# Supplementary material for: Assessment of Racial Disparities in Primary Care Physician Specialty Referrals
Source: PubMed Central journal article supplement (PMC7835717; doi:10.1001/jamanetworkopen.2020.29238), 2021-01-25

## Supplementary Online Content

Landon BE, Onnela JP, Meneades L, O'Malley AJ, Keating NL. Assessment of racial disparities in primary care physician specialty referrals. *JAMA Netw Open*. 2020;3(12):e2029238. doi:10.1001/jamanetworkopen.2020.29238

**eTable 1.** Network Measures by Market and Specialty Combined After Sampling White Patients

**eTable 2.** Distance Measures by Market and Specialty Combined After Sampling White Patients

**eFigure 1.** Distribution of States With Included Markets

**eFigure 2.** Physician Networks Visualized by Patients' Race

This supplementary material has been provided by the authors to give readers additional information about their work.

**eTable 1.** Network Measures by Market and Specialty Combined After Sampling White Patients

| Market            | SPEC    | PCP Degree All | Black * | White* | Specialist Degree All | Black* | White* | PCP Strength | Black* | White* |
|-------------------|---------|----------------|---------|--------|-----------------------|--------|--------|--------------|--------|--------|
| Chicago IL        | ALL     | 5.6            | 66%     | 73%    | 145.6                 | 59%    | 60%    | 1.6          | 86%    | 88%    |
| Memphis TN        | ALL     | 9.6            | 67%     | 74%    | 270.1                 | 52%    | 74%    | 2.9          | 78%    | 80%    |
| Baton Rouge LA    | ALL     | 8.0            | 67%     | 76%    | 200.0                 | 54%    | 78%    | 2.6          | 76%    | 78%    |
| Norfolk VA        | ALL     | 9.5            | 67%     | 73%    | 301.6                 | 51%    | 78%    | 2.6          | 77%    | 79%    |
| Lafayette LA      | ALL     | 5.7            | 68%     | 77%    | 184.5                 | 52%    | 84%    | 3.1          | 72%    | 78%    |
| Tallahassee FL    | ALL     | 4.8            | 75%     | 80%    | 133.6                 | 56%    | 83%    | 3.6          | 70%    | 72%    |
| Manhattan NY      | ALL     | 4.6            | 67%     | 75%    | 145.4                 | 28%    | 84%    | 1.5          | 90%    | 88%    |
| Jacksonville FL   | ALL     | 8.2            | 67%     | 73%    | 253.9                 | 41%    | 83%    | 2.3          | 78%    | 82%    |
| Miami FL          | ALL     | 6.7            | 66%     | 72%    | 204.1                 | 33%    | 82%    | 1.7          | 85%    | 88%    |
| San Bernardino CA | ALL     | 3.4            | 76%     | 74%    | 117.2                 | 36%    | 83%    | 1.8          | 82%    | 85%    |
| Buffalo NY        | ALL     | 4.6            | 67%     | 75%    | 138.7                 | 30%    | 84%    | 1.7          | 86%    | 85%    |
| Huntsville AL     | ALL     | 4.9            | 72%     | 76%    | 189.2                 | 40%    | 87%    | 1.8          | 81%    | 82%    |
| ALL               | CARDIO  | 12.4           | 64%     | 73%    | 261.0                 | 47%    | 81%    | 2.7          | 77%    | 79%    |
| ALL               | PULMN   | 5.6            | 73%     | 78%    | 262.2                 | 51%    | 81%    | 2.9          | 74%    | 79%    |
| ALL               | GASTRO  | 5.3            | 70%     | 76%    | 195.1                 | 45%    | 80%    | 2.3          | 80%    | 80%    |
| ALL               | ORTHO   | 4.8            | 63%     | 76%    | 102.7                 | 34%    | 83%    | 1.6          | 85%    | 89%    |
| ALL               | GENSURG | 4.5            | 73%     | 71%    | 115.6                 | 46%    | 76%    | 2.0          | 83%    | 82%    |
| ALL               | NEURO   | 5.1            | 70%     | 74%    | 205.4                 | 43%    | 80%    | 2.1          | 81%    | 82%    |

\* Black and White refer to the percentage of the overall measure present in the networks constructed using Black or White patients only. Degree is the number of ties between PCPs and specialists. Strength is the number of shared patients. All represents the average across physicians in each of the six specialties.

**eTable 2.** Distance Measures by Market and Specialty Combined After Sampling White Patients

| Market            | SPEC    | PCP to Specialist Distance | Black* | White* | Patient to Specialist Distance | Black* | White* |
|-------------------|---------|----------------------------|--------|--------|--------------------------------|--------|--------|
| Chicago IL        | ALL     | 2.4                        | 107%   | 94%    | 10.6                           | 97%    | 103%   |
| Memphis TN        | ALL     | 8.8                        | 98%    | 101%   | 17.4                           | 95%    | 104%   |
| Baton Rouge LA    | ALL     | 6.7                        | 100%   | 100%   | 13.7                           | 98%    | 102%   |
| Norfolk VA        | ALL     | 9.2                        | 99%    | 101%   | 15.0                           | 95%    | 105%   |
| Lafayette LA      | ALL     | 7.8                        | 96%    | 103%   | 12.7                           | 90%    | 107%   |
| Tallahassee FL    | ALL     | 6.1                        | 95%    | 105%   | 18.8                           | 98%    | 101%   |
| Manhattan NY      | ALL     | 2.4                        | 97%    | 102%   | 8.1                            | 102%   | 98%    |
| Jacksonville FL   | ALL     | 9.7                        | 98%    | 102%   | 17.8                           | 96%    | 103%   |
| Miami FL          | ALL     | 7.1                        | 102%   | 98%    | 17.4                           | 100%   | 99%    |
| San Bernardino CA | ALL     | 7.7                        | 101%   | 99%    | 21.9                           | 97%    | 102%   |
| Buffalo NY        | ALL     | 6.0                        | 95%    | 105%   | 12.9                           | 59%    | 135%   |
| Huntsville AL     | ALL     | 5.7                        | 96%    | 103%   | 14.7                           | 88%    | 110%   |
| ALL               | CARDIO  | 7.3                        | 99%    | 101%   | 15.6                           | 92%    | 106%   |
| ALL               | PULMN   | 5.8                        | 100%   | 100%   | 15.4                           | 91%    | 107%   |
| ALL               | GASTRO  | 6.3                        | 98%    | 102%   | 15.2                           | 92%    | 107%   |
| ALL               | ORTHO   | 7.5                        | 97%    | 102%   | 14.4                           | 95%    | 104%   |
| ALL               | GENSURG | 6.2                        | 99%    | 100%   | 15.0                           | 99%    | 100%   |
| ALL               | NEURO   | 6.8                        | 99%    | 101%   | 15.0                           | 89%    | 109%   |

\* Black and White refer to the percentage of the overall measure present in the networks constructed using Black or White patients only. All represents the average across physicians in each of the six specialties.



**eFigure 2.** Physician Networks Visualized by Patients' Race

**Hospital Referral Regions (1-12) are Buffalo, Chicago, Huntsville, Jacksonville, Lafayette, Lynchburg, Manhattan, Memphis, Miami, Norfolk, San Bernardino, and Tallahassee. Specialties (1-6) are cardiology, gastroenterology, general surgery, neurology, orthopedic surgery, and pulmonary disease.**

# HRR: 1; Specialty: 1; Sample: 1

6

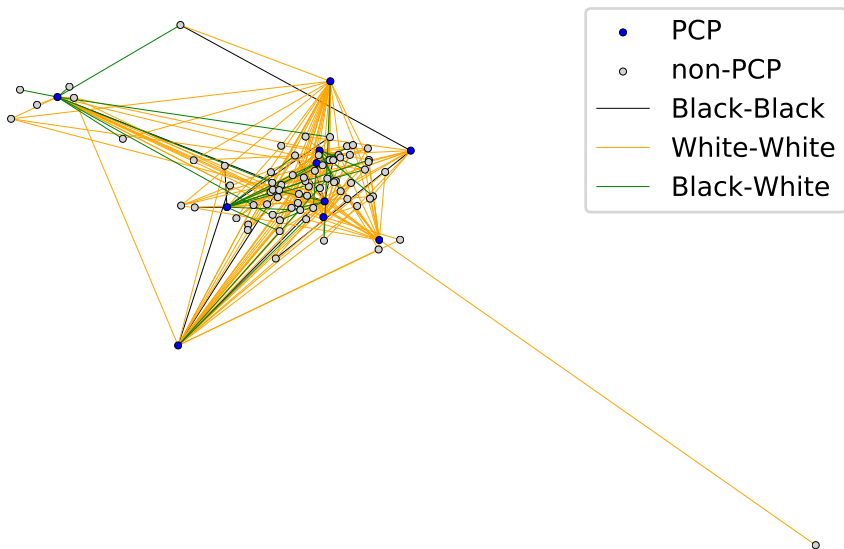

7

HRR: 1; Specialty: 1; Sample: 2

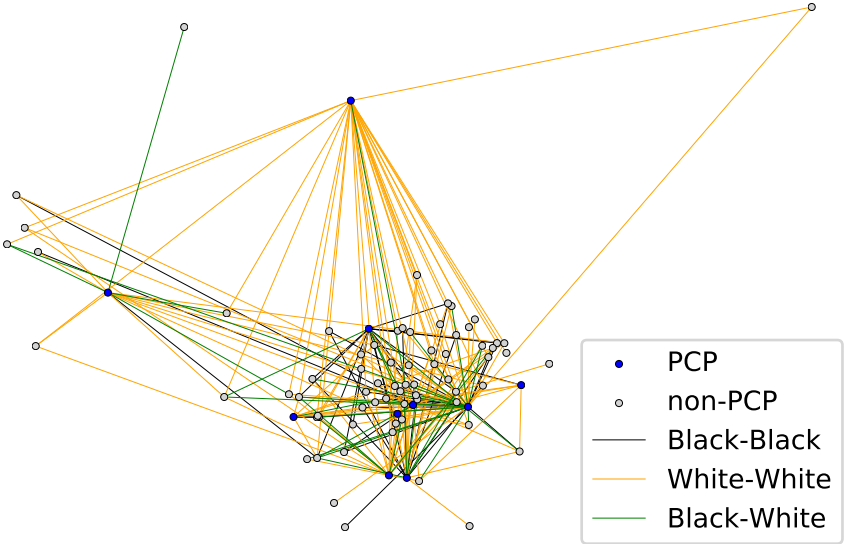

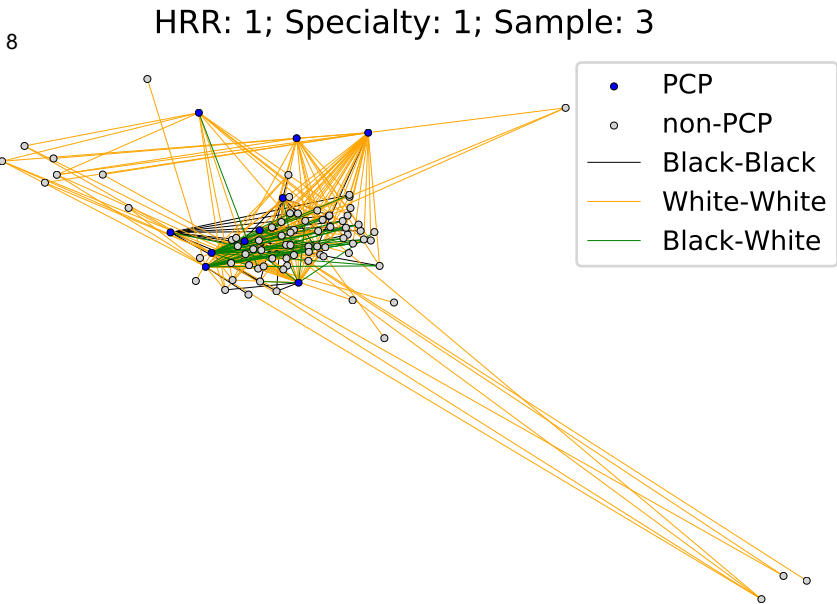



# HRR: 1; Specialty: 2; Sample: 1

9

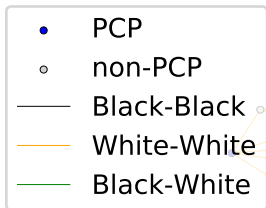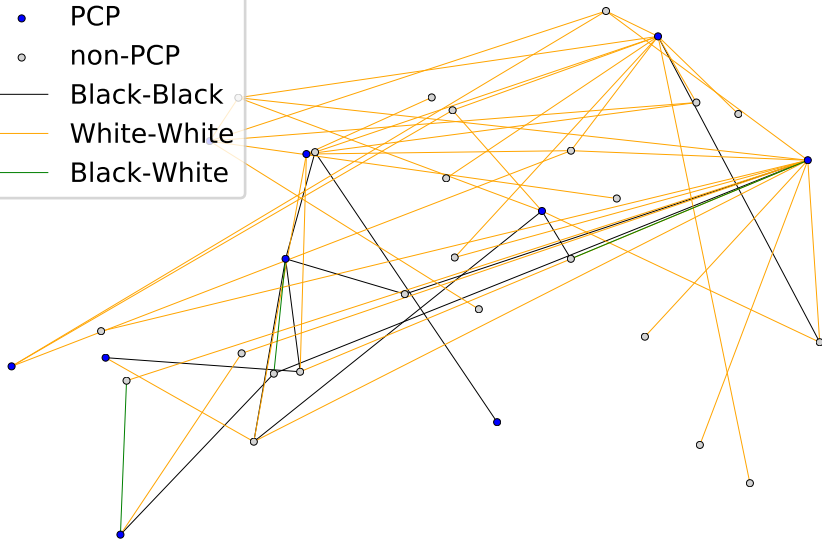

10

HRR: 1; Specialty: 2; Sample: 2

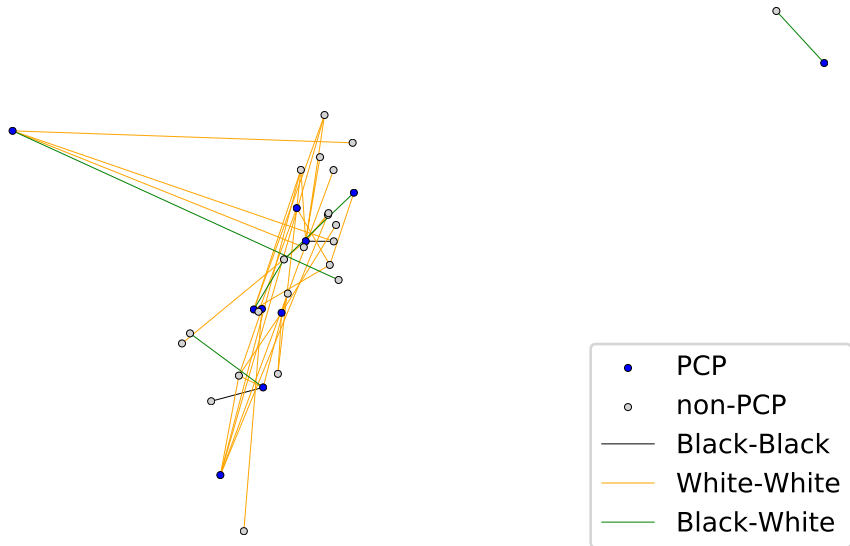

HRR: 1; Specialty: 2; Sample: 3

11

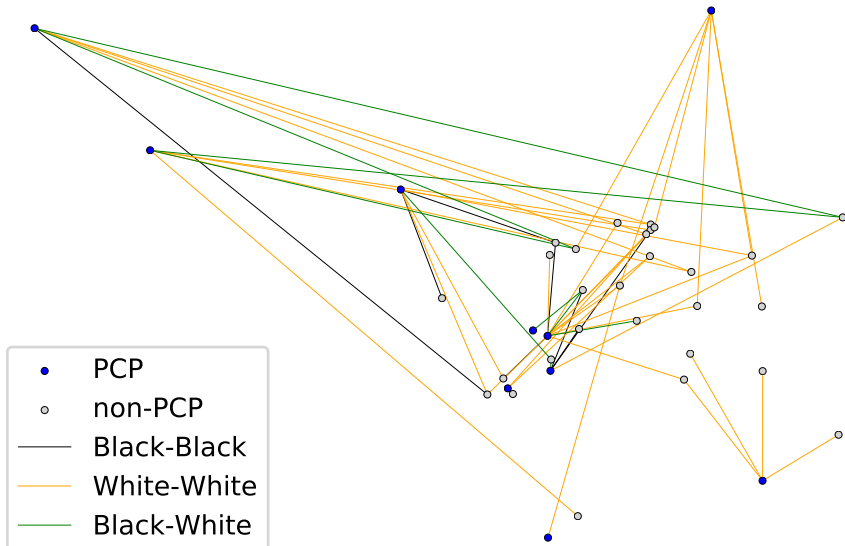

© 2021 Landon BE et al. JAMA Network Open.

HRR: 1; Specialty: 3; Sample: 1

12

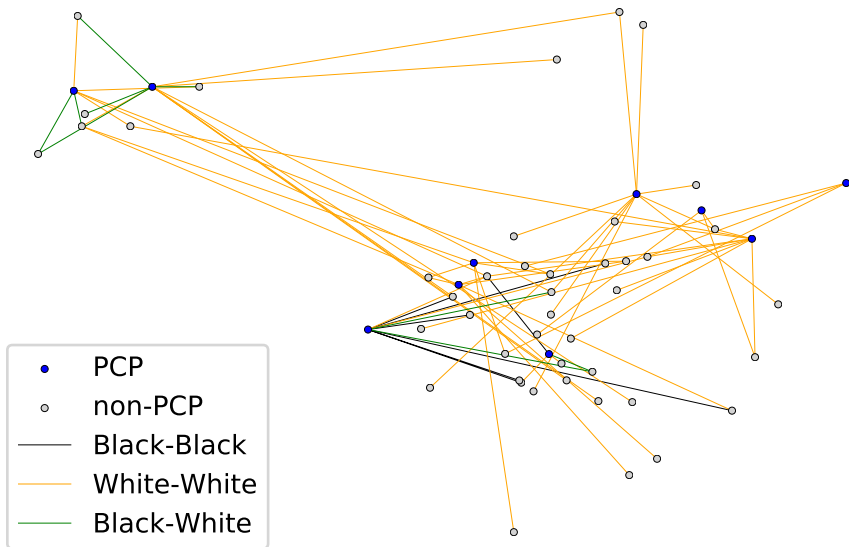

© 2021 Landon BE et al. JAMA Network Open.

## HRR: 1; Specialty: 3; Sample: 2

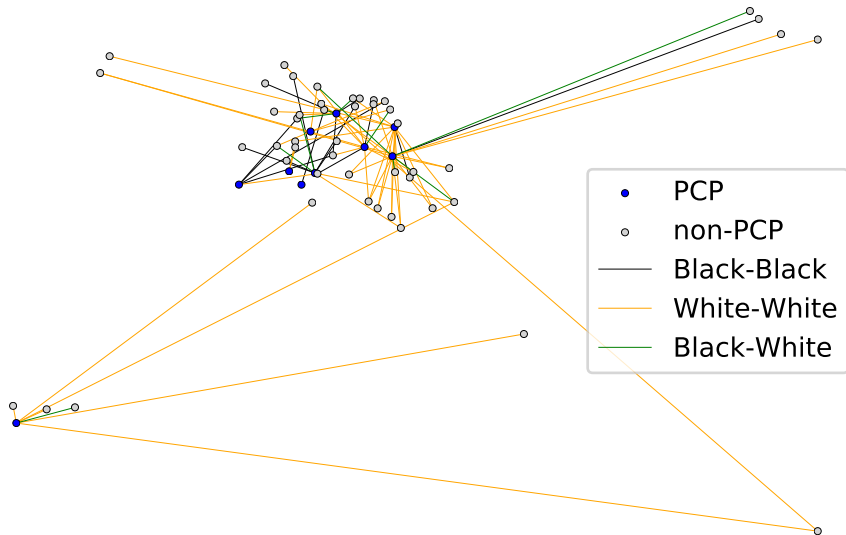

14

HRR: 1; Specialty: 3; Sample: 3

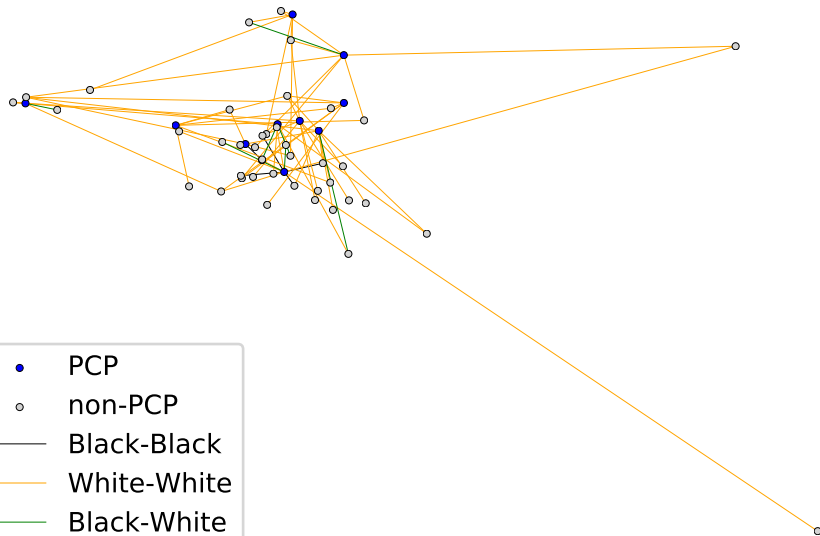

15

HRR: 1; Specialty: 4; Sample: 1

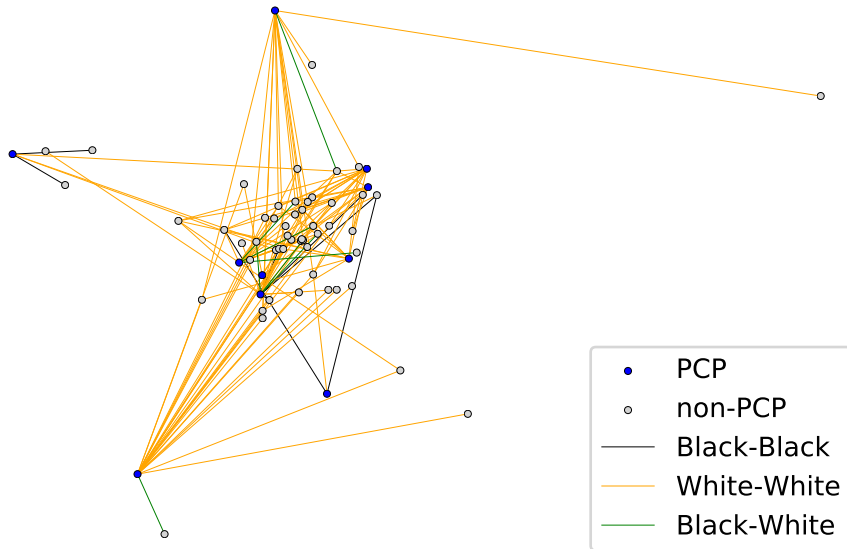

# HRR: 1; Specialty: 4; Sample: 2

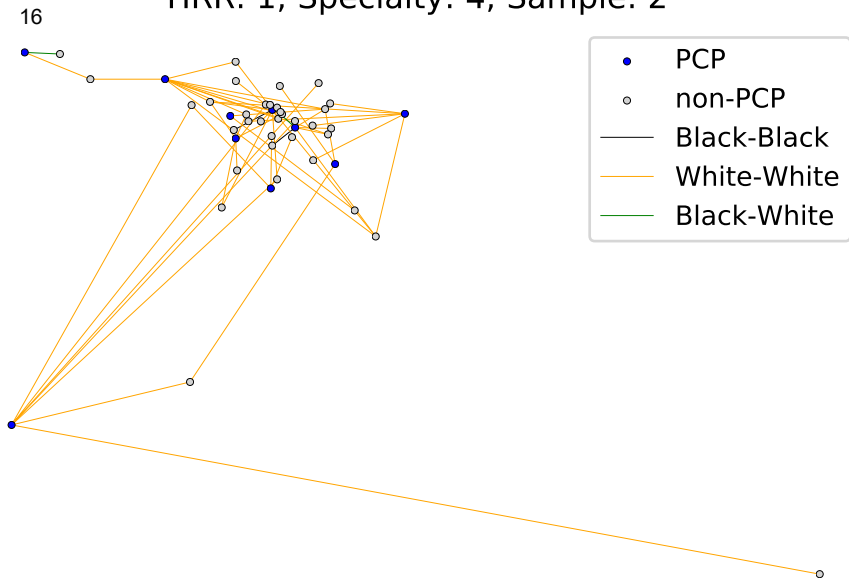



17

HRR: 1; Specialty: 4; Sample: 3

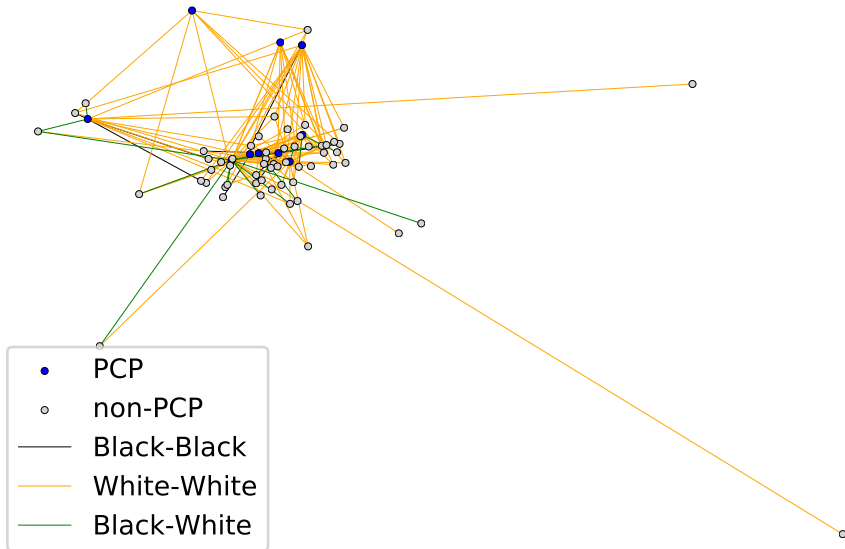

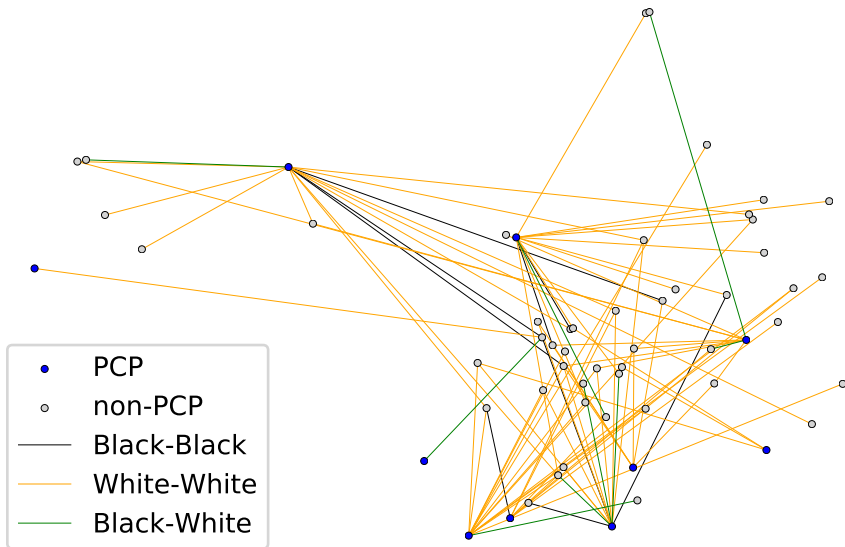

## HRR: 1; Specialty: 5; Sample: 2

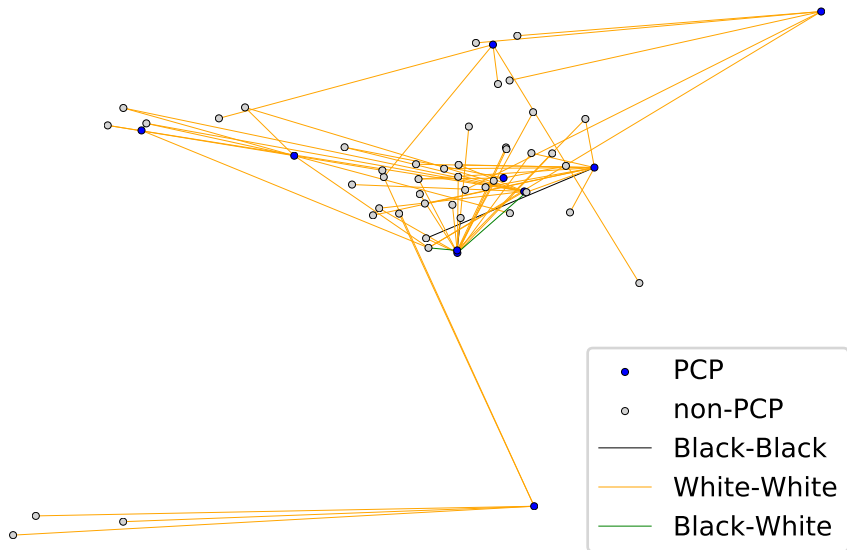

HRR: 1; Specialty: 5; Sample: 3

20

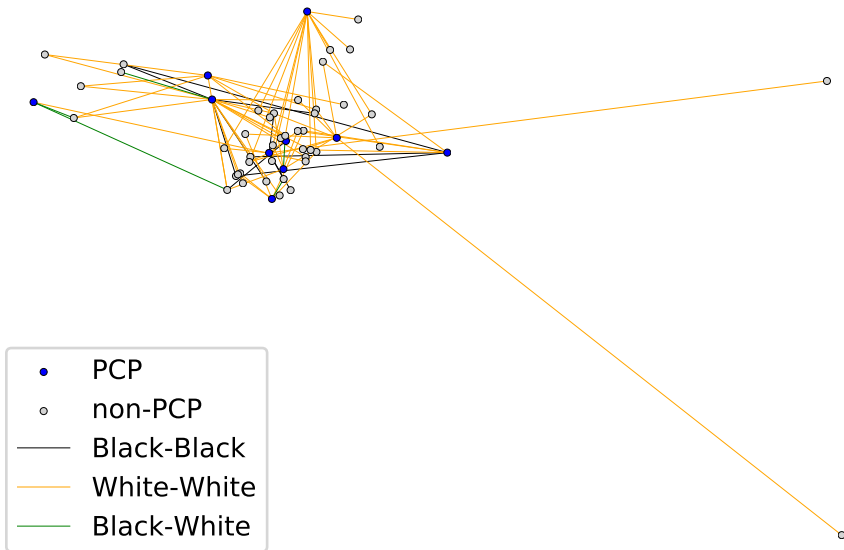

21

HRR: 1; Specialty: 6; Sample: 1

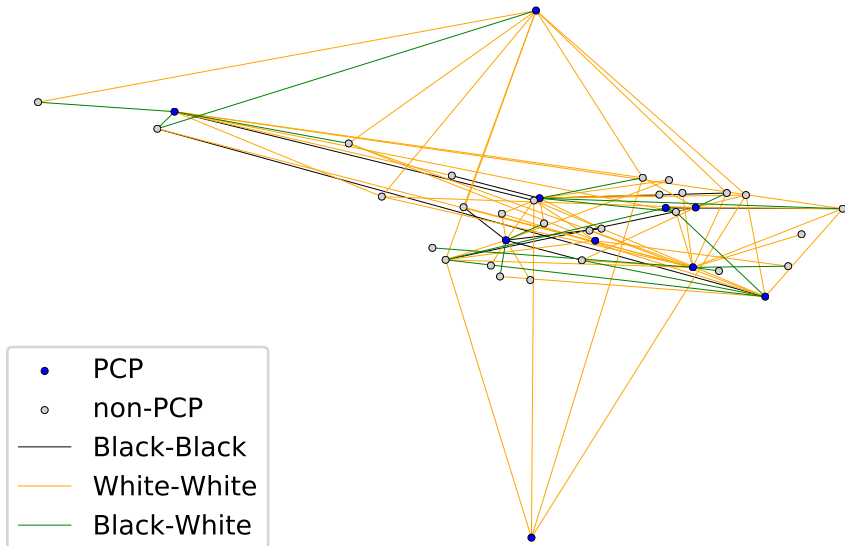

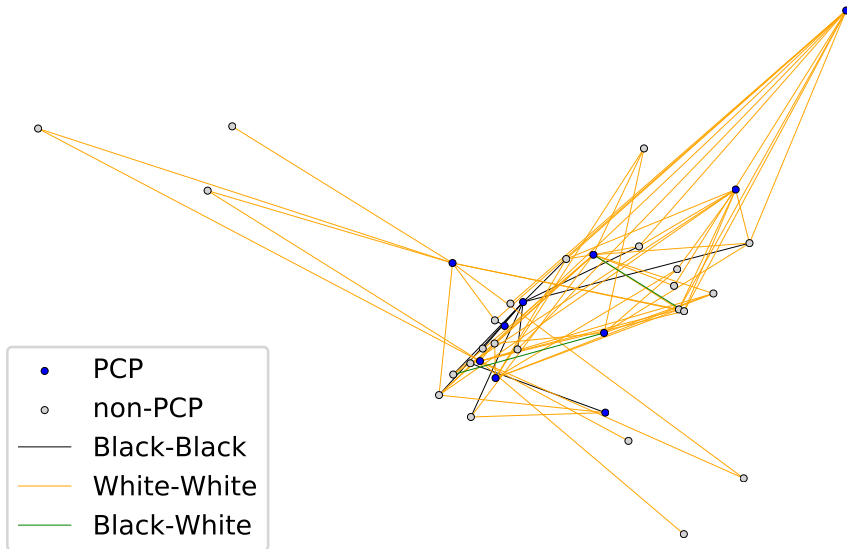

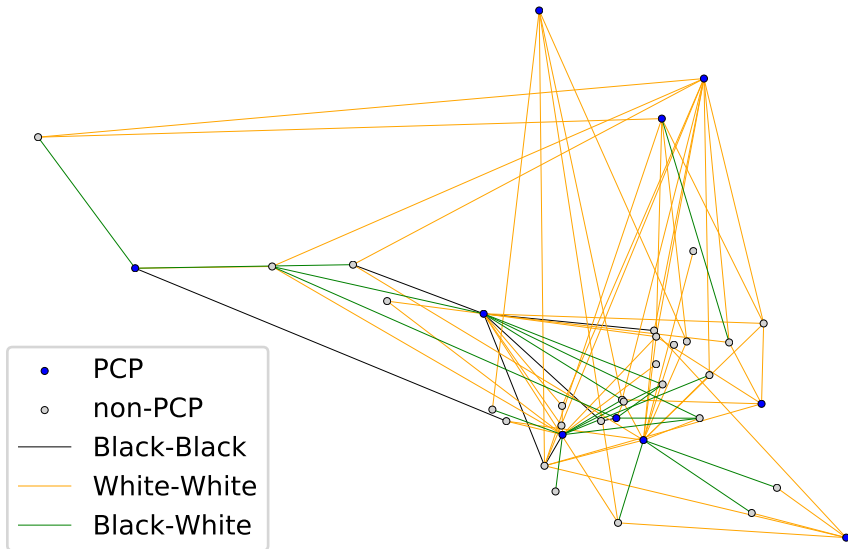

24

HRR: 2; Specialty: 1; Sample: 1

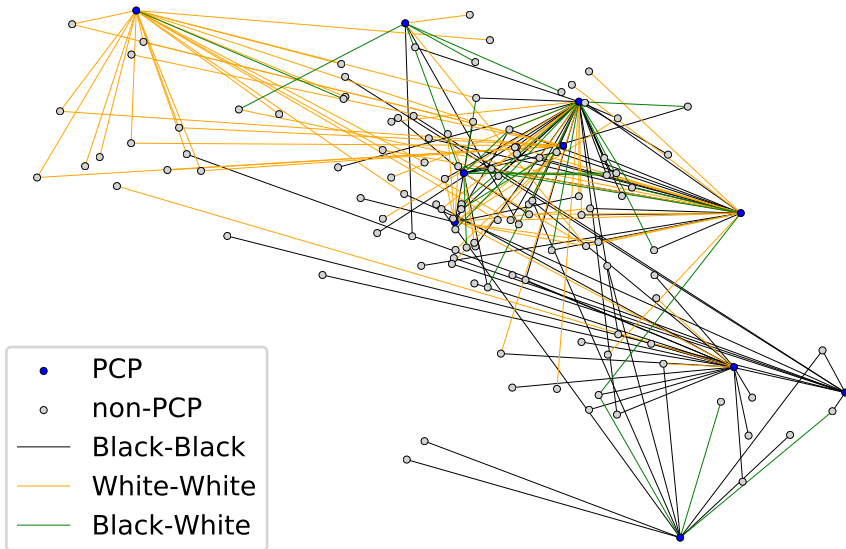



# HRR: 2; Specialty: 1; Sample: 2

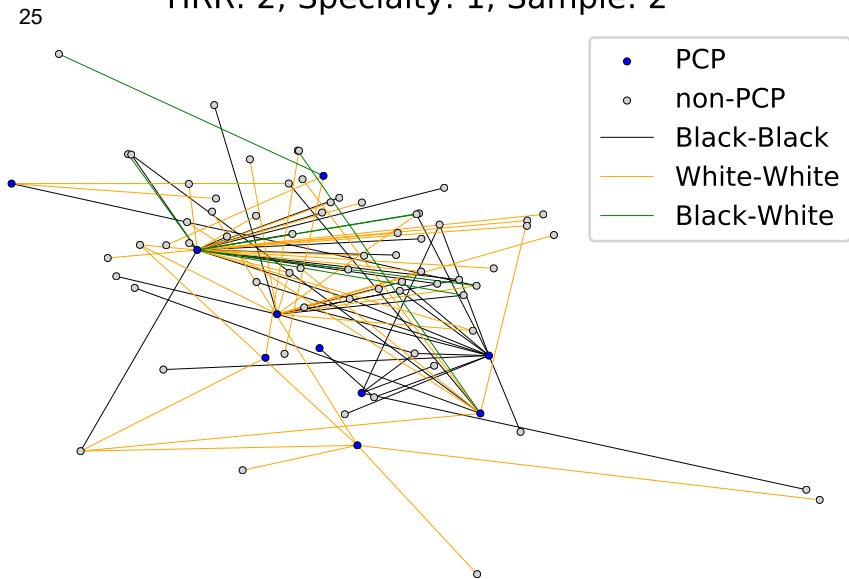

# HRR: 2; Specialty: 1; Sample: 3

26

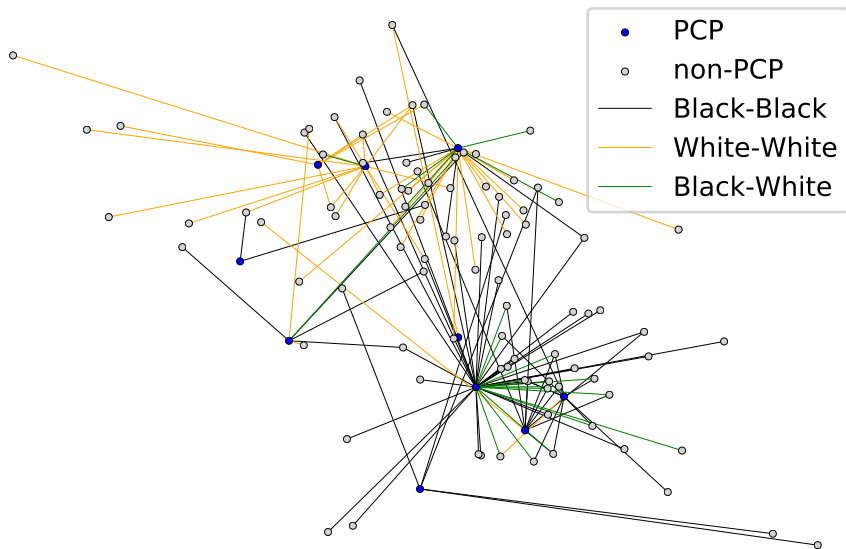

## HRR: 2; Specialty: 2; Sample: 1

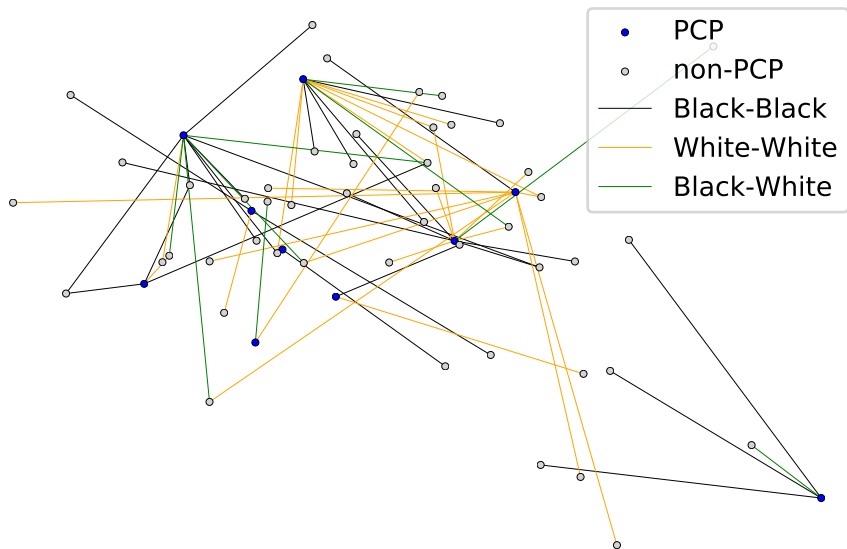

## HRR: 2; Specialty: 2; Sample: 2

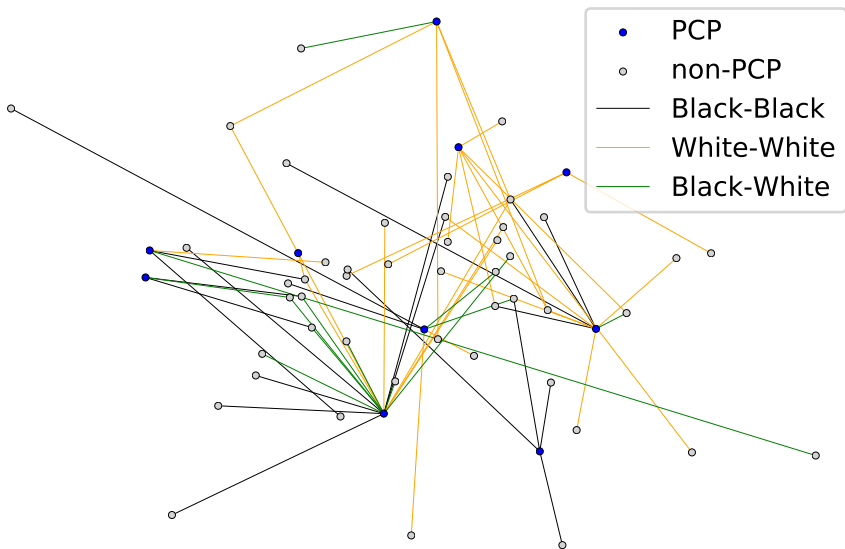

## HRR: 2; Specialty: 2; Sample: 3

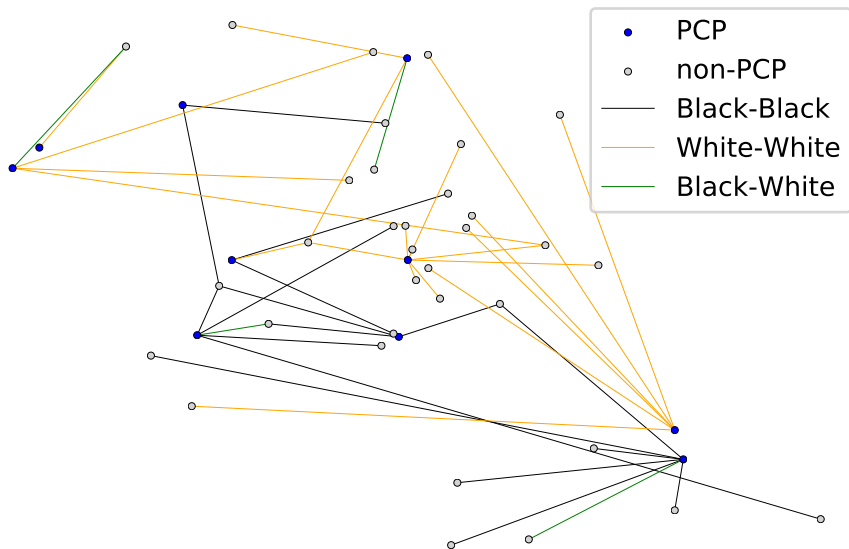

# HRR: 2; Specialty: 3; Sample: 1

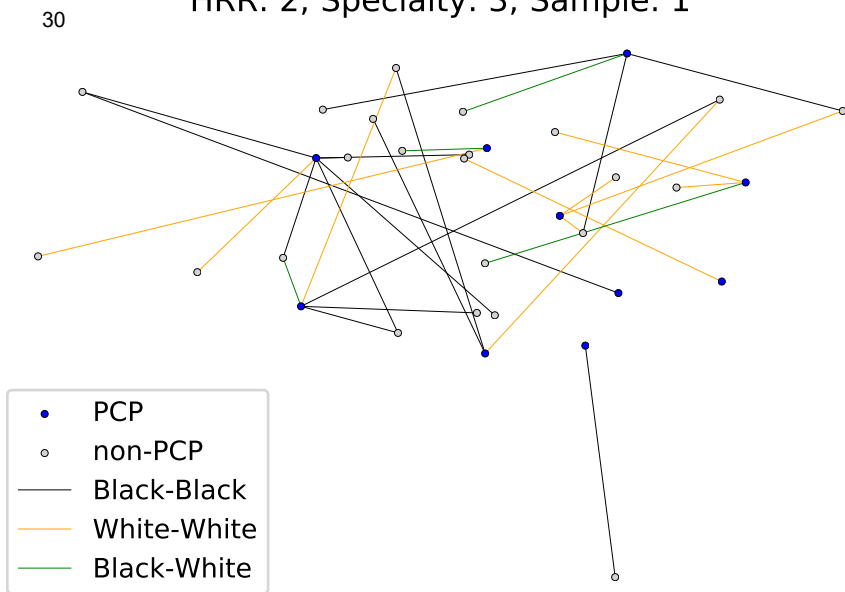

## HRR: 2; Specialty: 3; Sample: 2

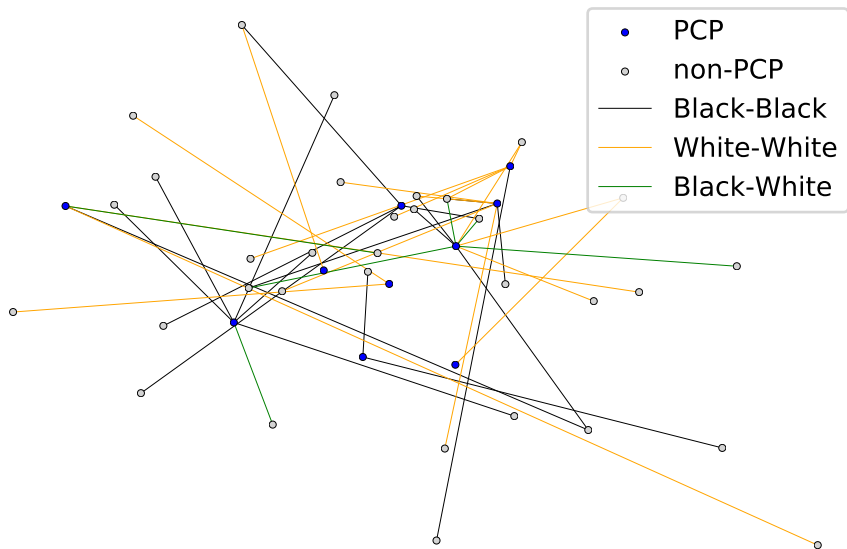

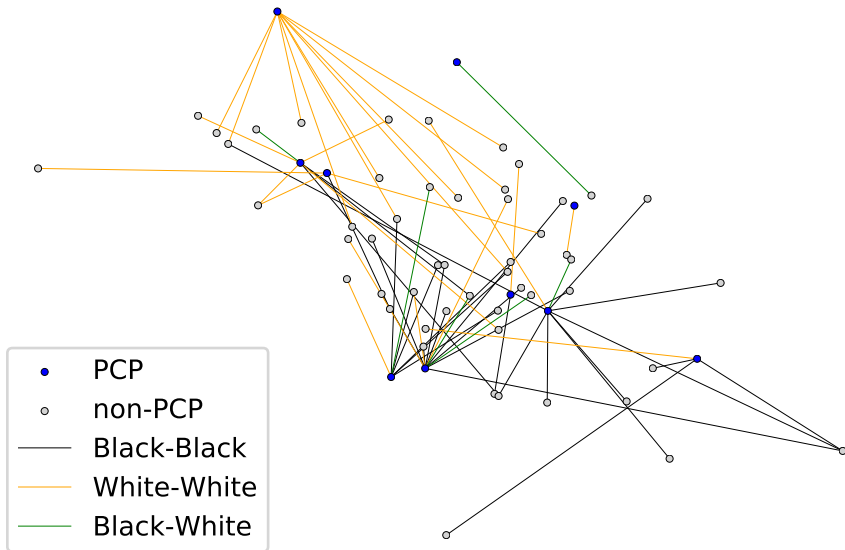



# HRR: 2; Specialty: 4; Sample: 1

33

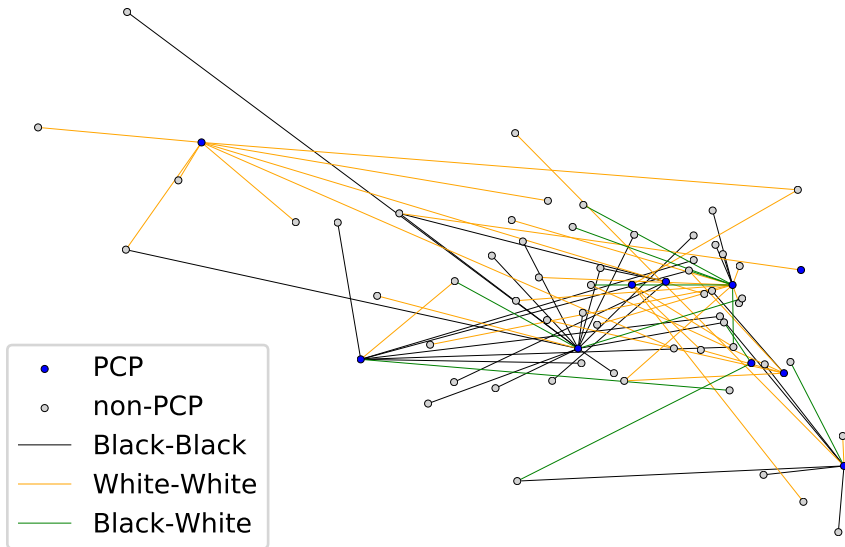

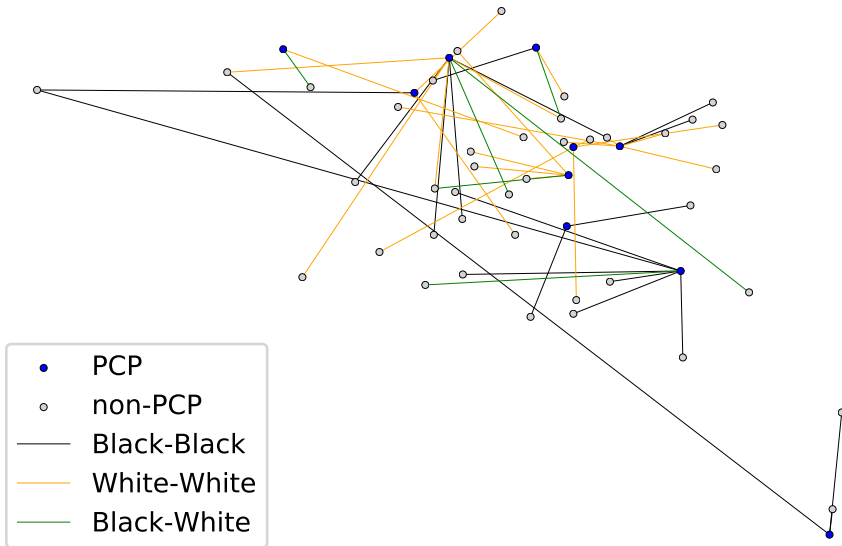

35

HRR: 2; Specialty: 4; Sample: 3

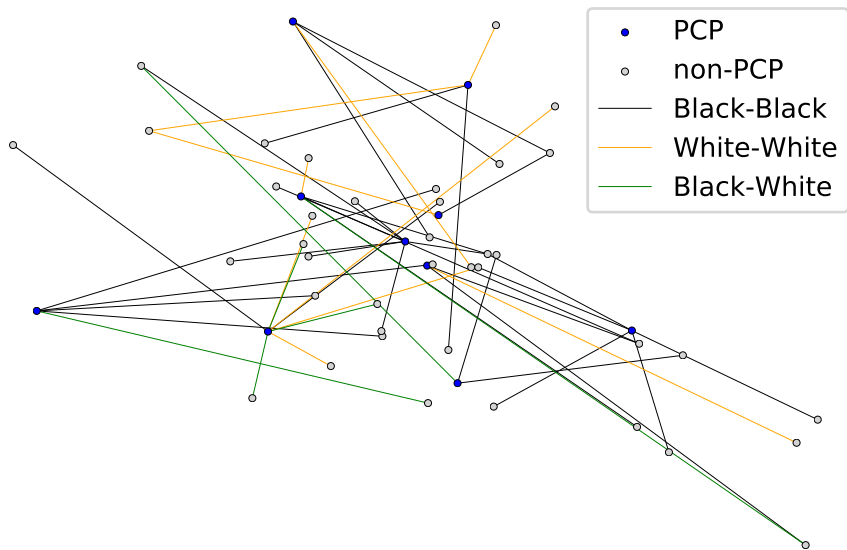

# HRR: 2; Specialty: 5; Sample: 1

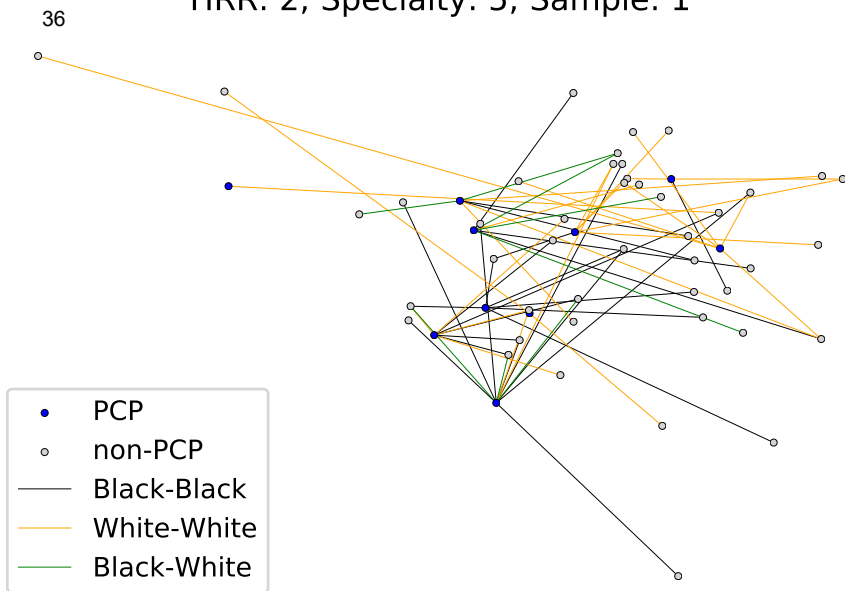

# HRR: 2; Specialty: 5; Sample: 2

37

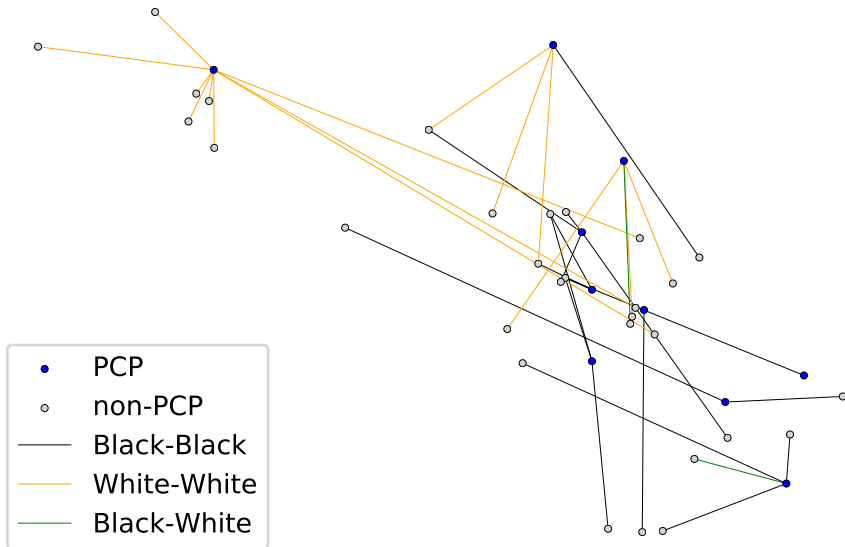

# HRR: 2; Specialty: 5; Sample: 3

38

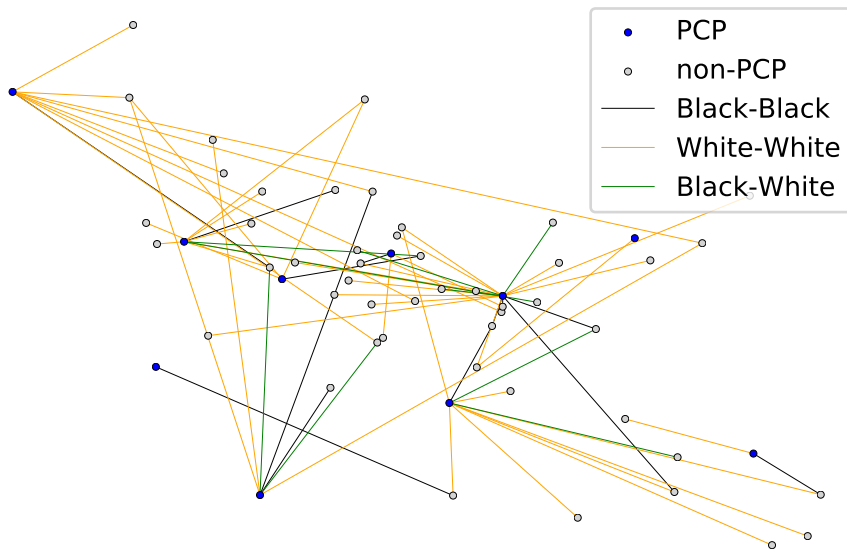

# HRR: 2; Specialty: 6; Sample: 1

39

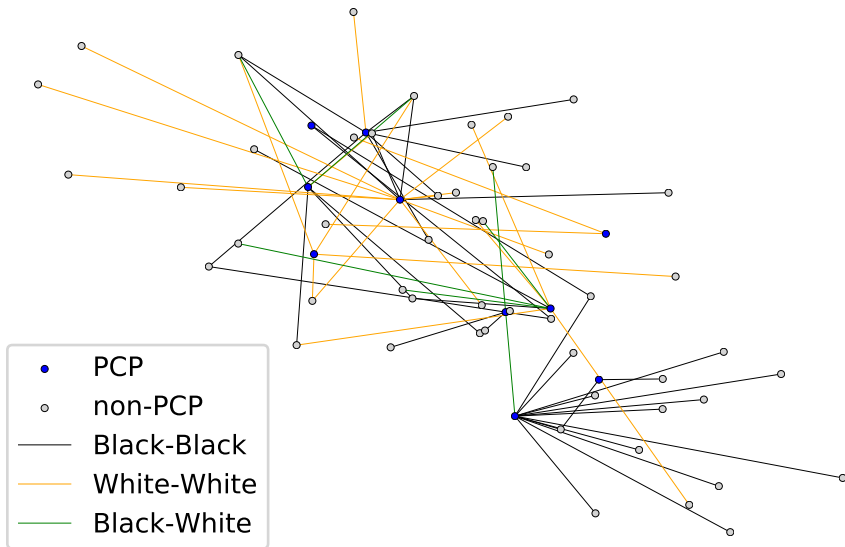

HRR: 2; Specialty: 6; Sample: 2

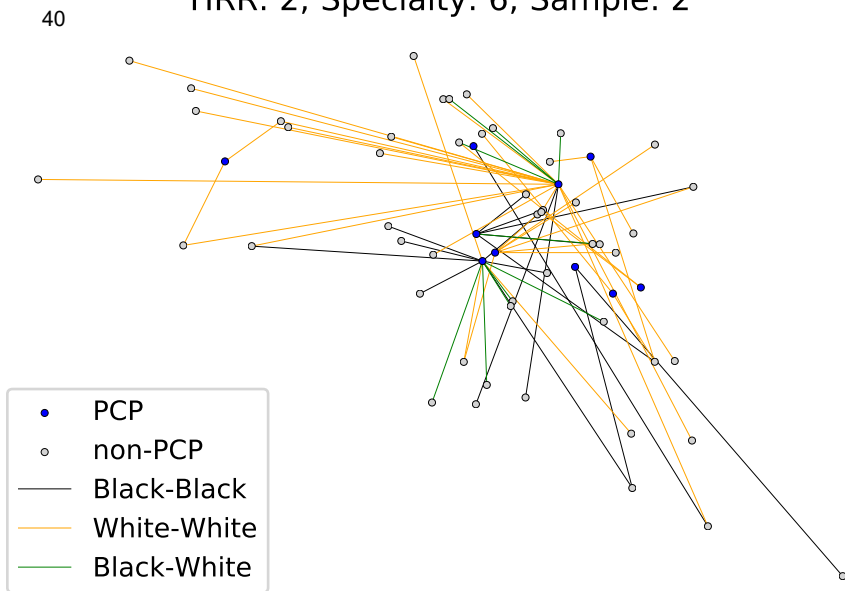



41

HRR: 2; Specialty: 6; Sample: 3

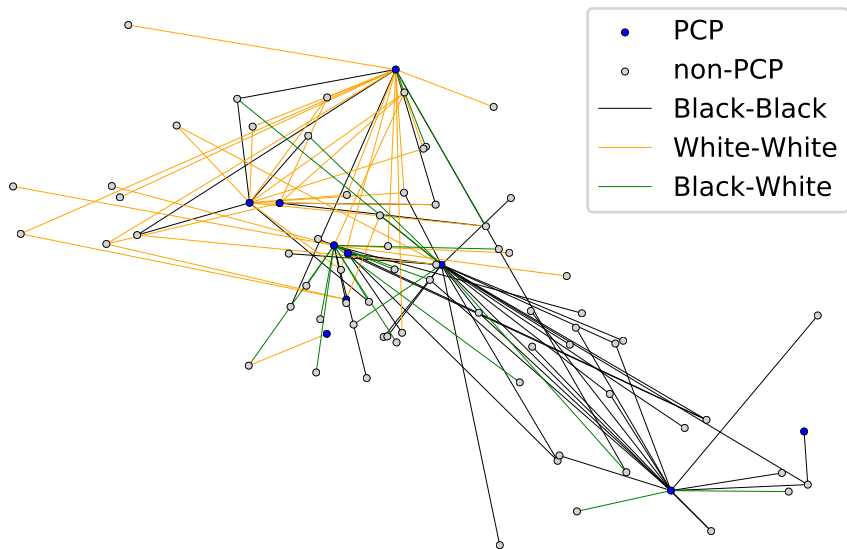

HRR: 3; Specialty: 1; Sample: 1

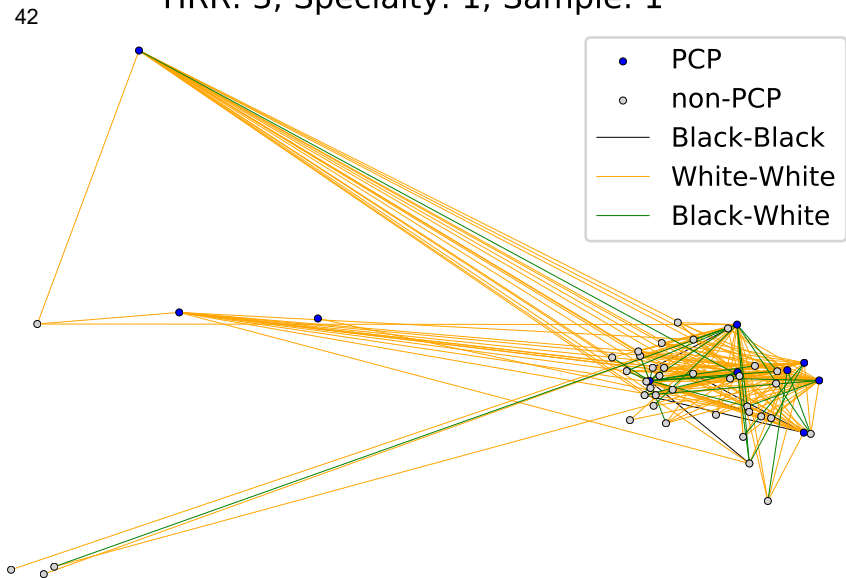

43

HRR: 3; Specialty: 1; Sample: 2

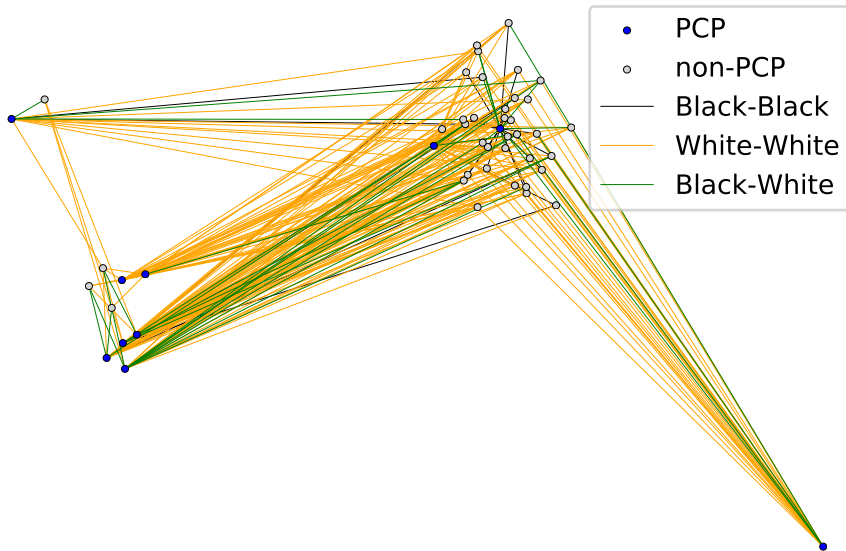

44

HRR: 3; Specialty: 1; Sample: 3

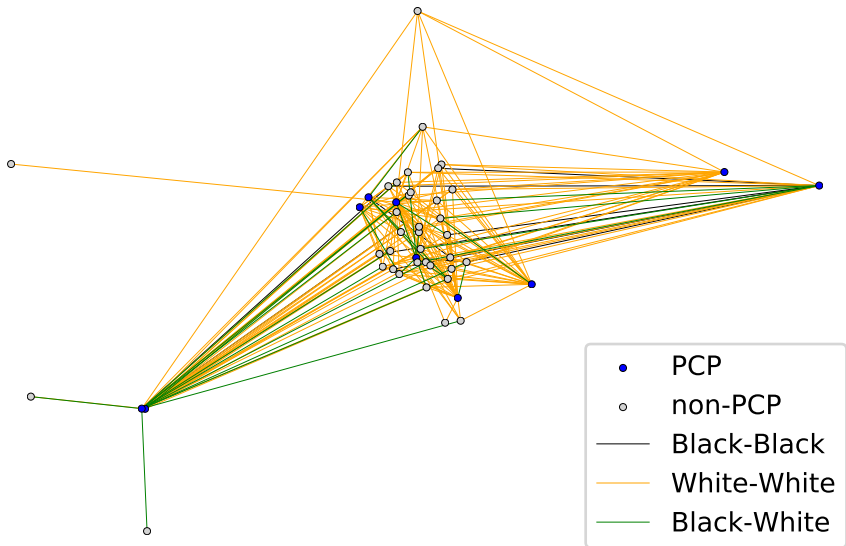

HRR: 3; Specialty: 2; Sample: 1

45

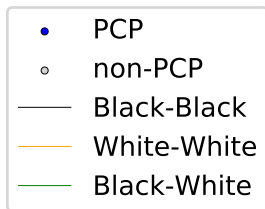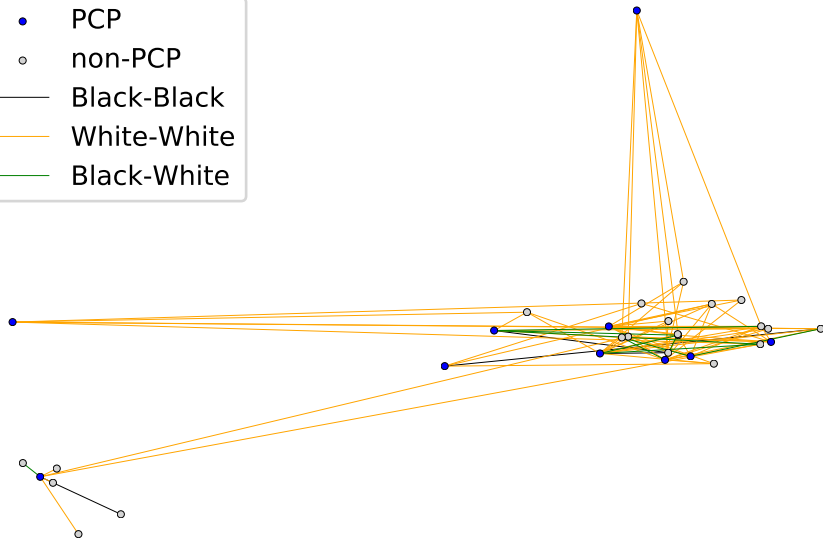

46

HRR: 3; Specialty: 2; Sample: 2

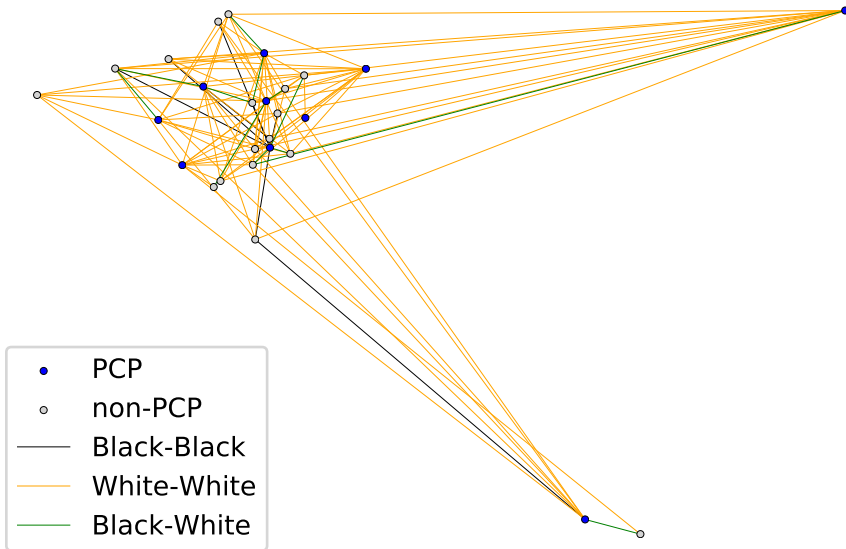

HRR: 3; Specialty: 2; Sample: 3

47

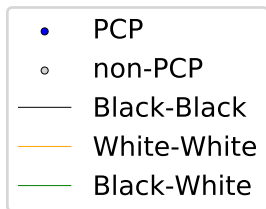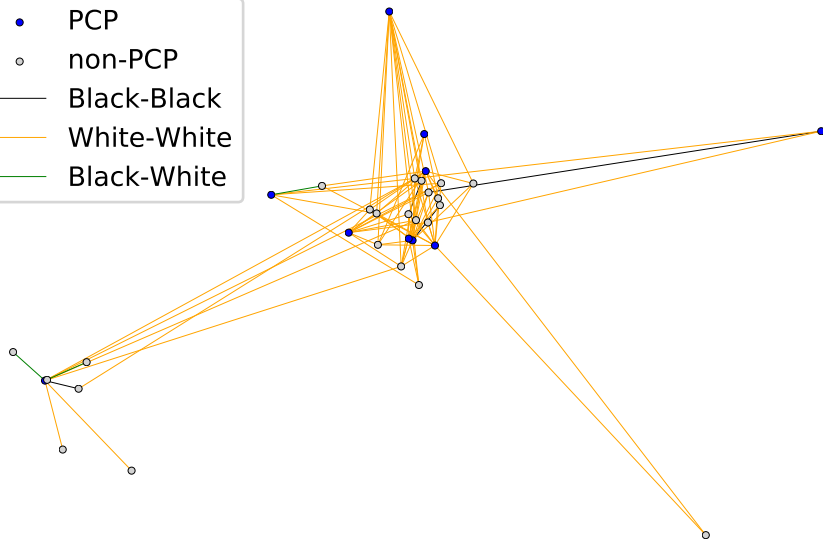

# HRR: 3; Specialty: 3; Sample: 1

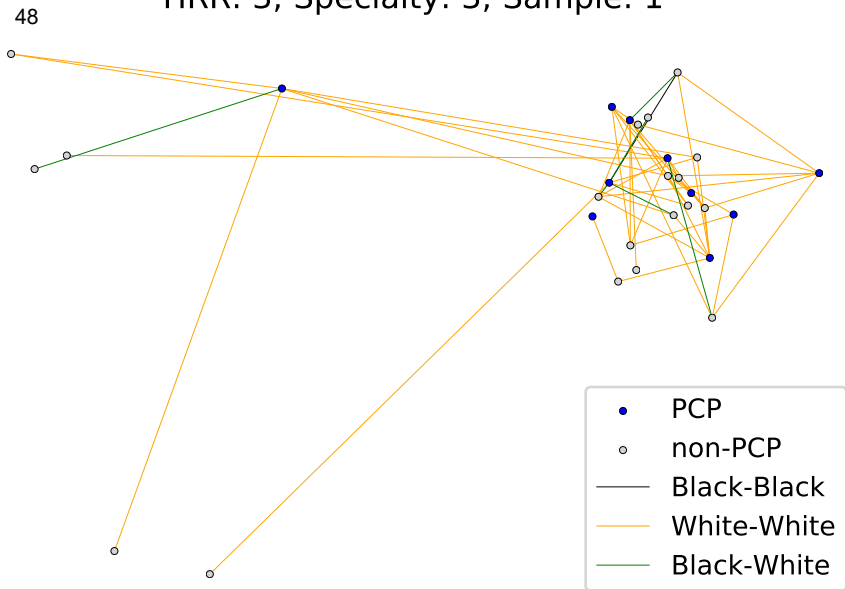



## HRR: 3; Specialty: 3; Sample: 2

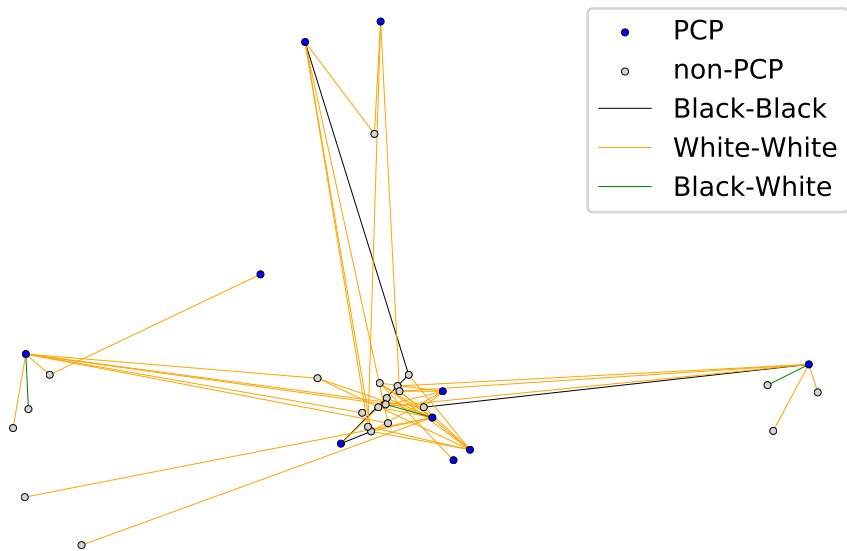

# HRR: 3; Specialty: 3; Sample: 3

50

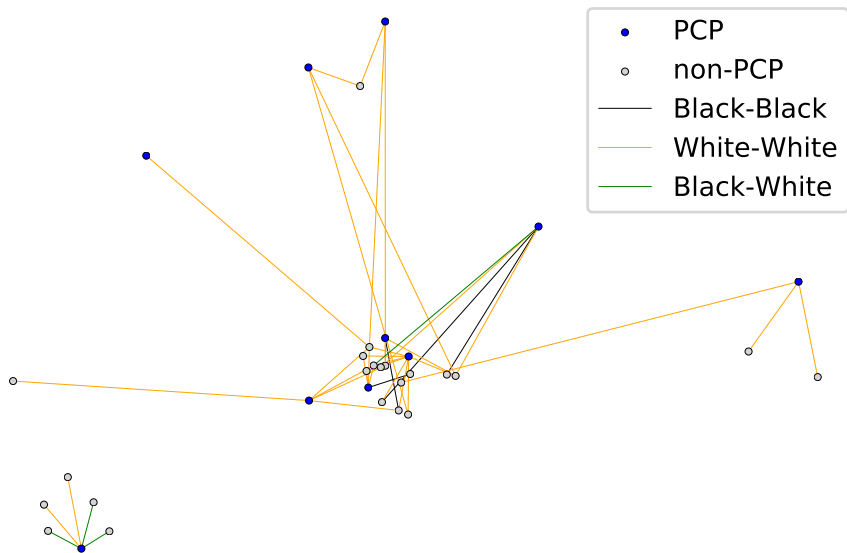

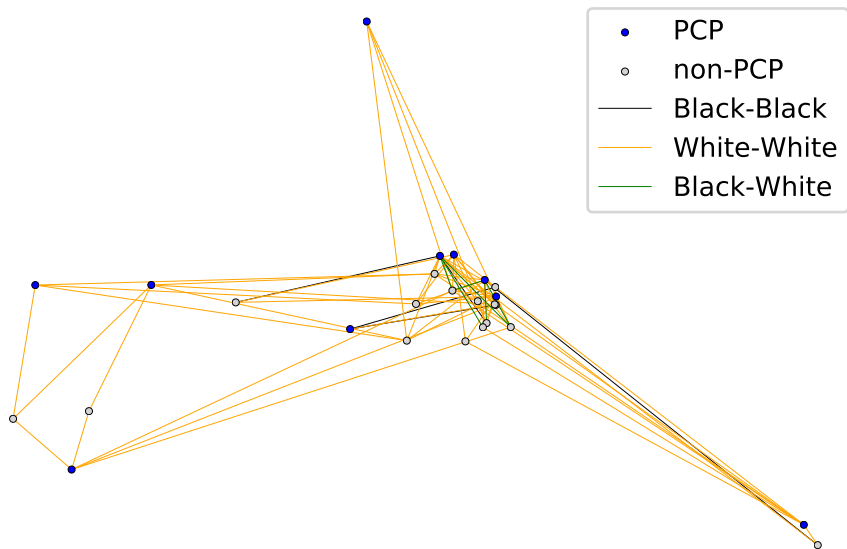

# HRR: 3; Specialty: 4; Sample: 2

52

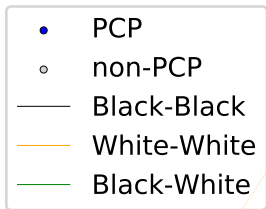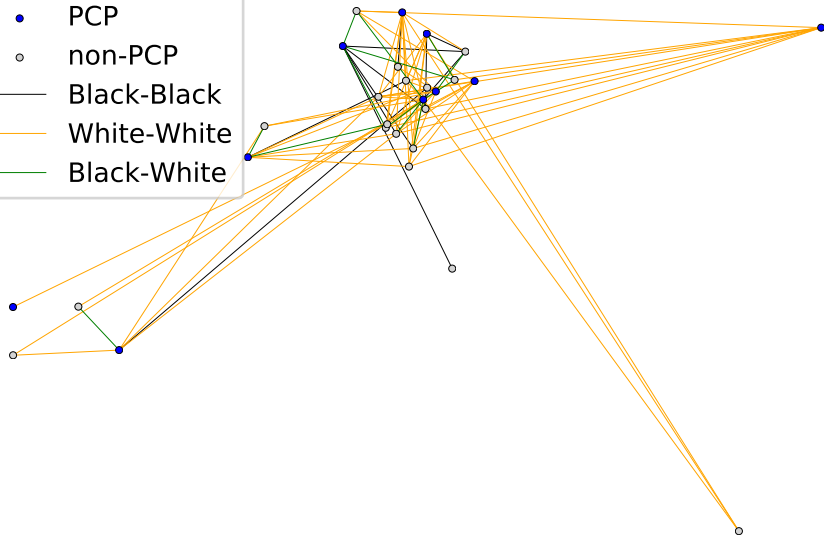

HRR: 3; Specialty: 4; Sample: 3

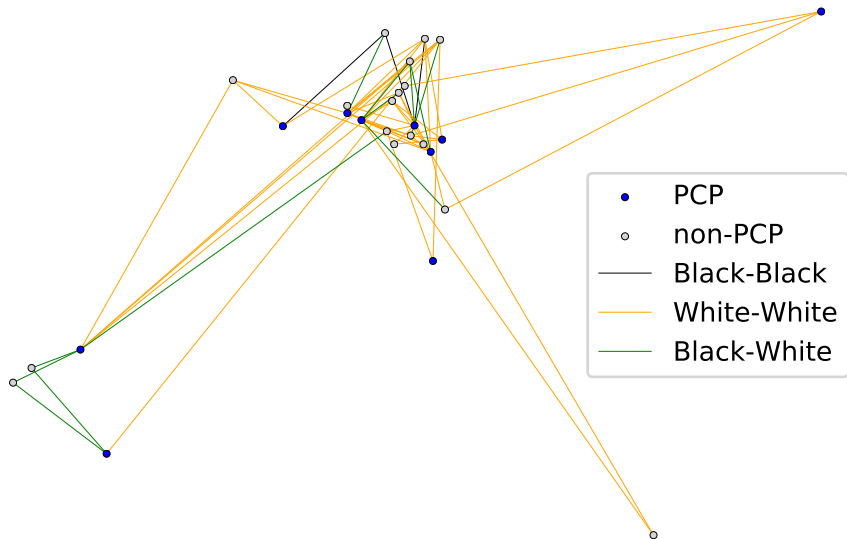

HRR: 3; Specialty: 5; Sample: 1

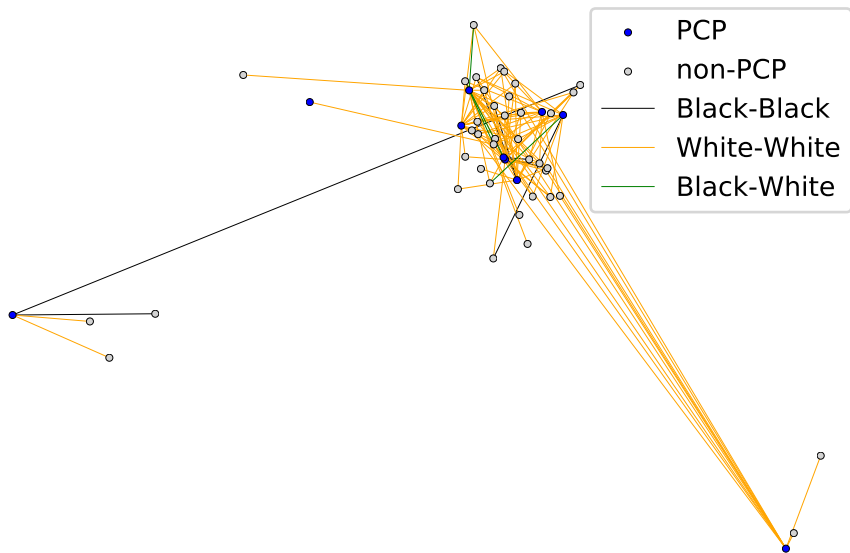

HRR: 3; Specialty: 5; Sample: 2

55

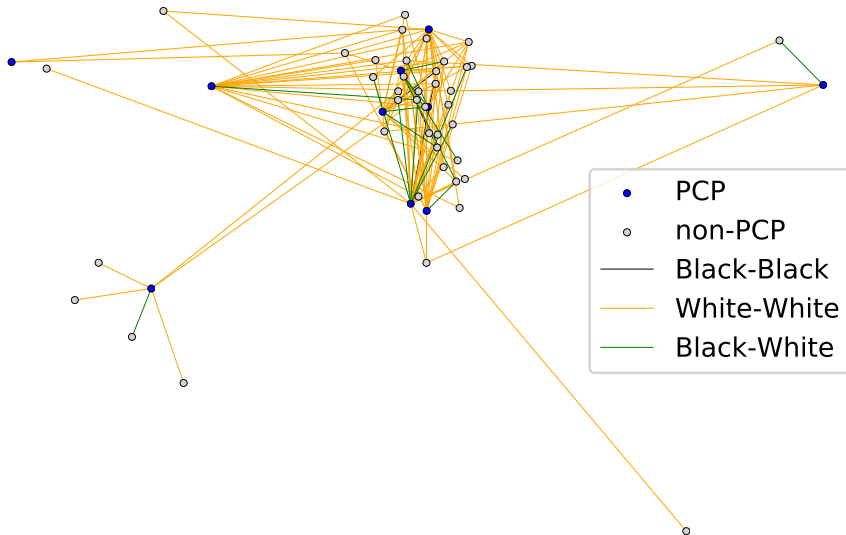

56

HRR: 3; Specialty: 5; Sample: 3

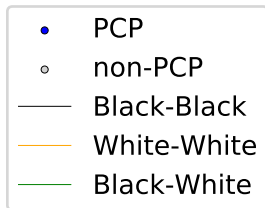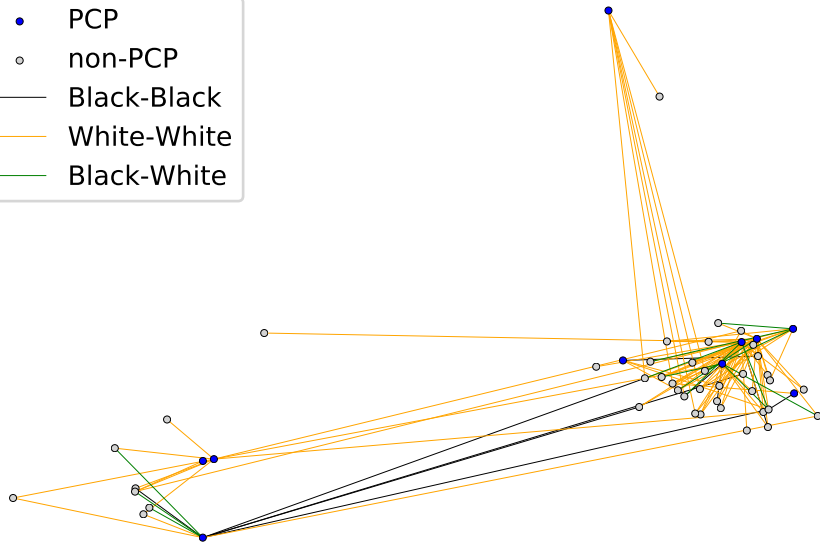



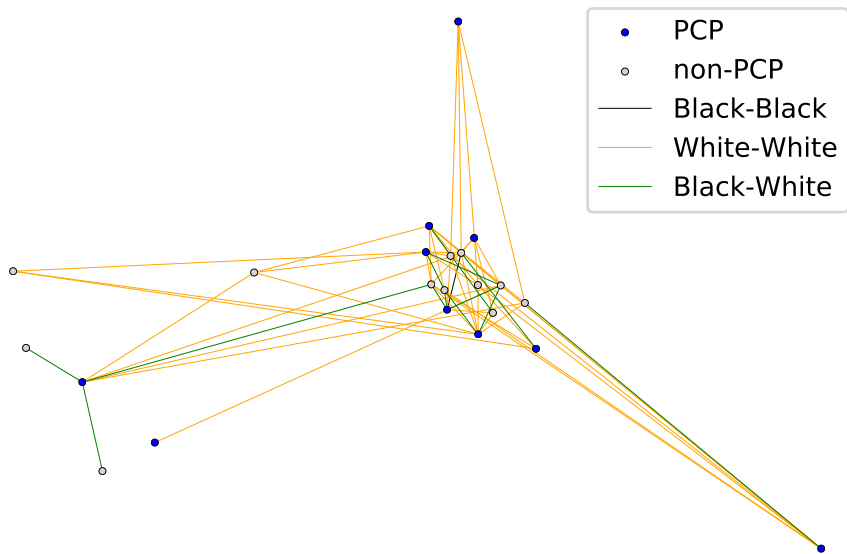

HRR: 3; Specialty: 6; Sample: 2

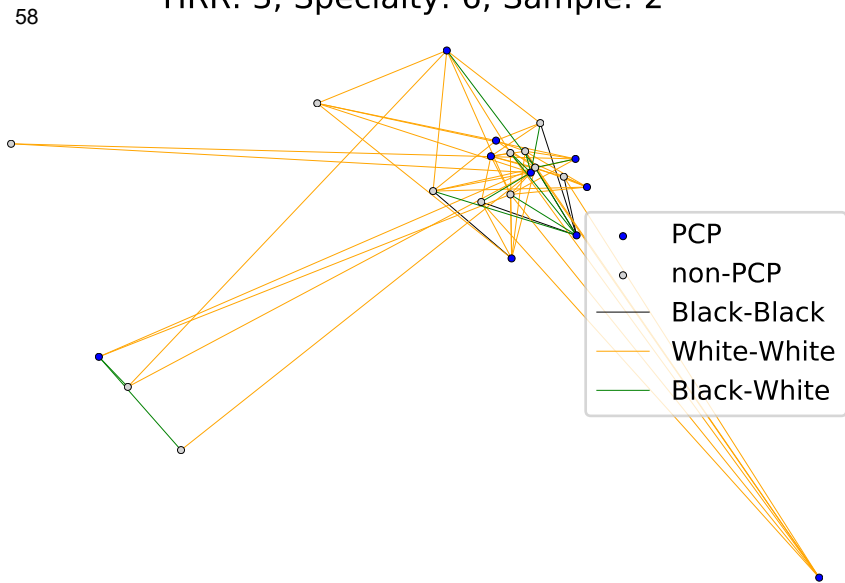

HRR: 3; Specialty: 6; Sample: 3

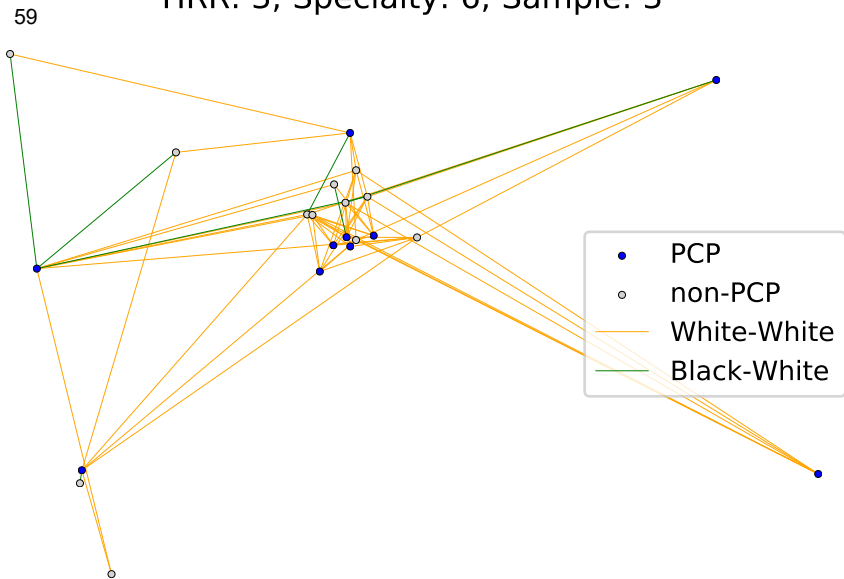

60

HRR: 4; Specialty: 1; Sample: 1

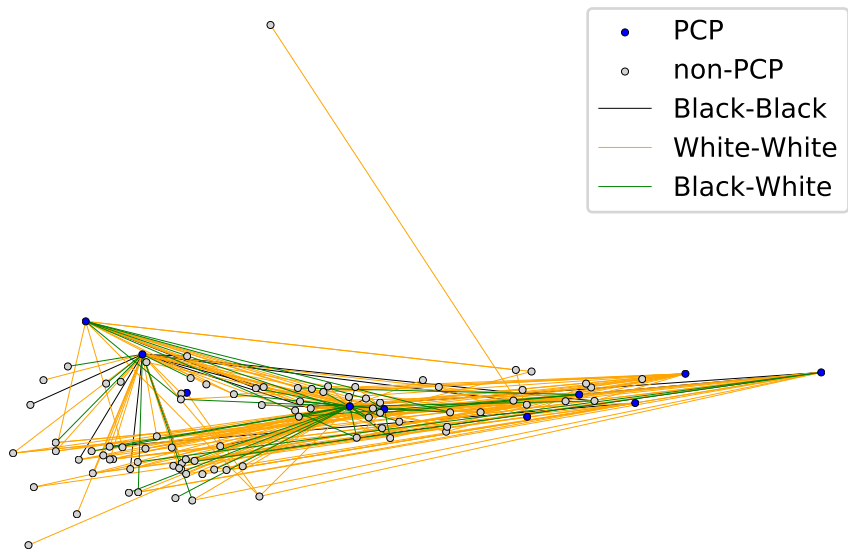

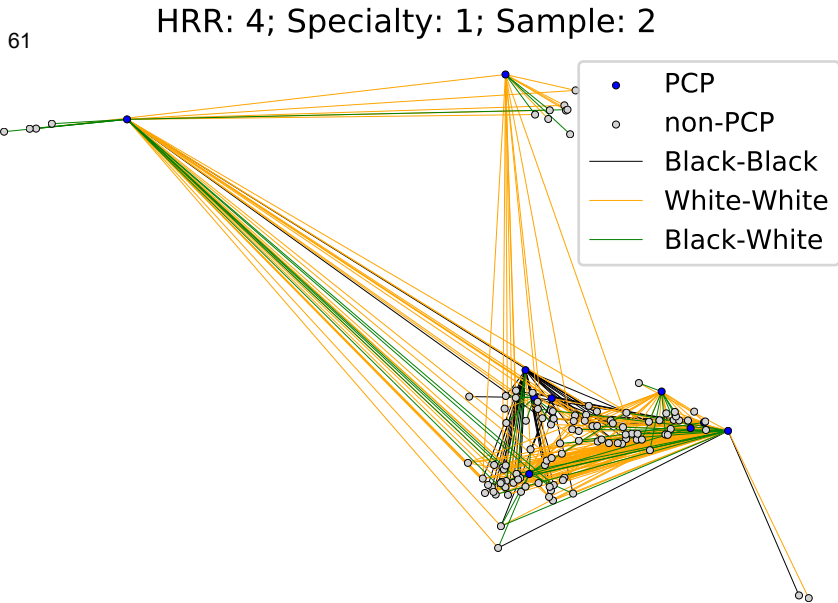

HRR: 4; Specialty: 1; Sample: 3

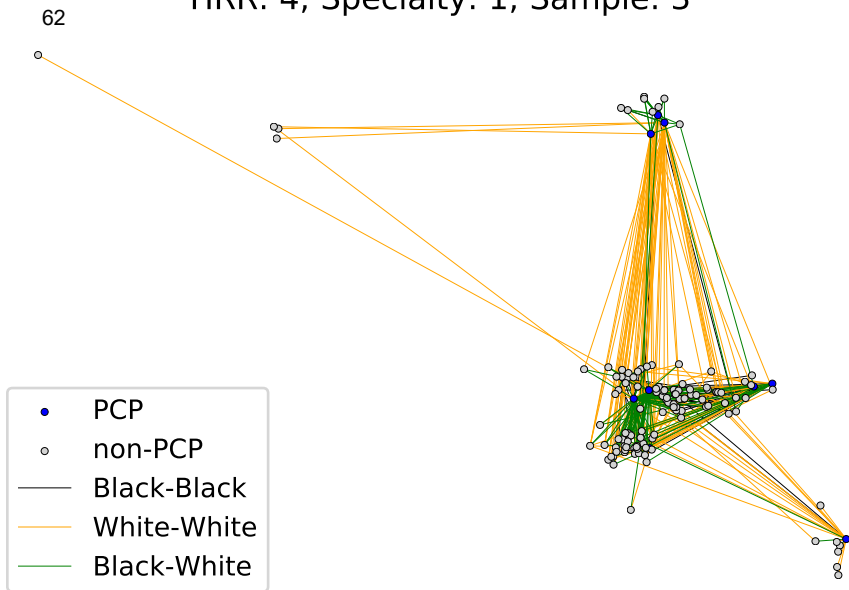

HRR: 4; Specialty: 2; Sample: 1

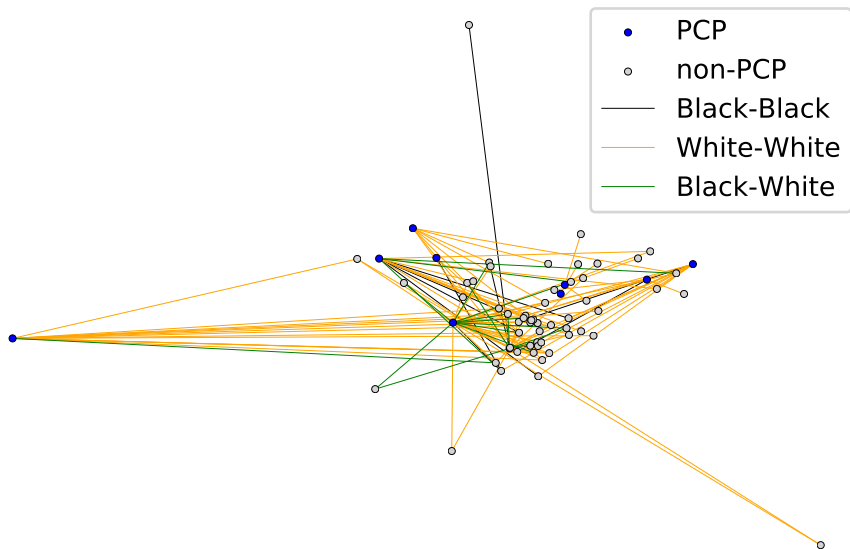

HRR: 4; Specialty: 2; Sample: 2

64

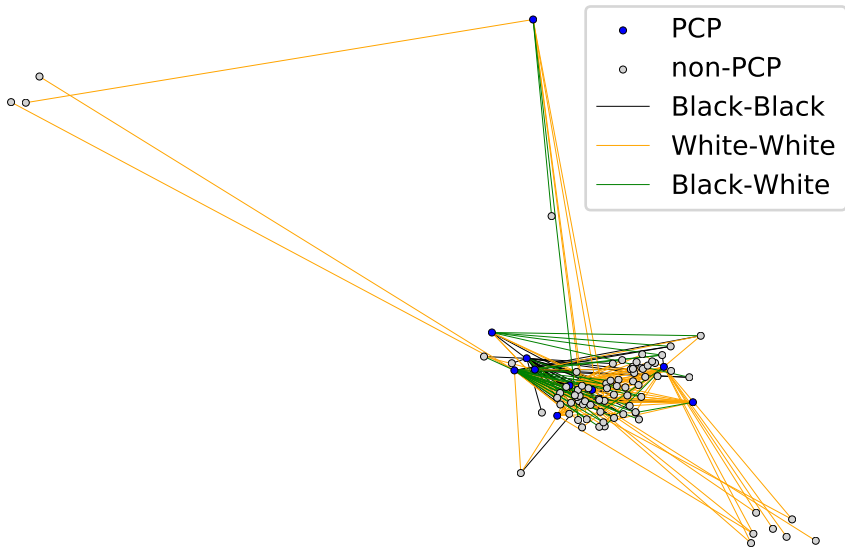



HRR: 4; Specialty: 2; Sample: 3

65

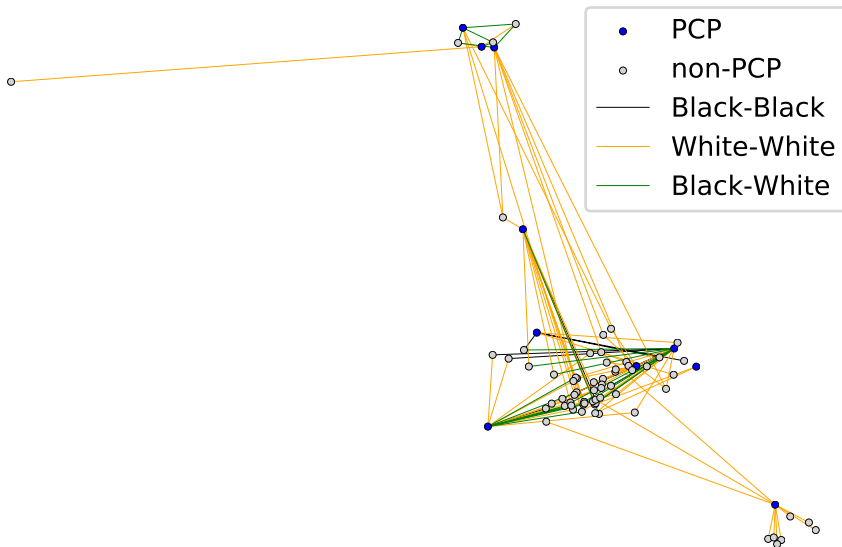

HRR: 4; Specialty: 3; Sample: 1

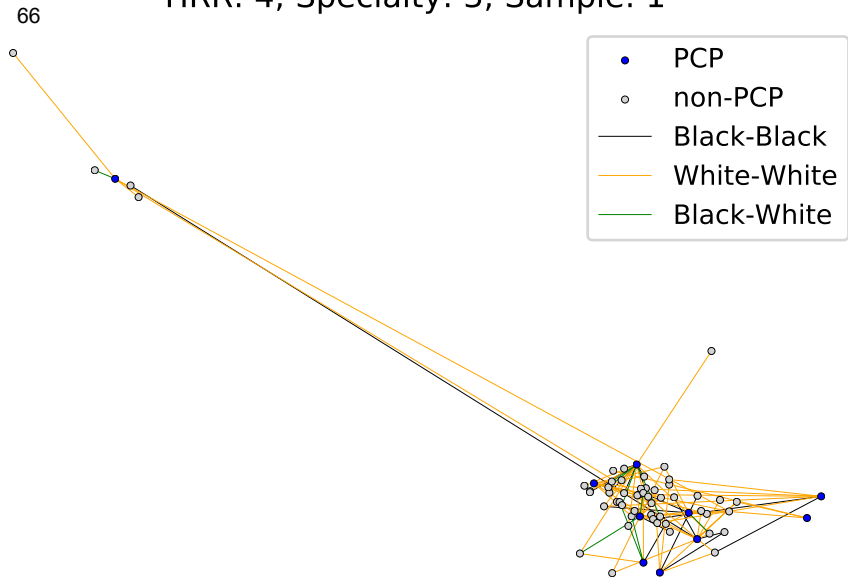

HRR: 4; Specialty: 3; Sample: 2

67

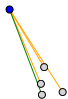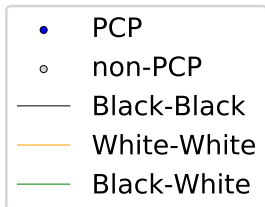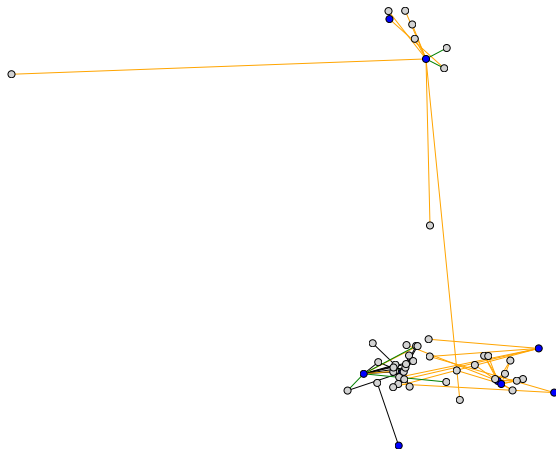

HRR: 4; Specialty: 3; Sample: 3

68

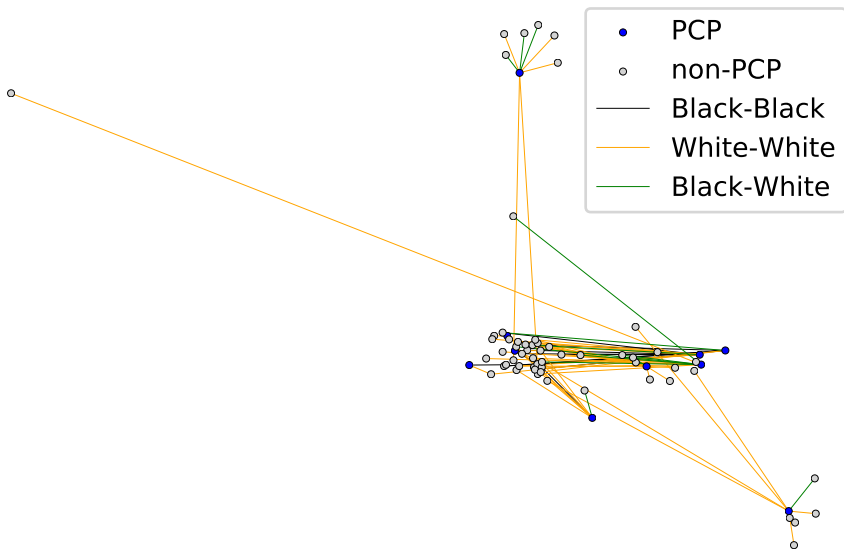

# HRR: 4; Specialty: 4; Sample: 1

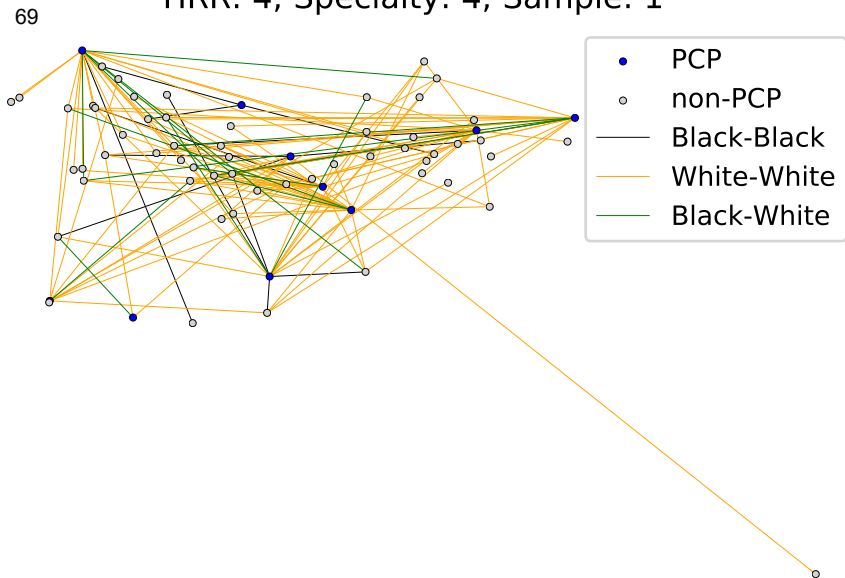

HRR: 4; Specialty: 4; Sample: 2

70

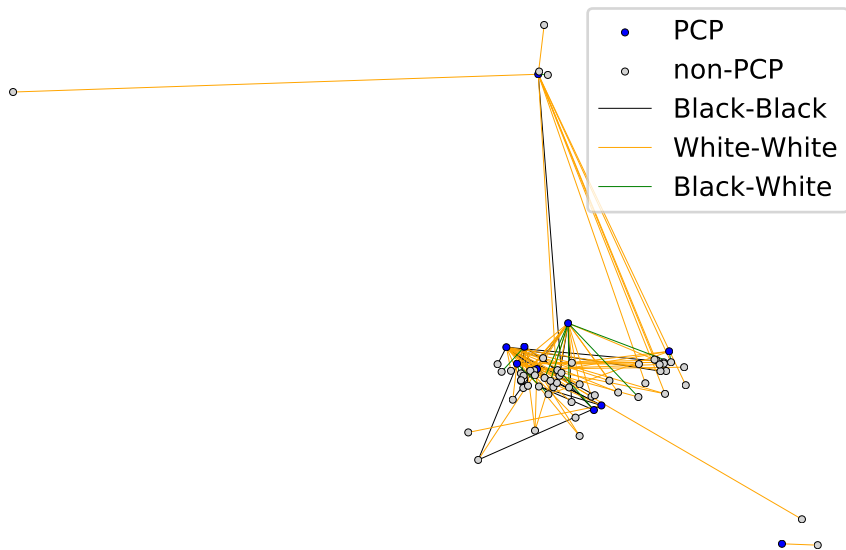

HRR: 4; Specialty: 4; Sample: 3

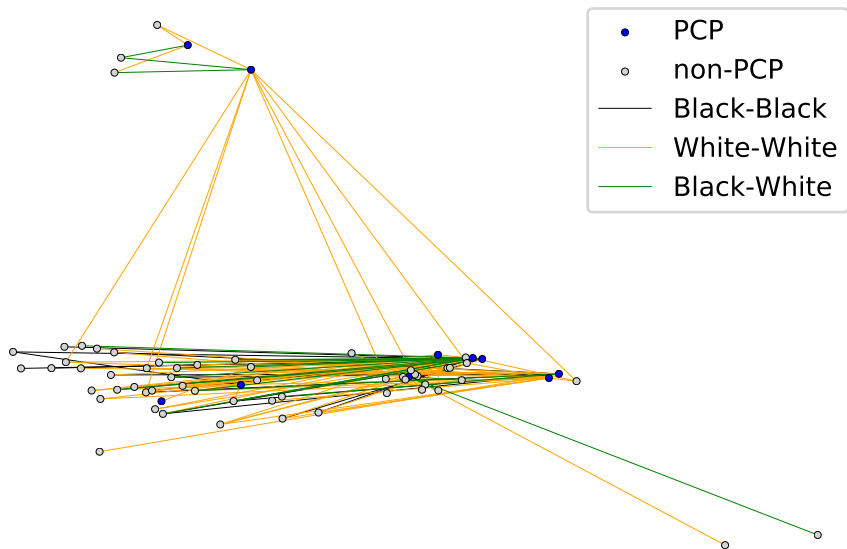

HRR: 4; Specialty: 5; Sample: 1

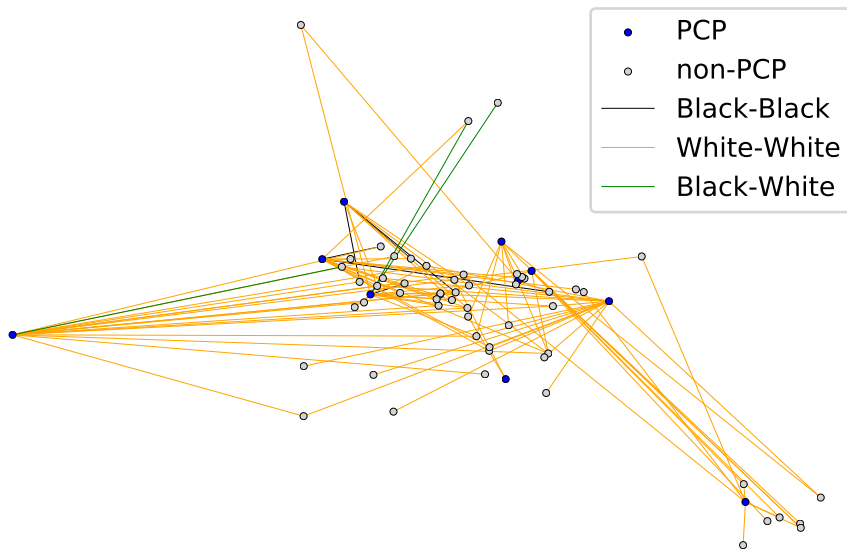



HRR: 4; Specialty: 5; Sample: 2

73

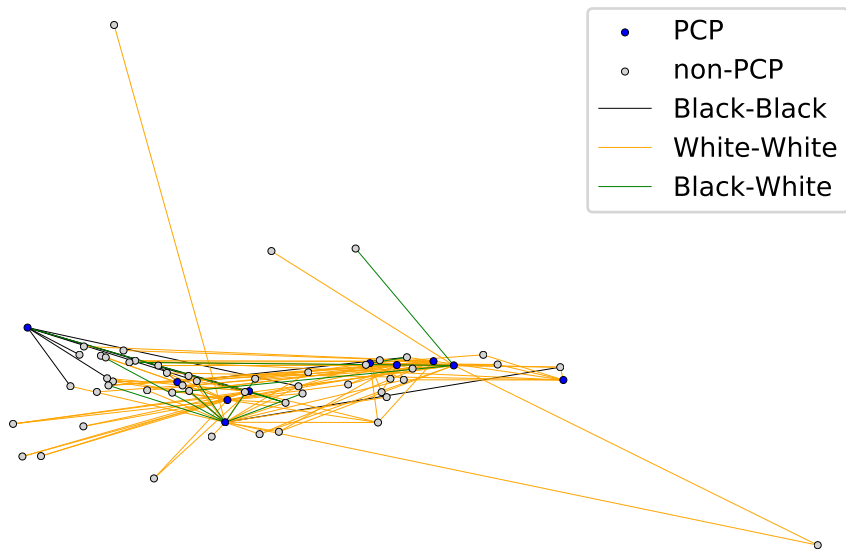

HRR: 4; Specialty: 5; Sample: 3

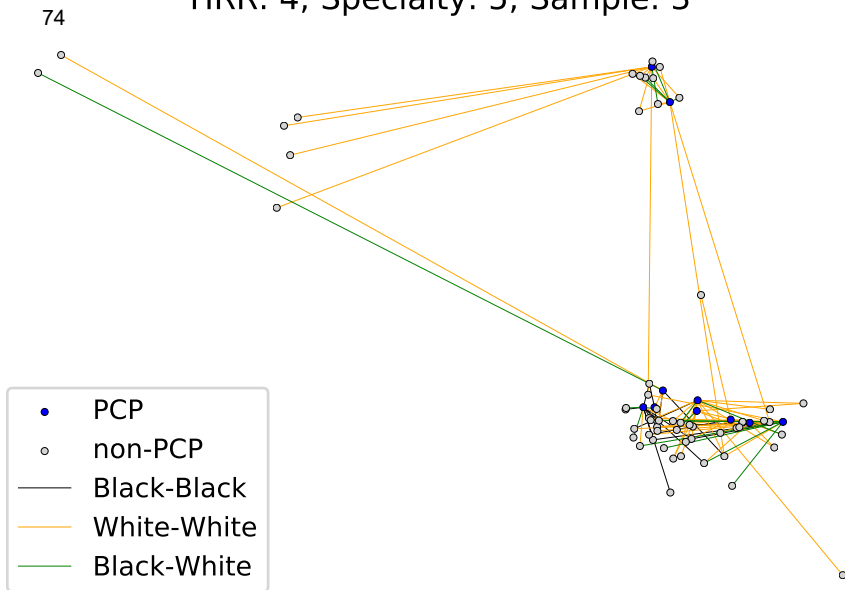

HRR: 4; Specialty: 6; Sample: 1

75

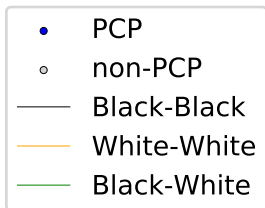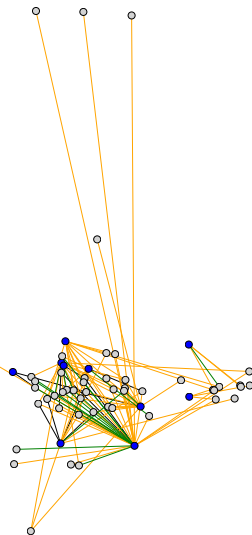

HRR: 4; Specialty: 6; Sample: 2

76

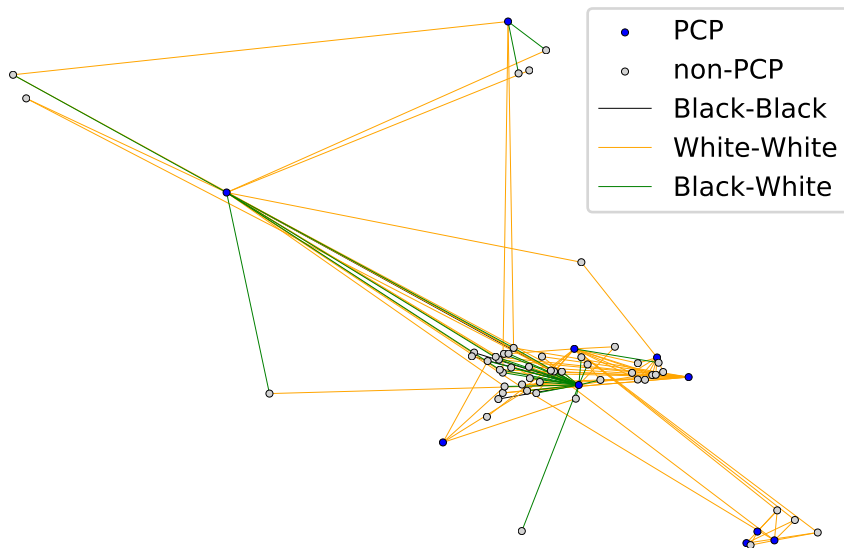

HRR: 4; Specialty: 6; Sample: 3

77

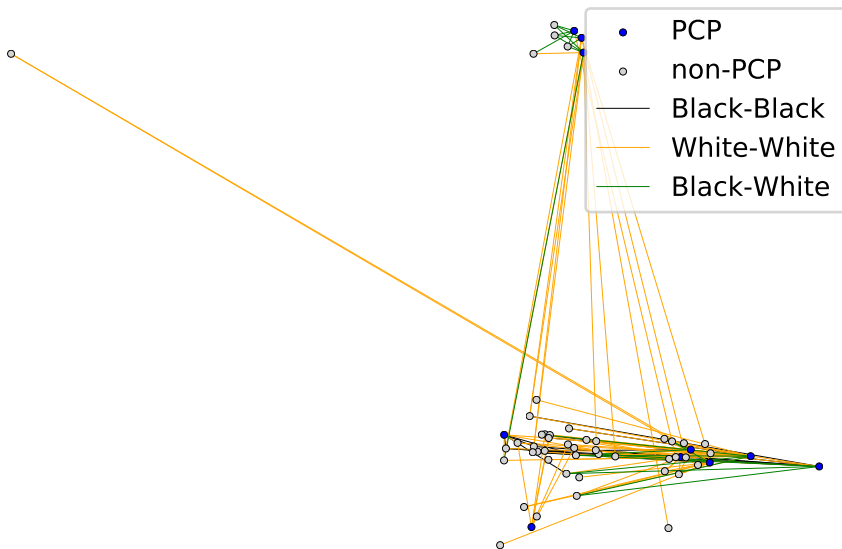

78

HRR: 5; Specialty: 1; Sample: 1

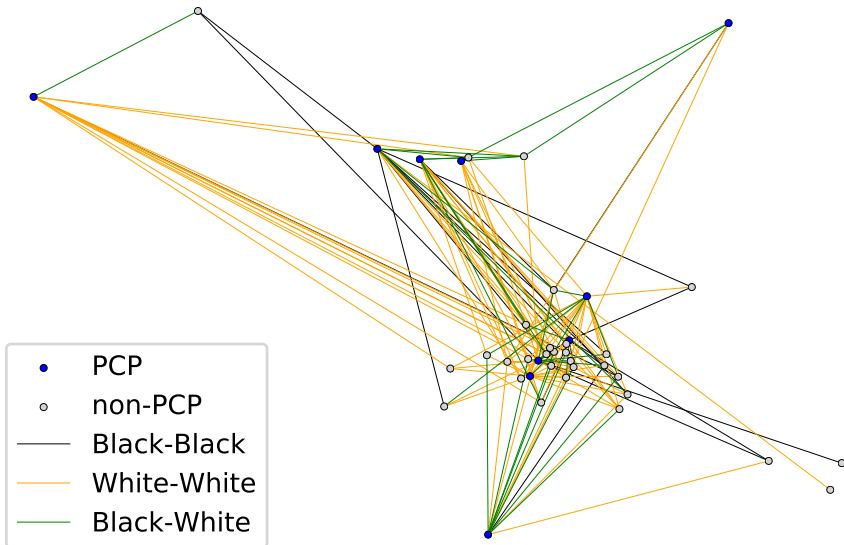

HRR: 5; Specialty: 1; Sample: 2

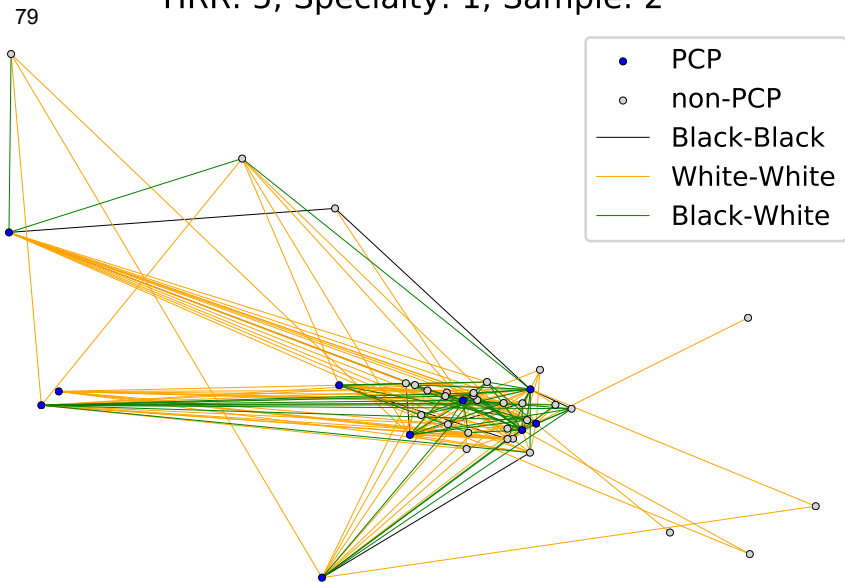

© 2021 Landon BE et al. JAMA Network Open.

HRR: 5; Specialty: 1; Sample: 3

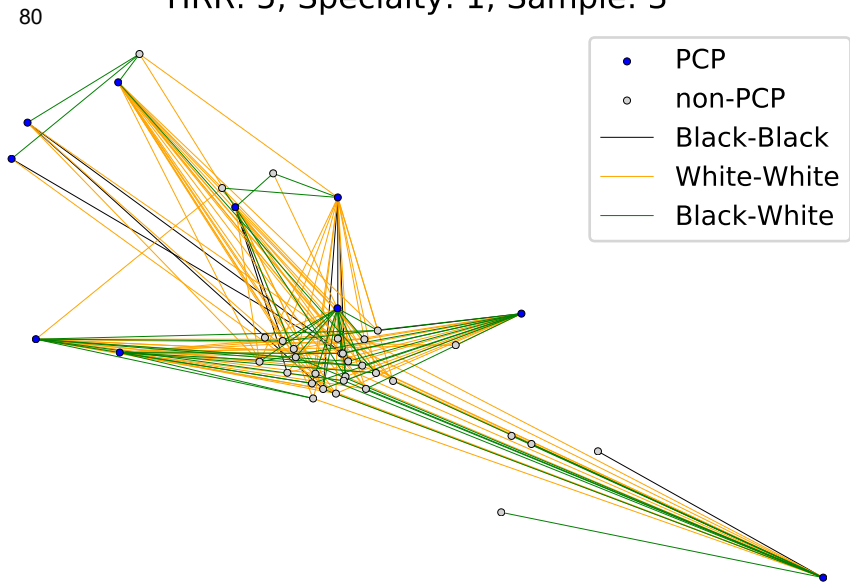



# HRR: 5; Specialty: 2; Sample: 1

81

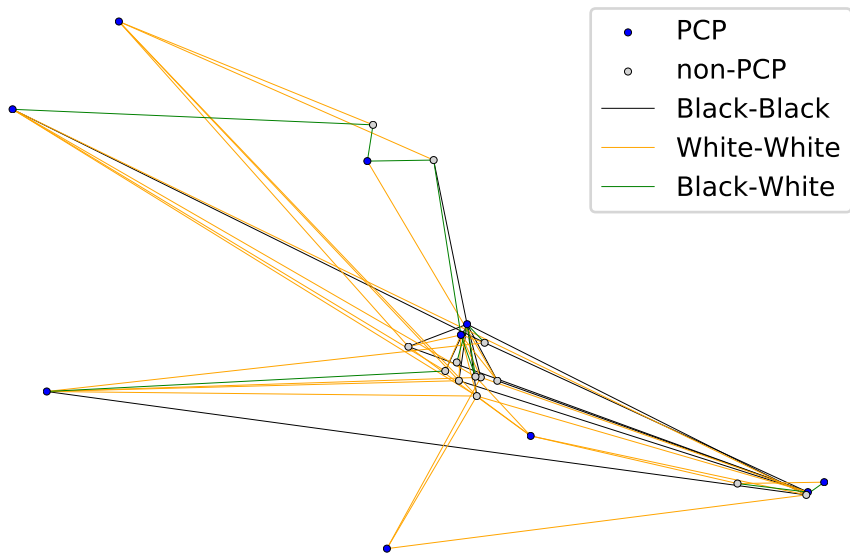

HRR: 5; Specialty: 2; Sample: 2

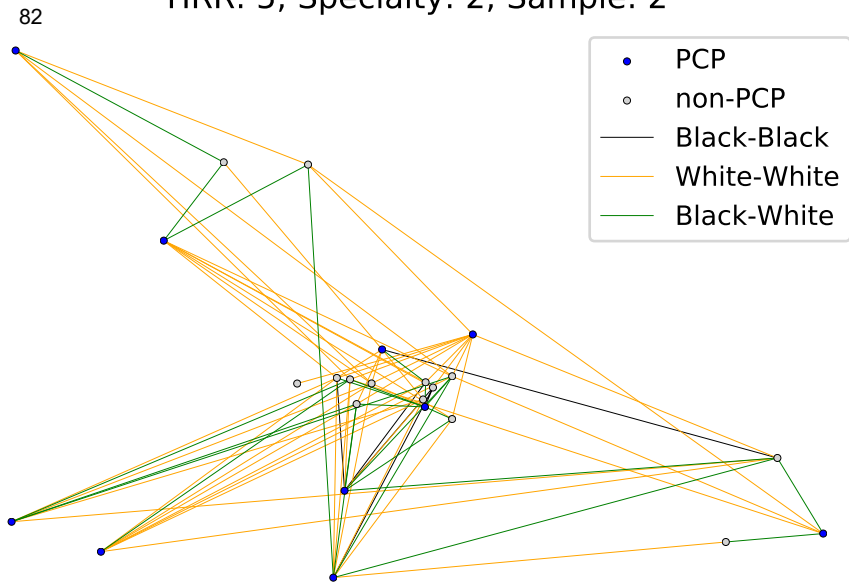

© 2021 Landon BE et al. JAMA Network Open.

HRR: 5; Specialty: 2; Sample: 3

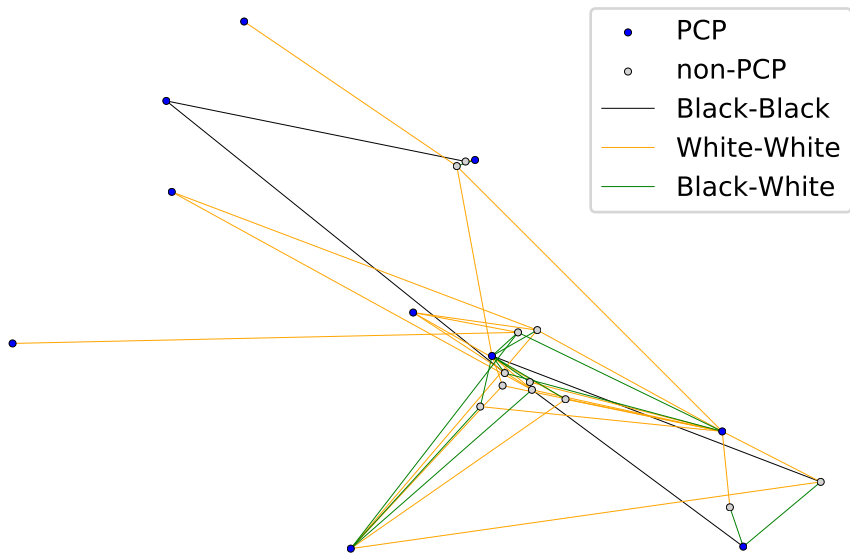

# HRR: 5; Specialty: 3; Sample: 1

84

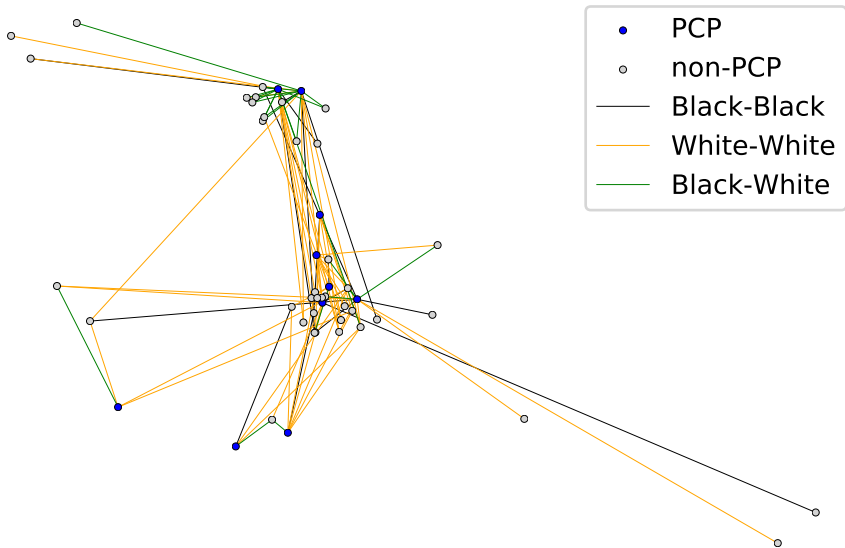

HRR: 5; Specialty: 3; Sample: 2

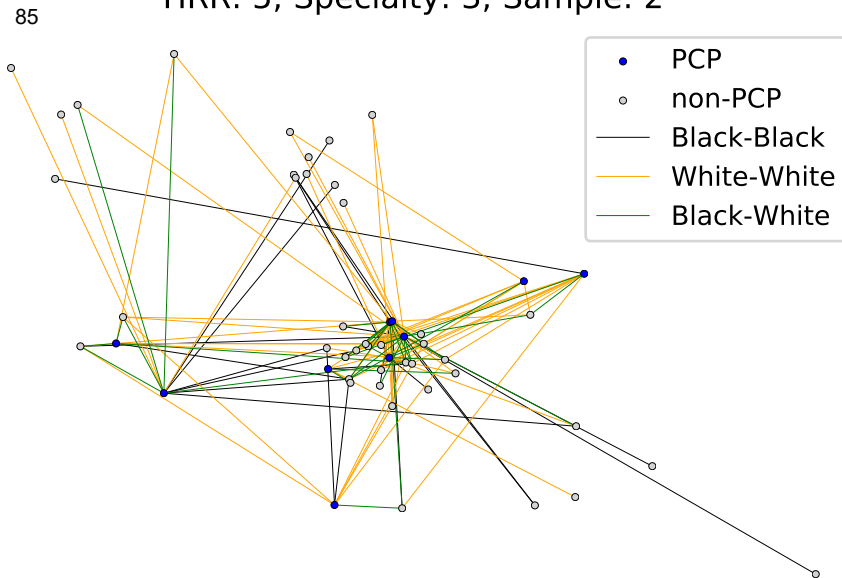

HRR: 5; Specialty: 3; Sample: 3

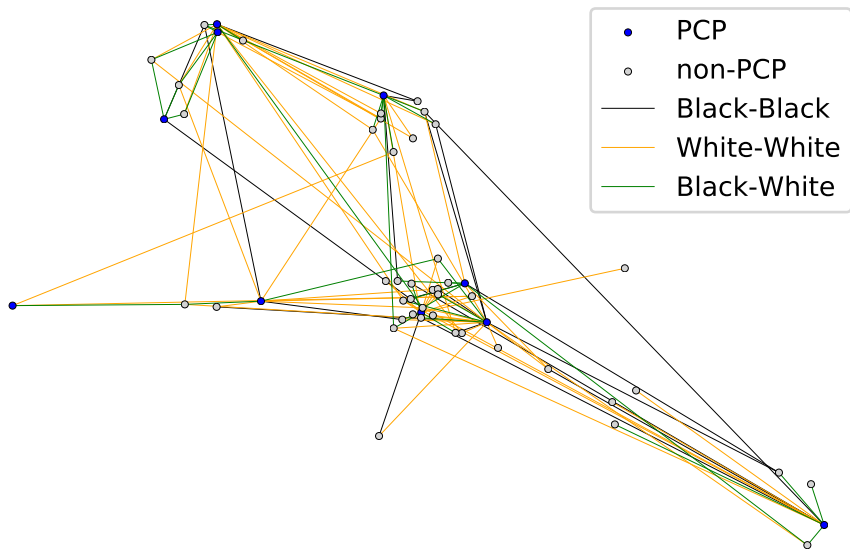

87

HRR: 5; Specialty: 4; Sample: 1

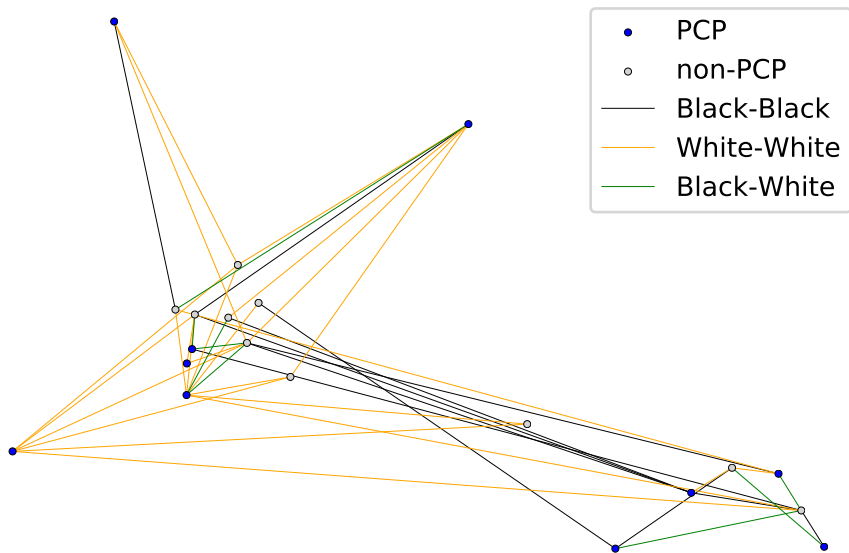

HRR: 5; Specialty: 4; Sample: 2

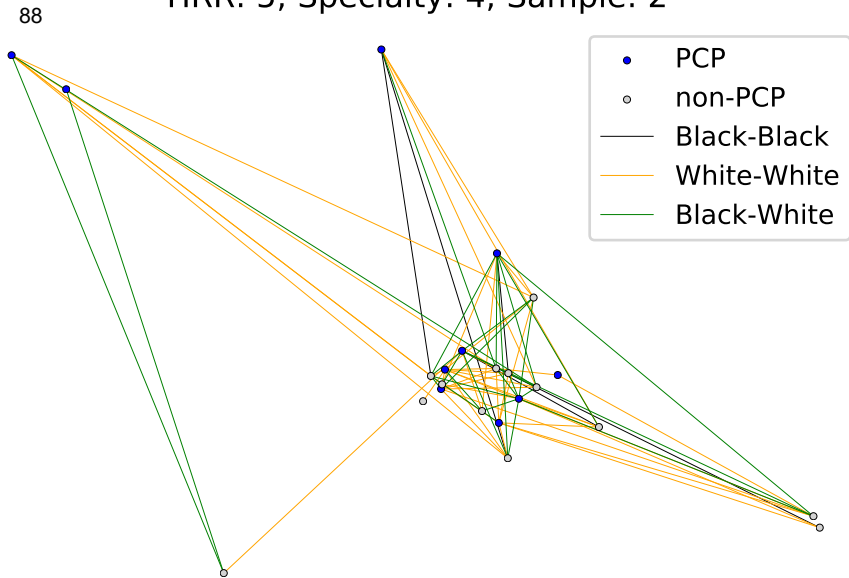



HRR: 5; Specialty: 4; Sample: 3

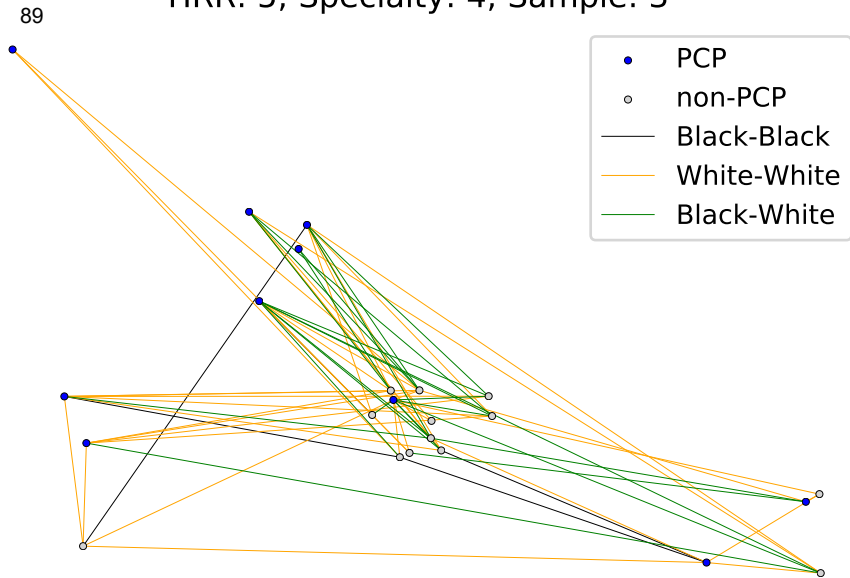

HRR: 5; Specialty: 5; Sample: 1

90

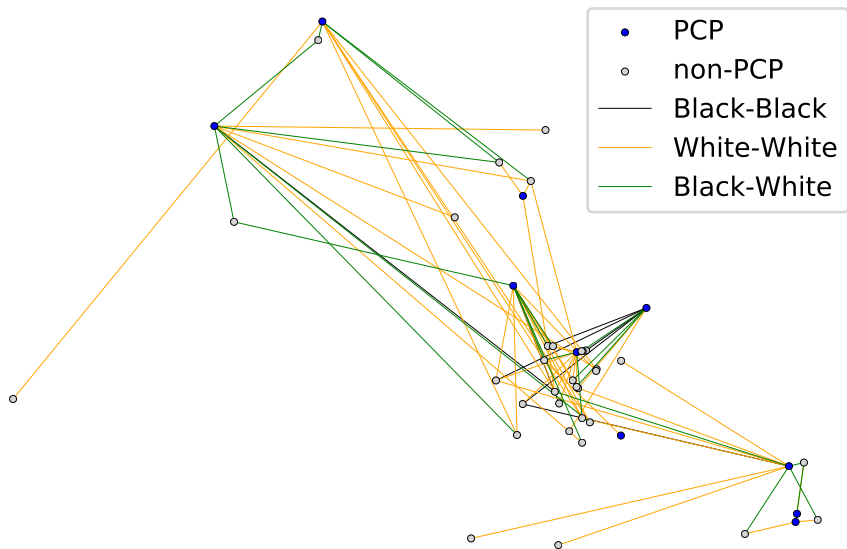

© 2021 Landon BE et al. JAMA Network Open.

HRR: 5; Specialty: 5; Sample: 2

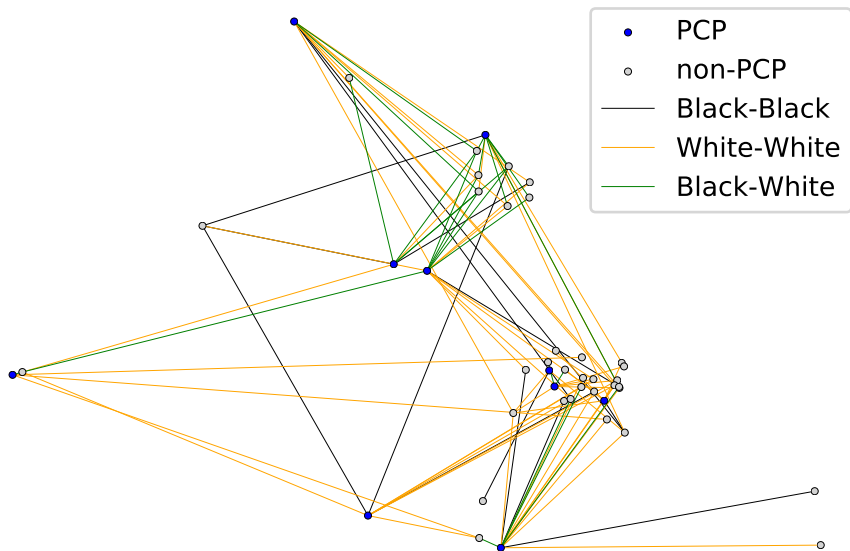

HRR: 5; Specialty: 5; Sample: 3

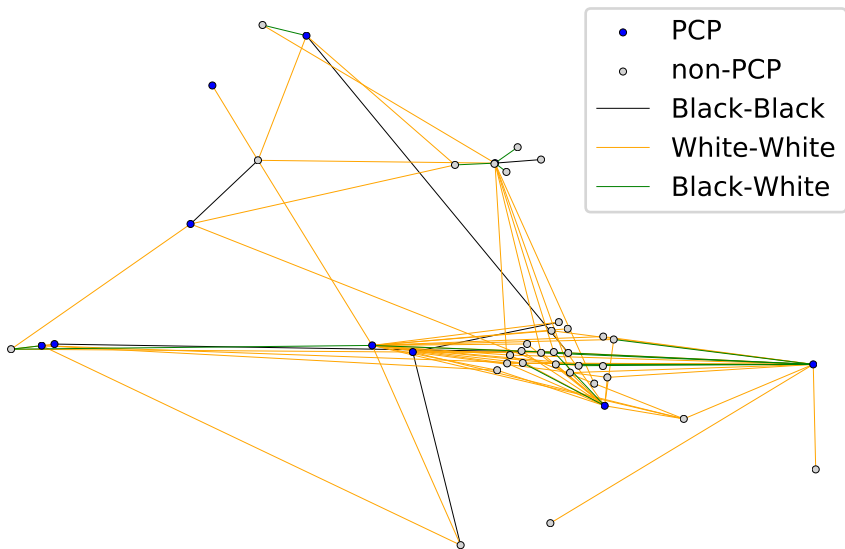

HRR: 5; Specialty: 6; Sample: 1

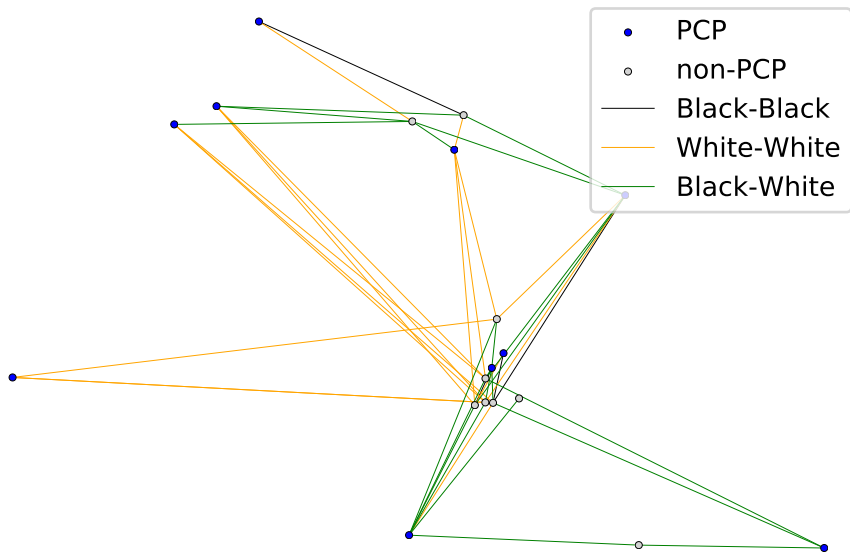

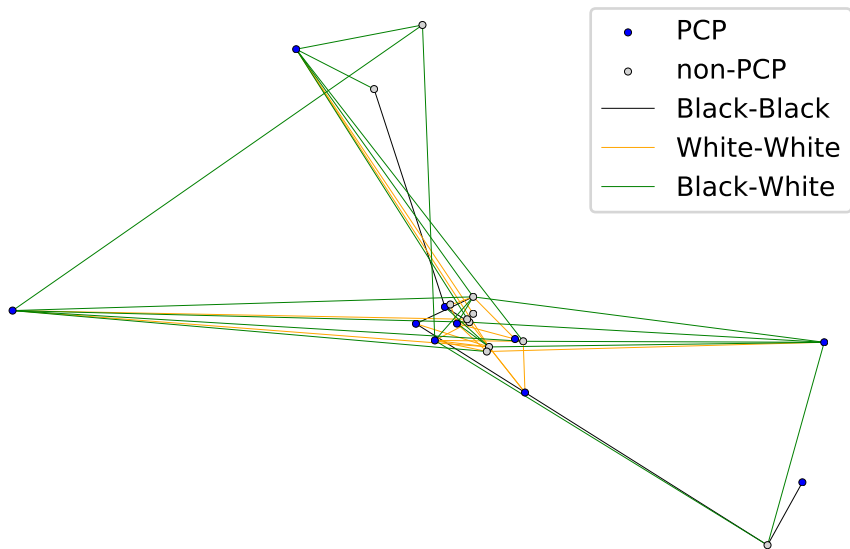

HRR: 5; Specialty: 6; Sample: 3

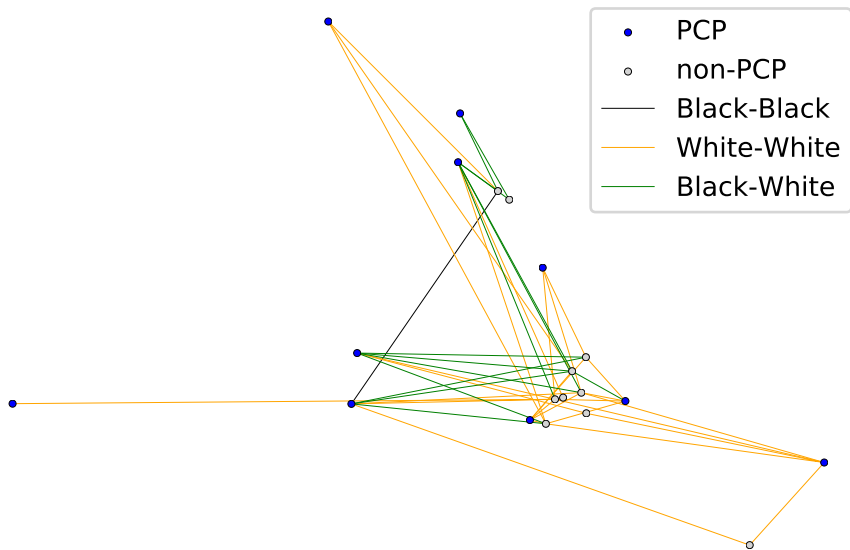

96

HRR: 6; Specialty: 1; Sample: 1

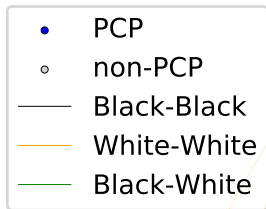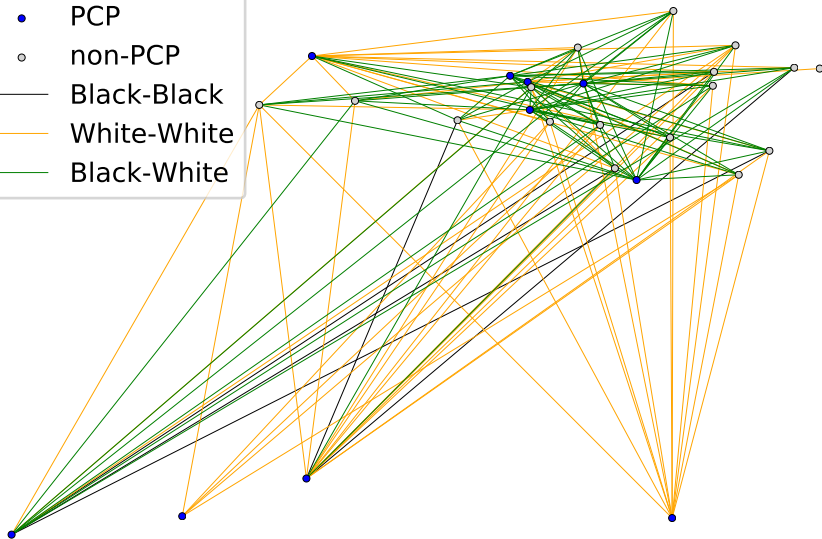



97

HRR: 6; Specialty: 1; Sample: 2

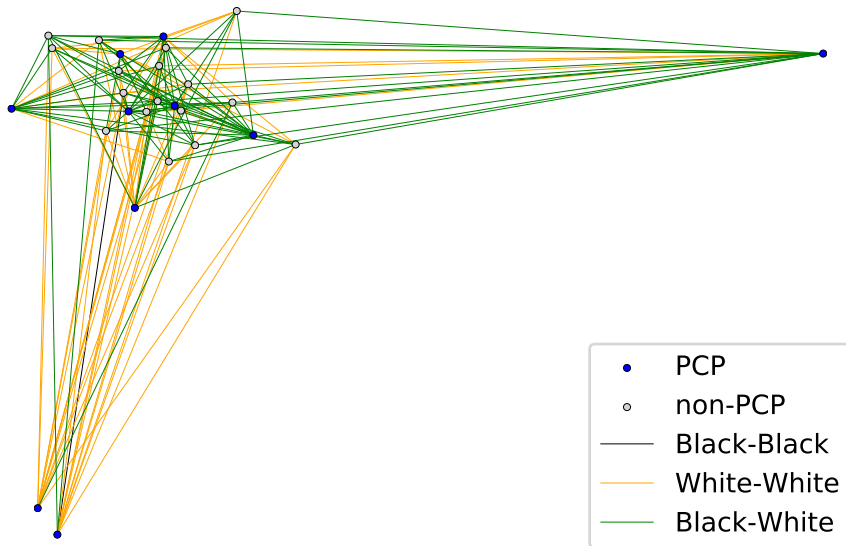

98

HRR: 6; Specialty: 1; Sample: 3

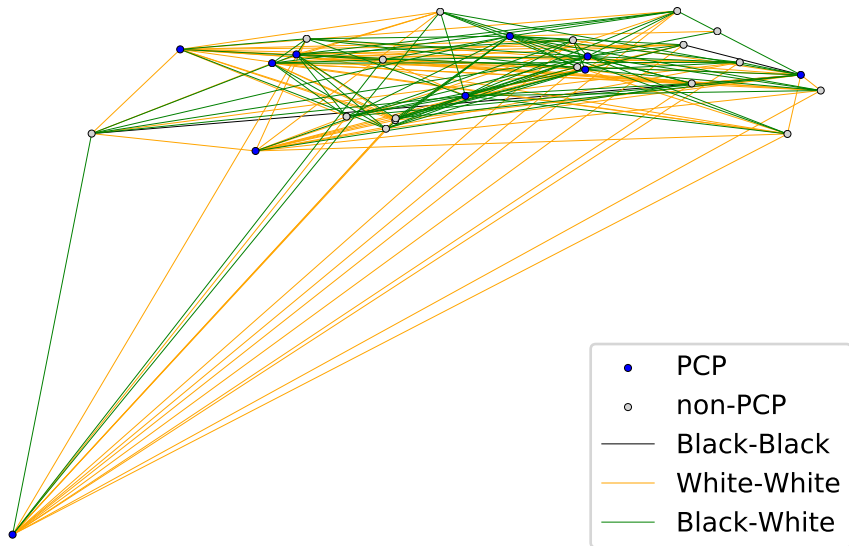

HRR: 6; Specialty: 2; Sample: 1

99

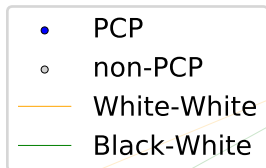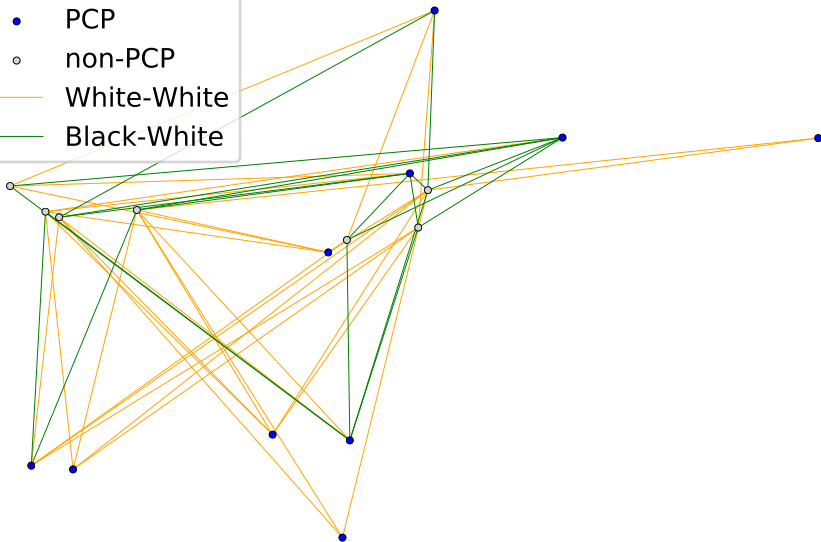

HRR: 6; Specialty: 2; Sample: 2

100

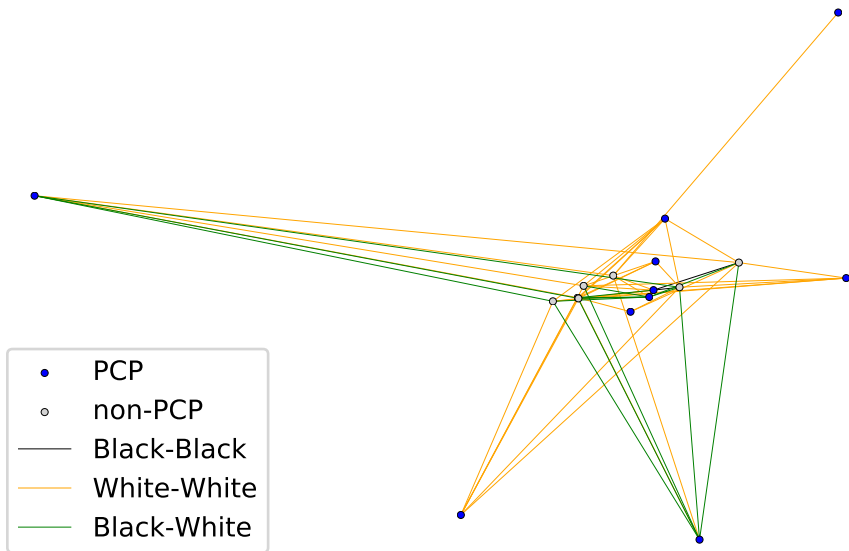

© 2021 Landon BE et al. JAMA Network Open.

HRR: 6; Specialty: 2; Sample: 3

101

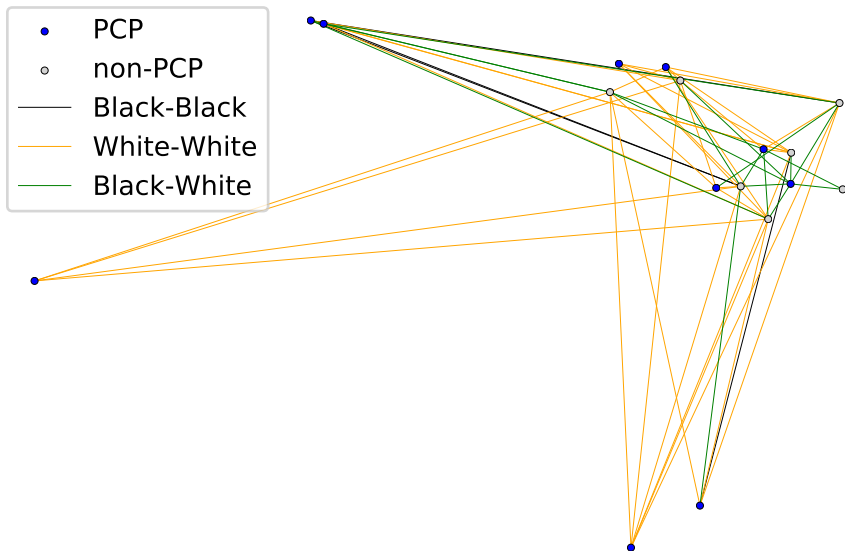

102

HRR: 6; Specialty: 3; Sample: 1

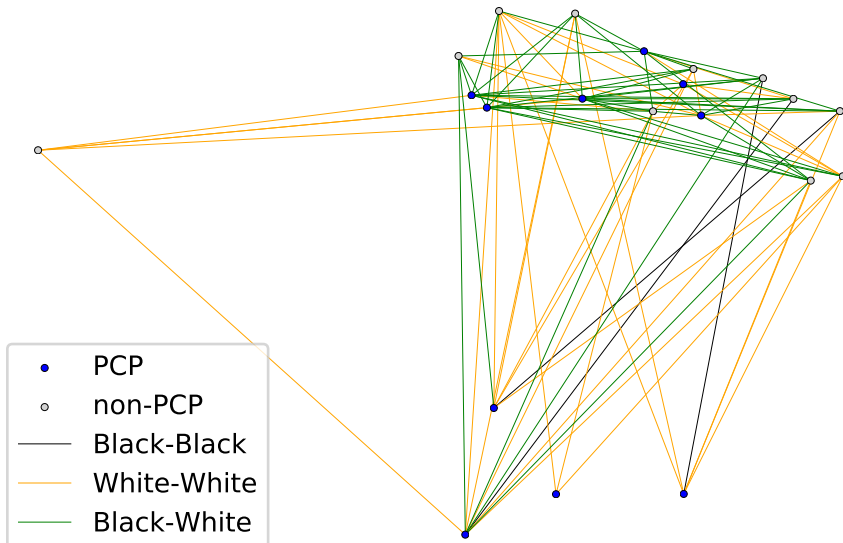

HRR: 6; Specialty: 3; Sample: 2

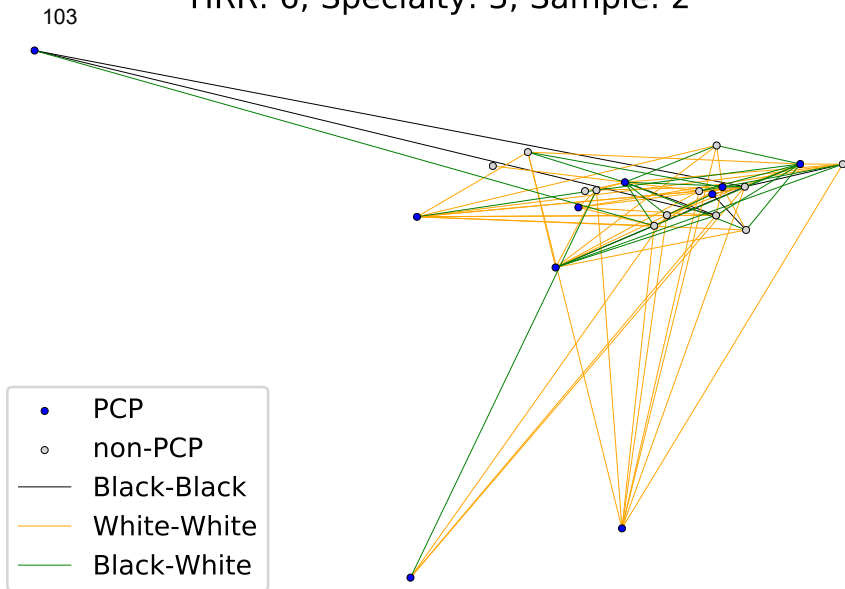

HRR: 6; Specialty: 3; Sample: 3

104

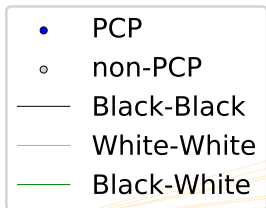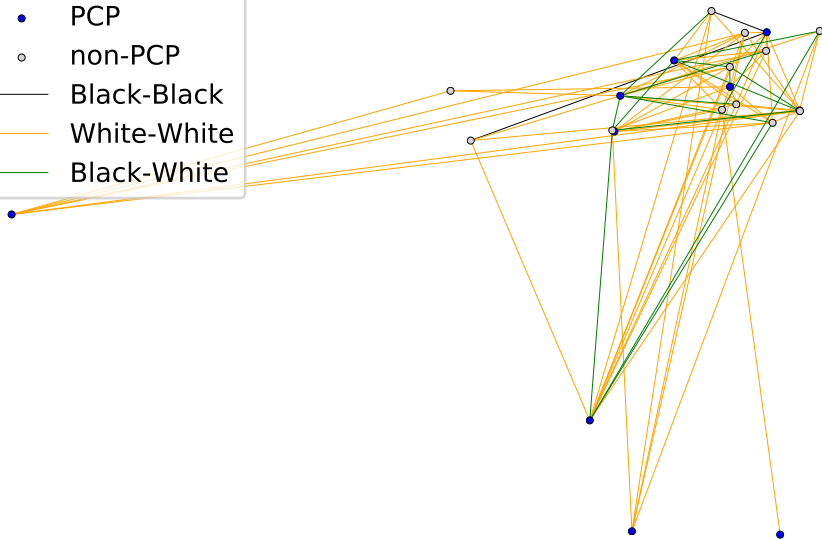



105

HRR: 6; Specialty: 4; Sample: 1

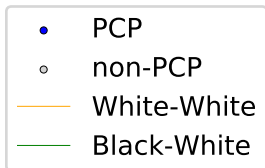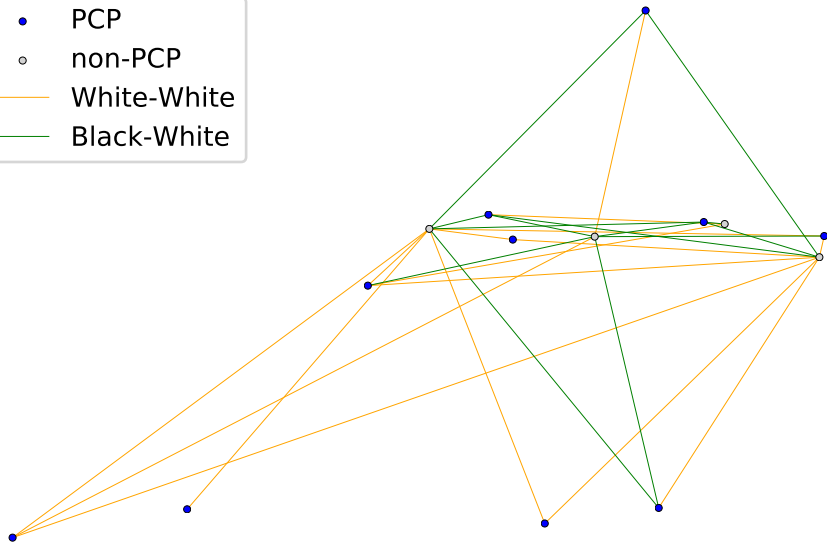

106

HRR: 6; Specialty: 4; Sample: 2

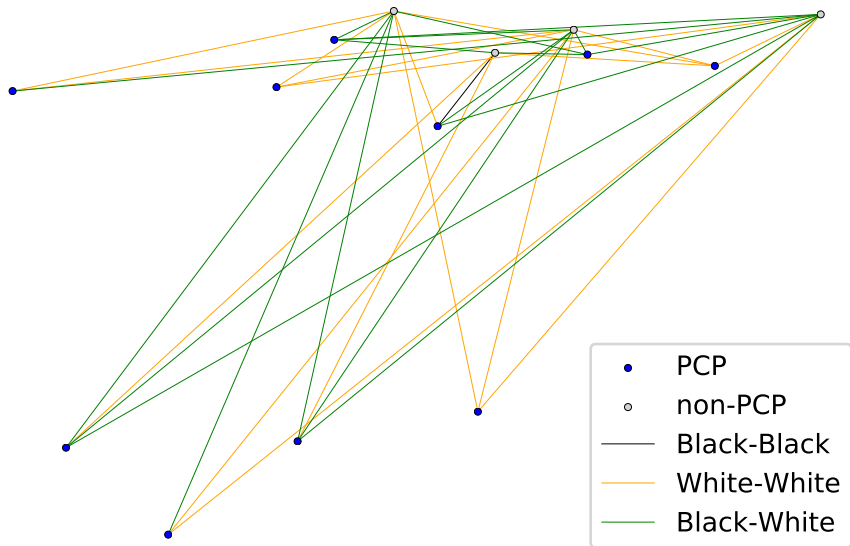

HRR: 6; Specialty: 4; Sample: 3

107

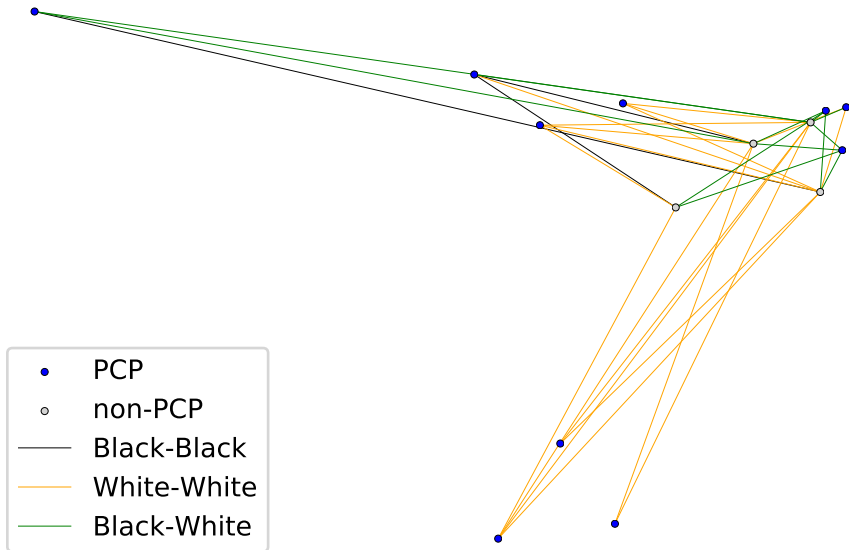

108

HRR: 6; Specialty: 5; Sample: 1

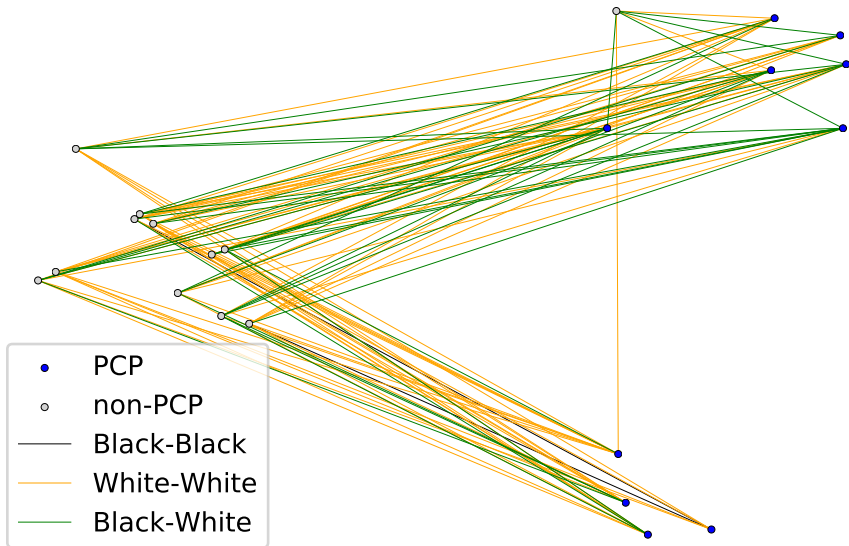

HRR: 6; Specialty: 5; Sample: 2

109

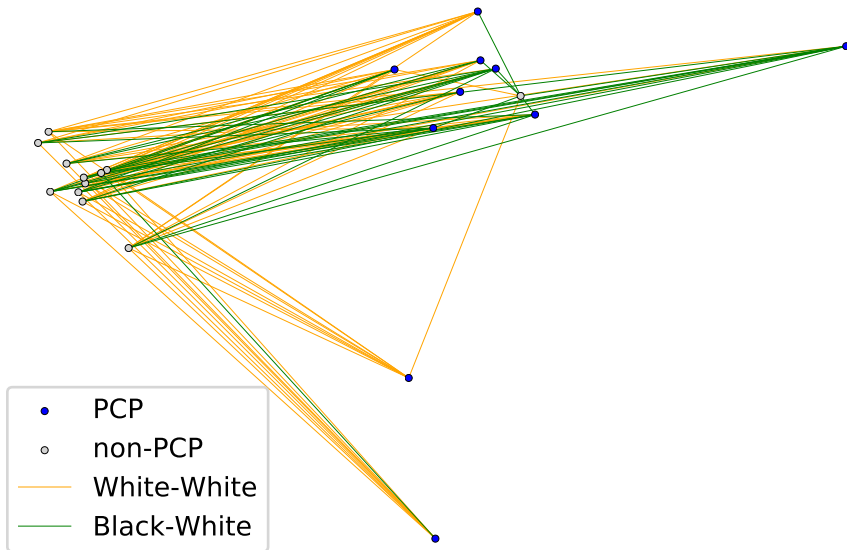

HRR: 6; Specialty: 5; Sample: 3

110

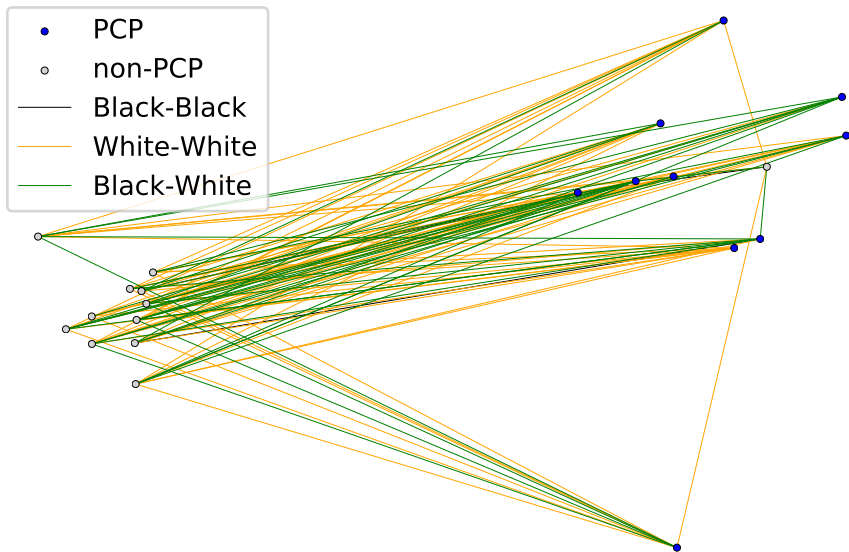

111

HRR: 6; Specialty: 6; Sample: 1

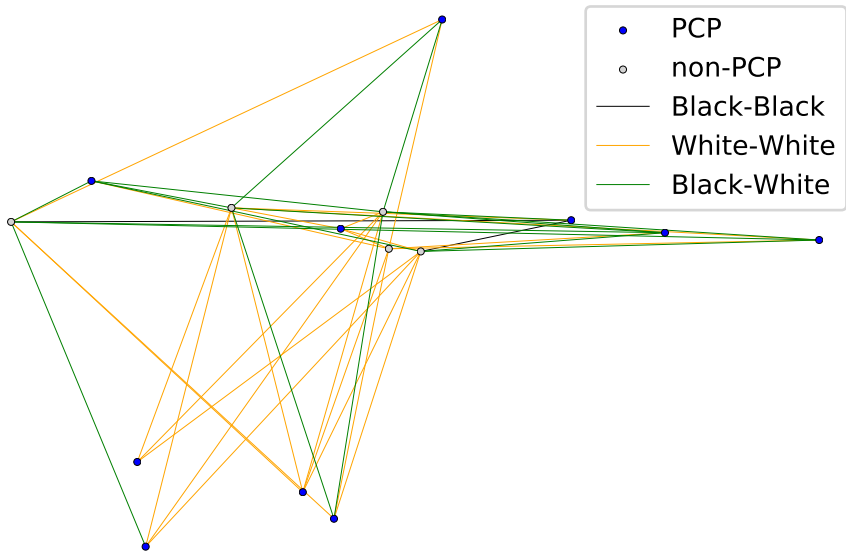

112

HRR: 6; Specialty: 6; Sample: 2

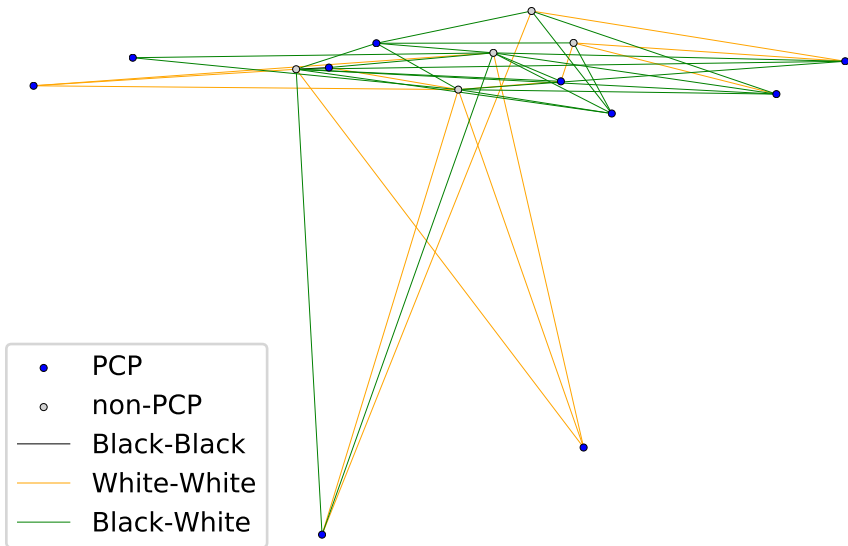



113

HRR: 6; Specialty: 6; Sample: 3

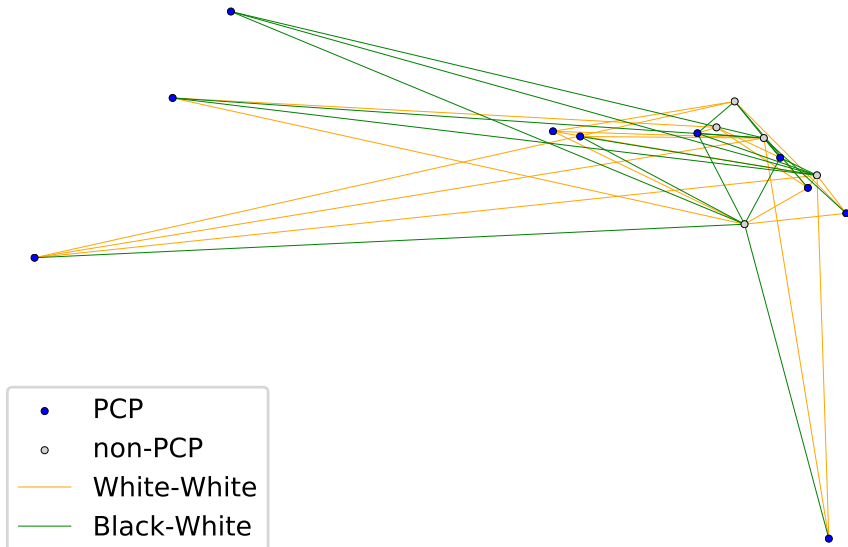

HRR: 7; Specialty: 1; Sample: 1

114

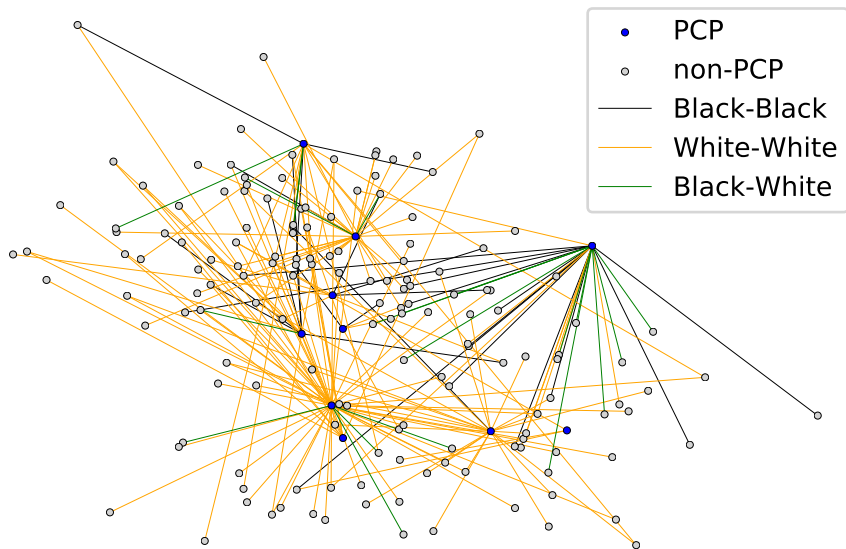

115

HRR: 7; Specialty: 1; Sample: 2

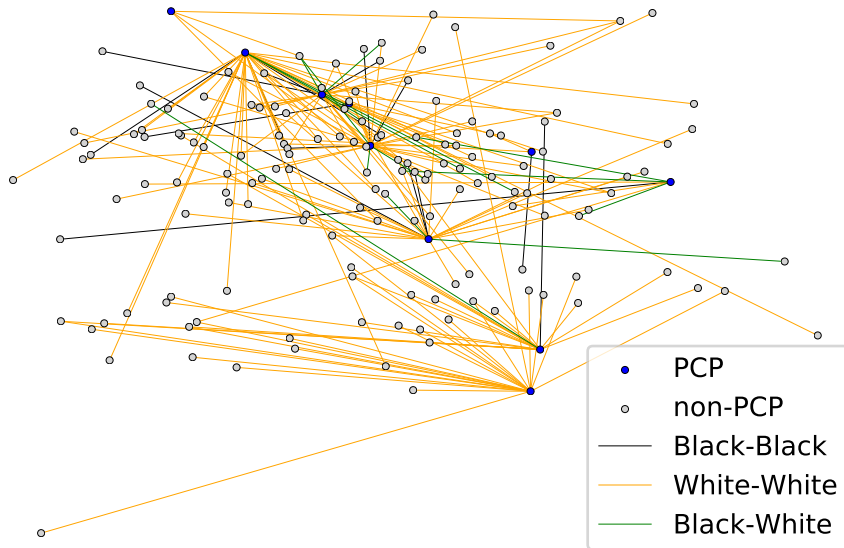

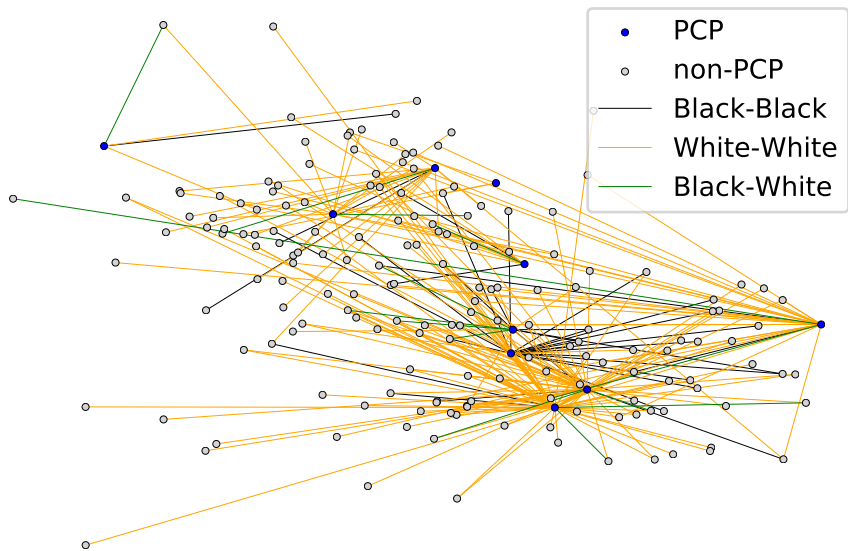

117

HRR: 7; Specialty: 2; Sample: 1

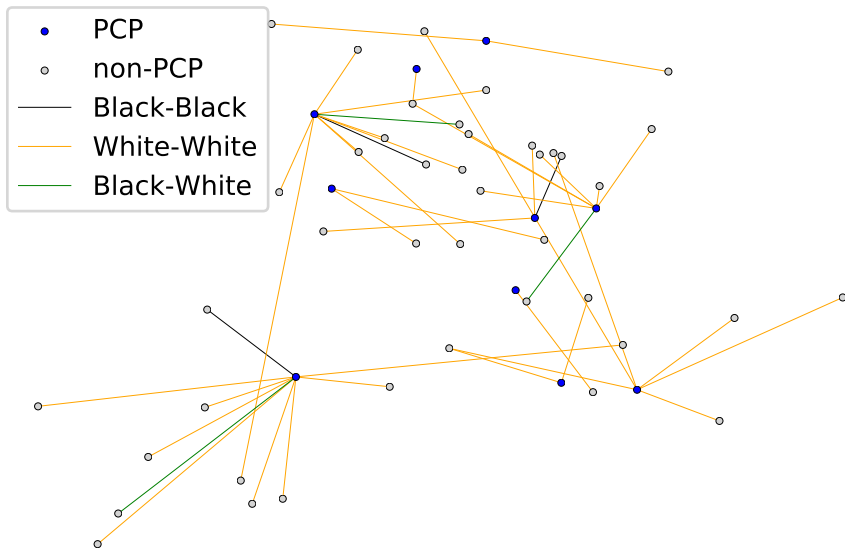

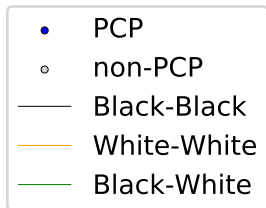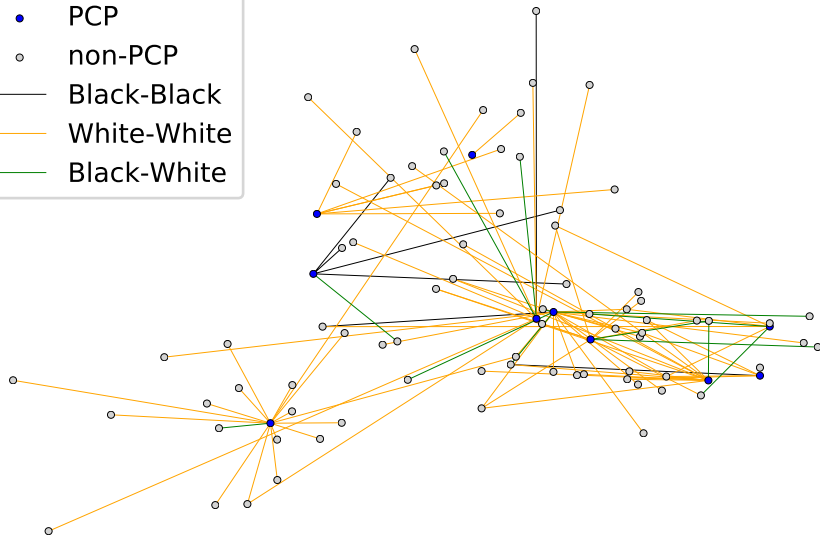

HRR: 7; Specialty: 2; Sample: 3

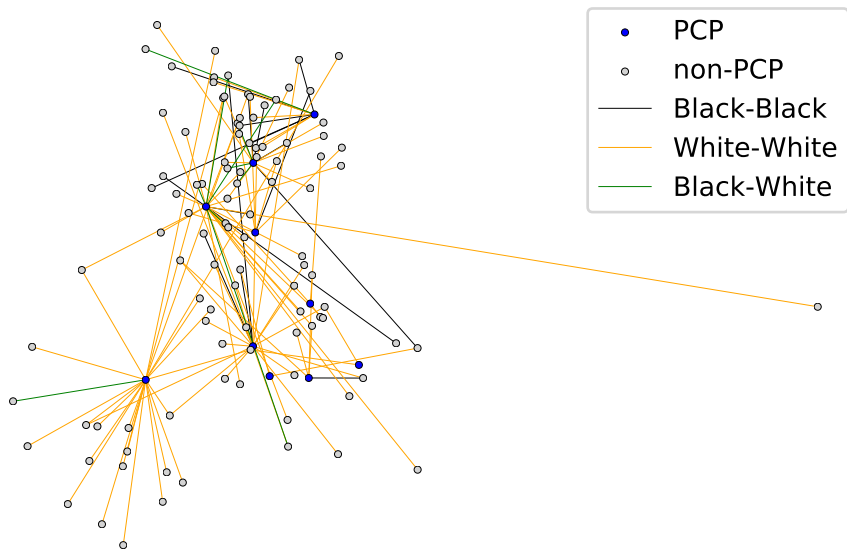

HRR: 7; Specialty: 3; Sample: 1

120

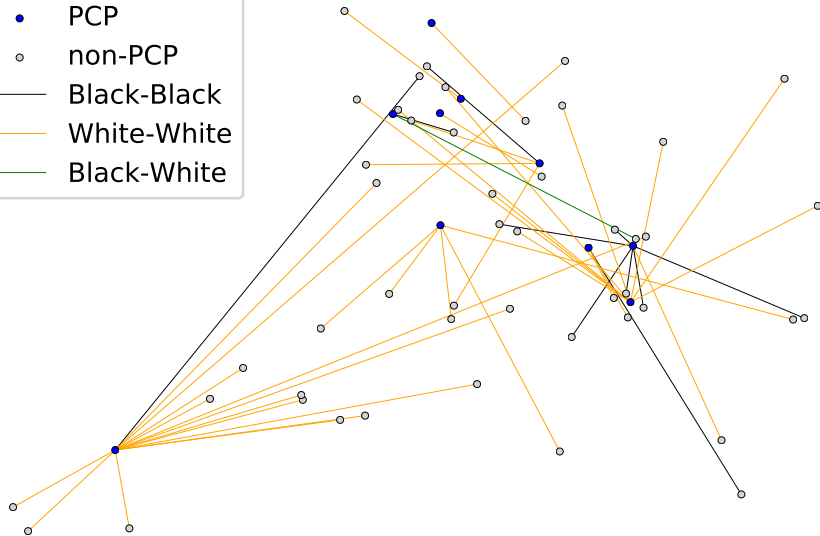



HRR: 7; Specialty: 3; Sample: 2

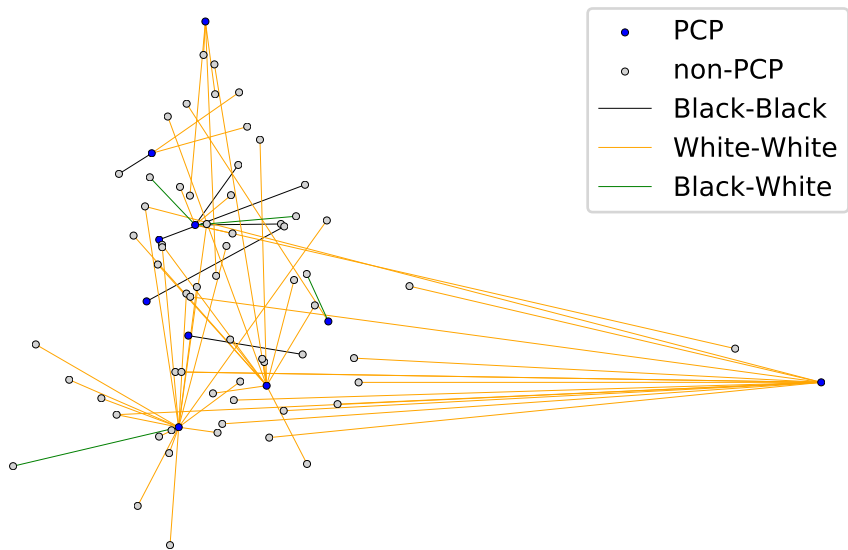

122

HRR: 7; Specialty: 3; Sample: 3

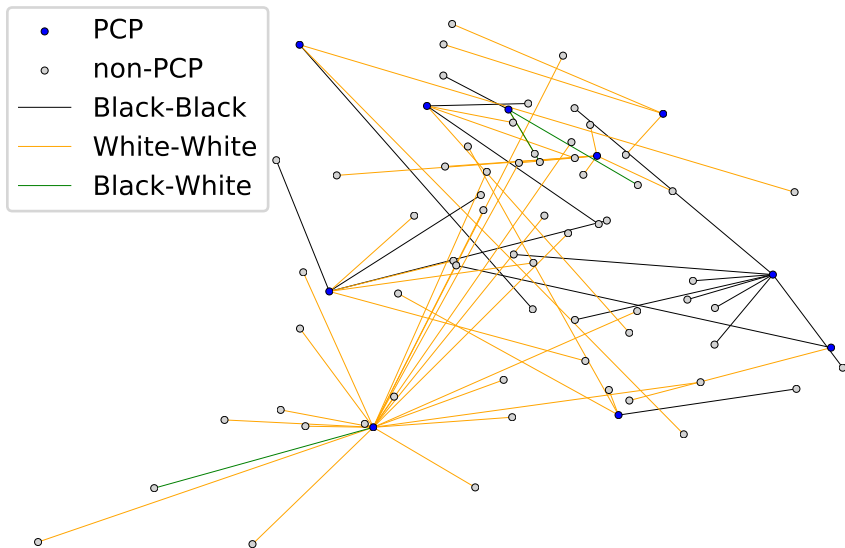

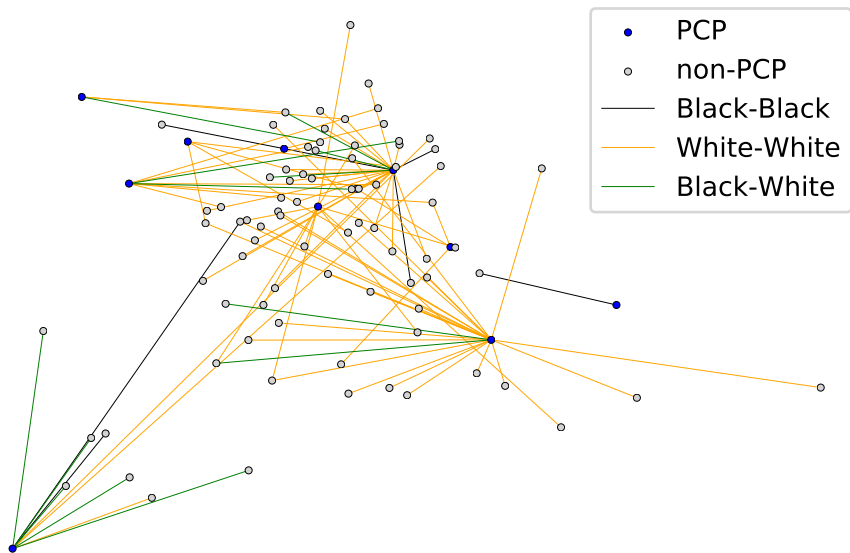

124

HRR: 7; Specialty: 4; Sample: 2

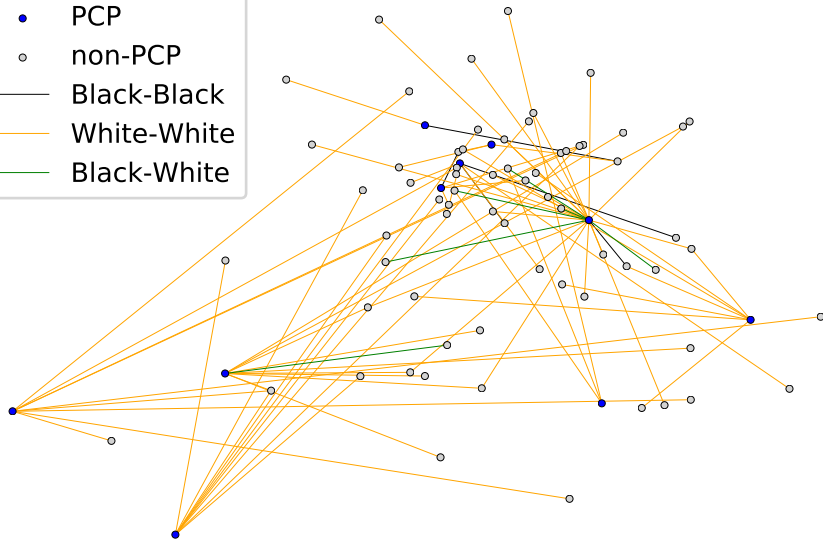

HRR: 7; Specialty: 4; Sample: 3

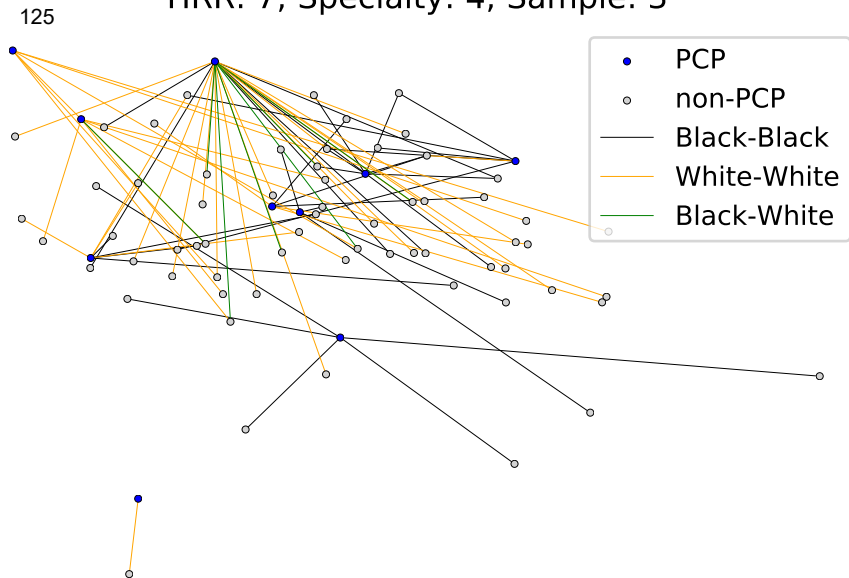

126

HRR: 7; Specialty: 5; Sample: 1

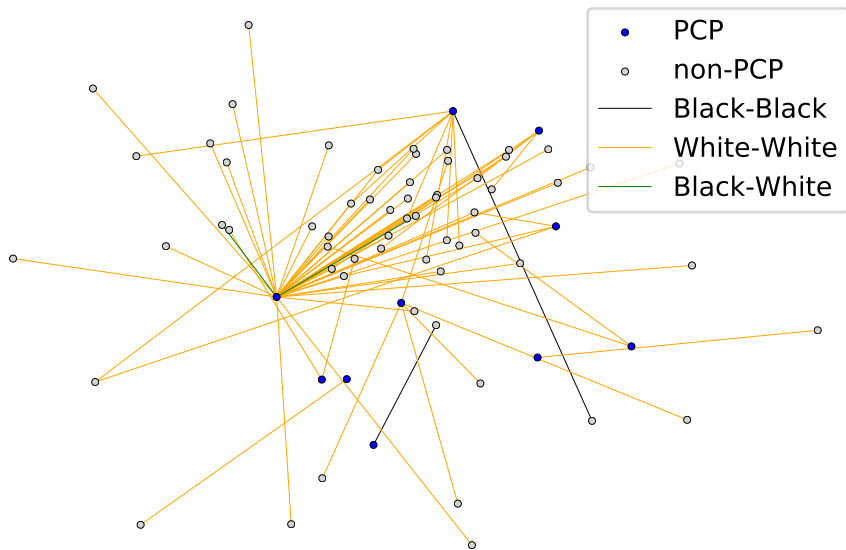

127

HRR: 7; Specialty: 5; Sample: 2

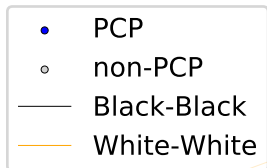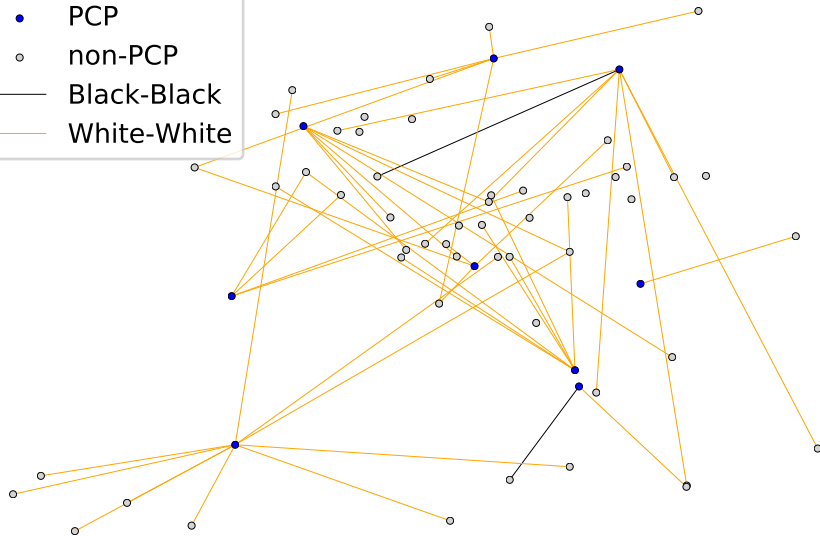

128

HRR: 7; Specialty: 5; Sample: 3

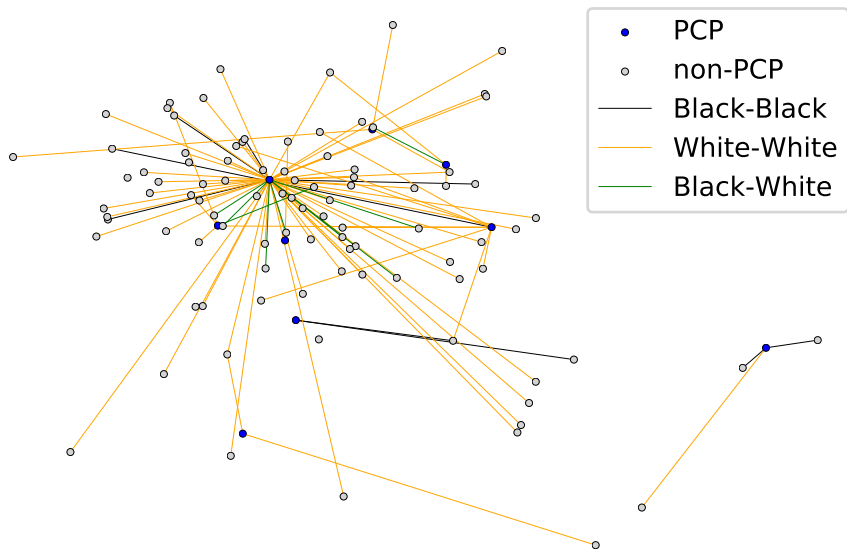



## HRR: 7; Specialty: 6; Sample: 1

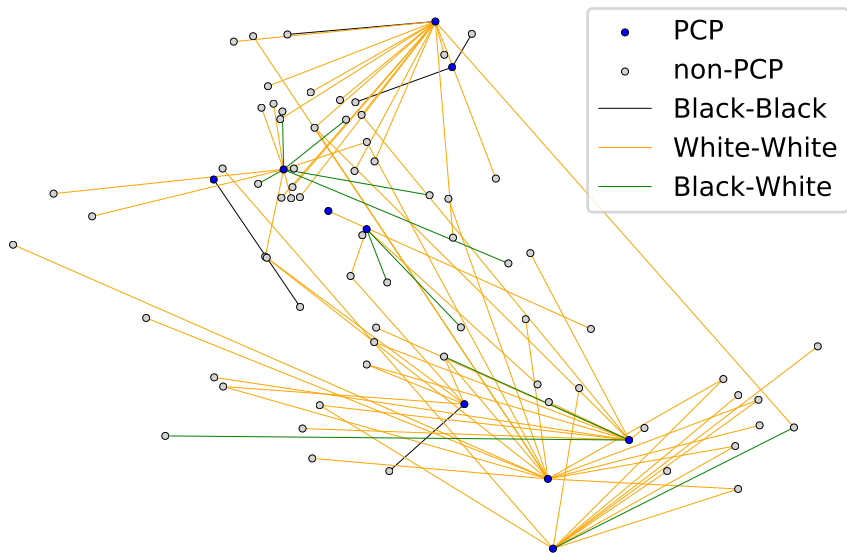

130

HRR: 7; Specialty: 6; Sample: 2

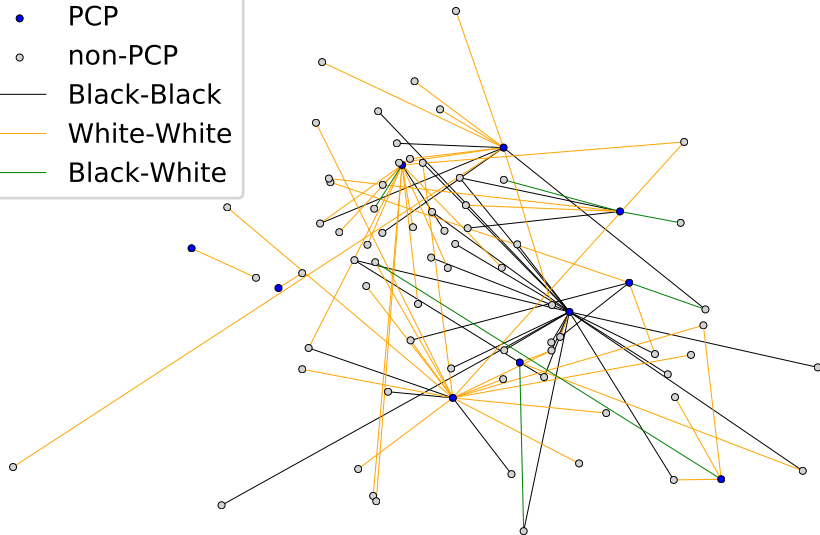

131

HRR: 7; Specialty: 6; Sample: 3

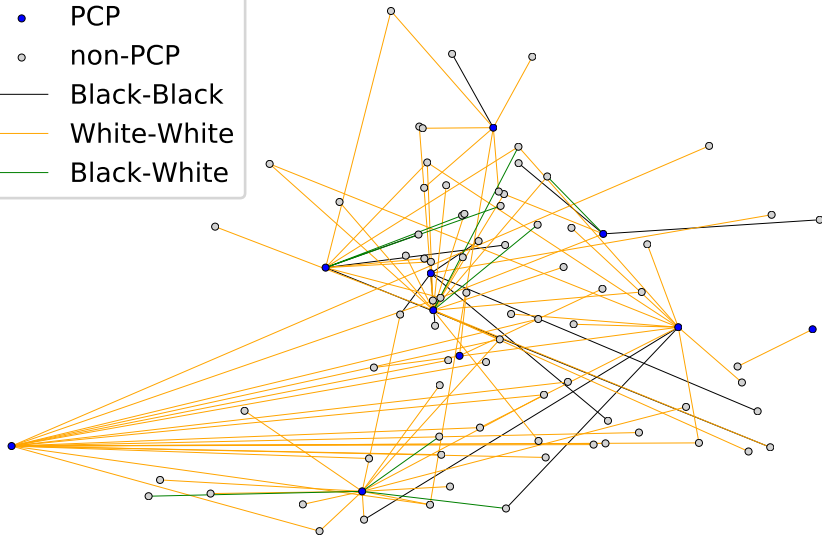

132

HRR: 8; Specialty: 1; Sample: 1

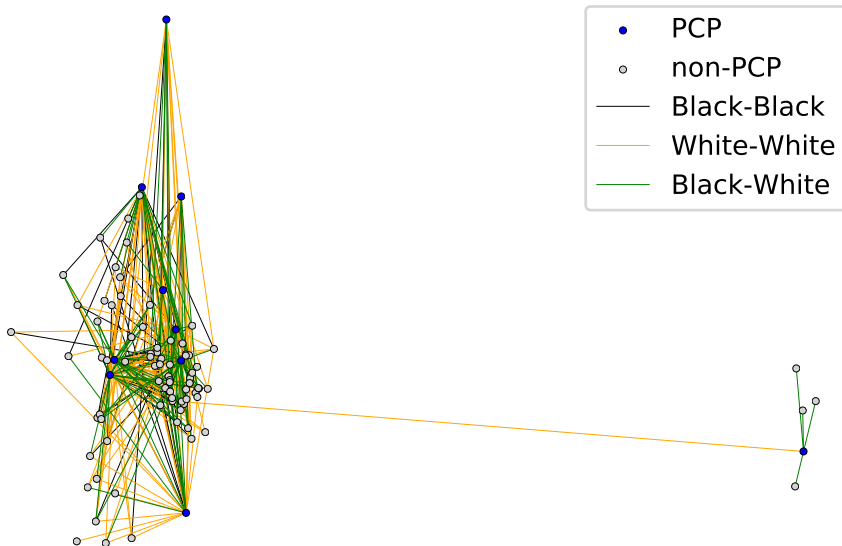

HRR: 8; Specialty: 1; Sample: 2

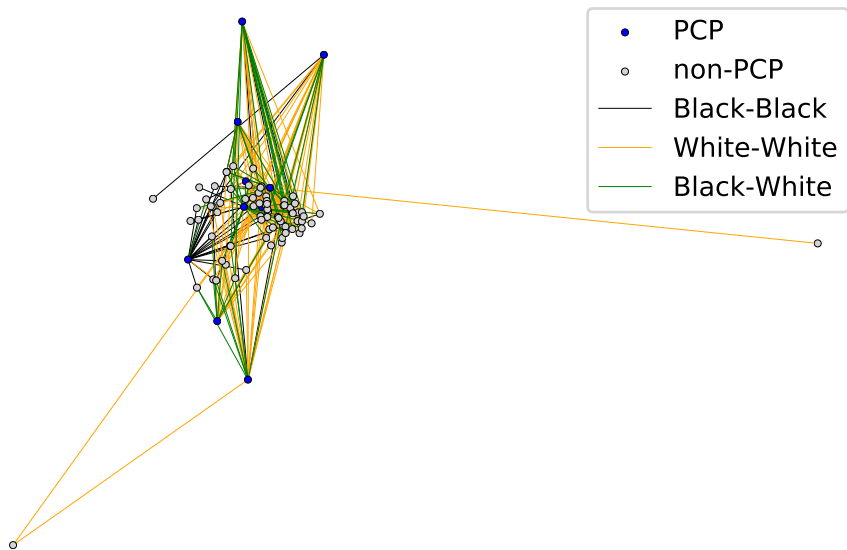

HRR: 8; Specialty: 1; Sample: 3

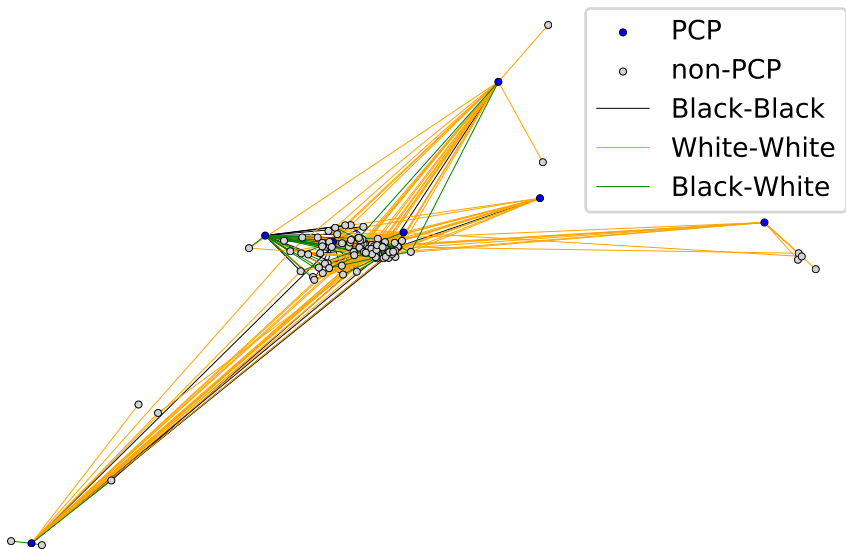

HRR: 8; Specialty: 2; Sample: 1

135

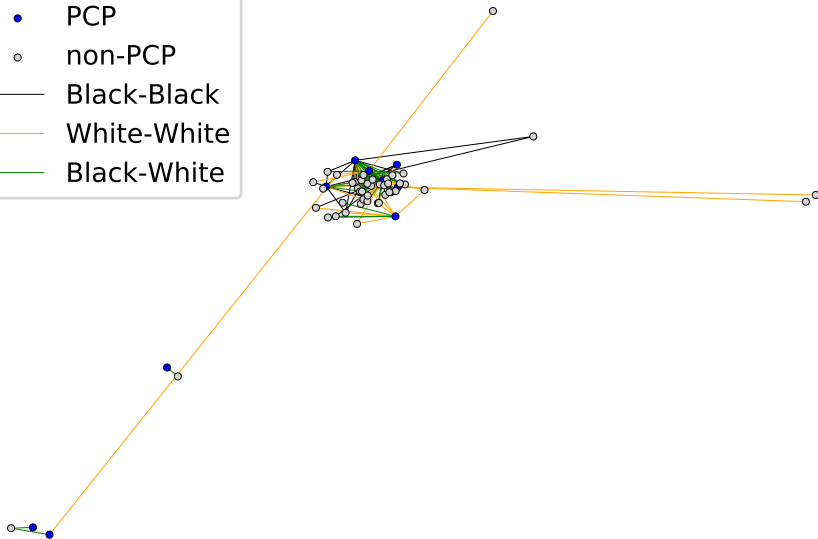

HRR: 8; Specialty: 2; Sample: 2

136

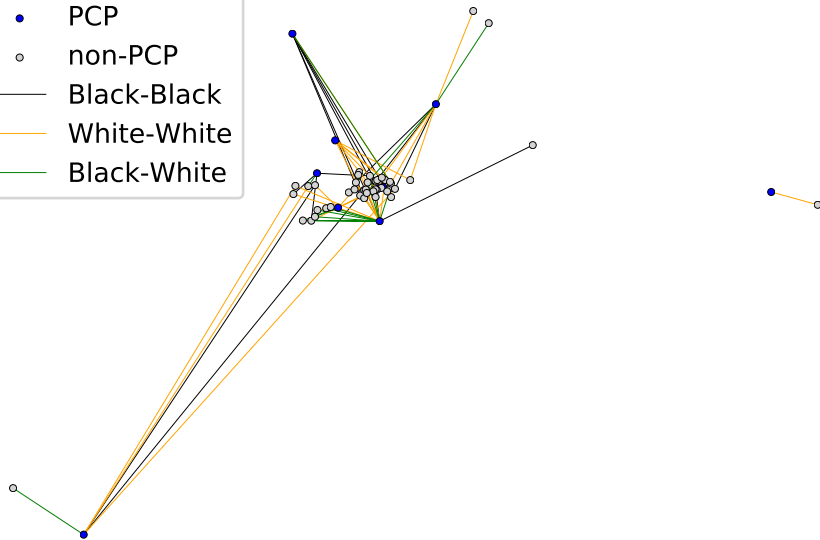



137

HRR: 8; Specialty: 2; Sample: 3

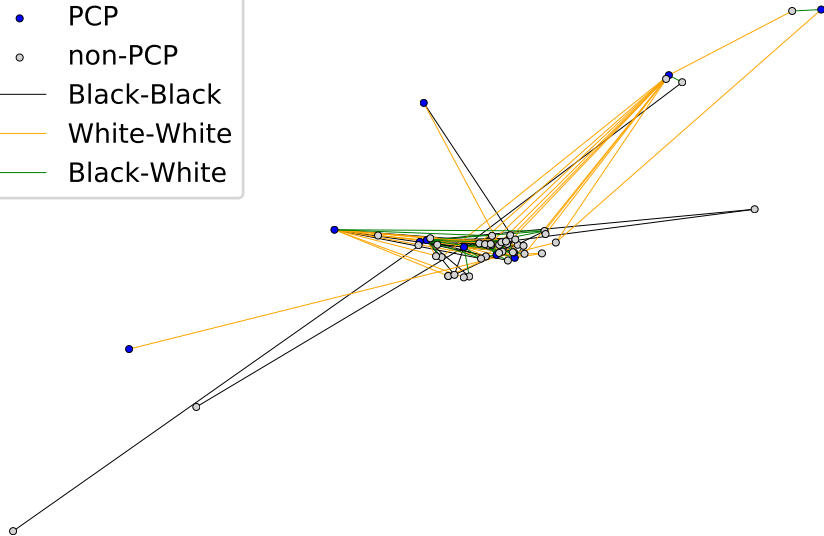

HRR: 8; Specialty: 3; Sample: 1

138

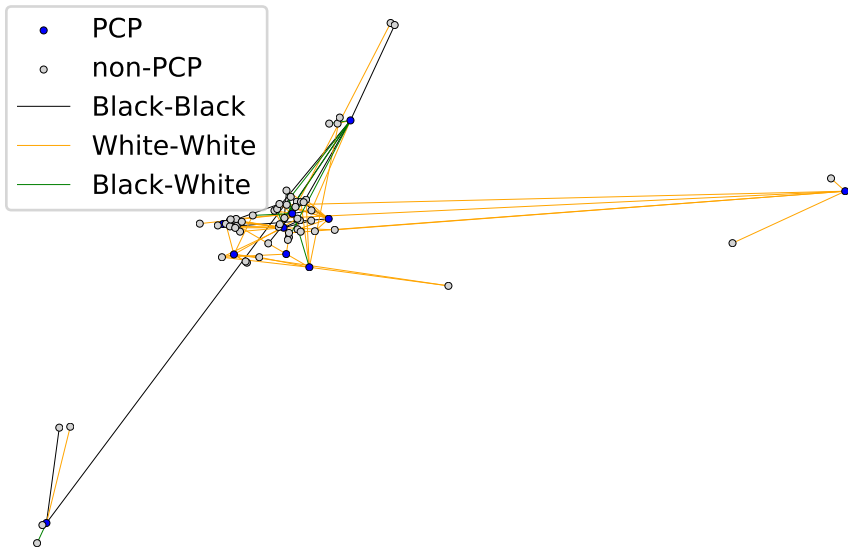

HRR: 8; Specialty: 3; Sample: 2

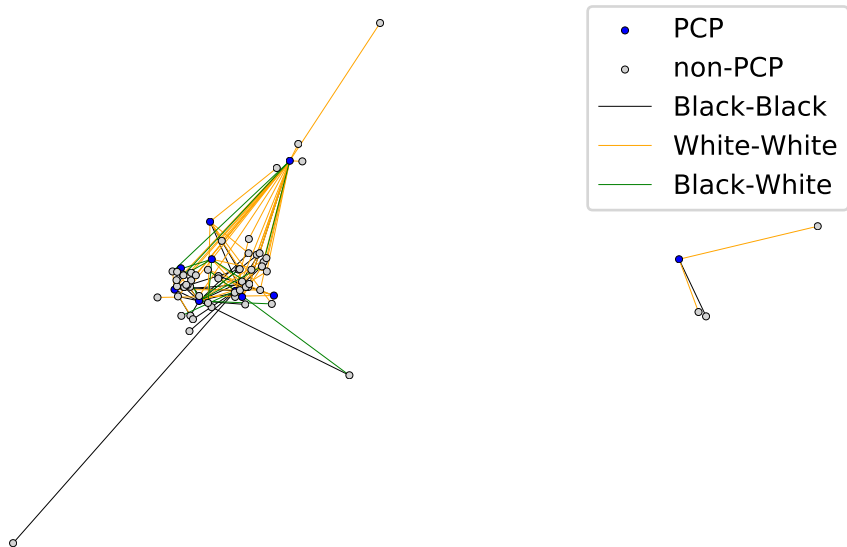

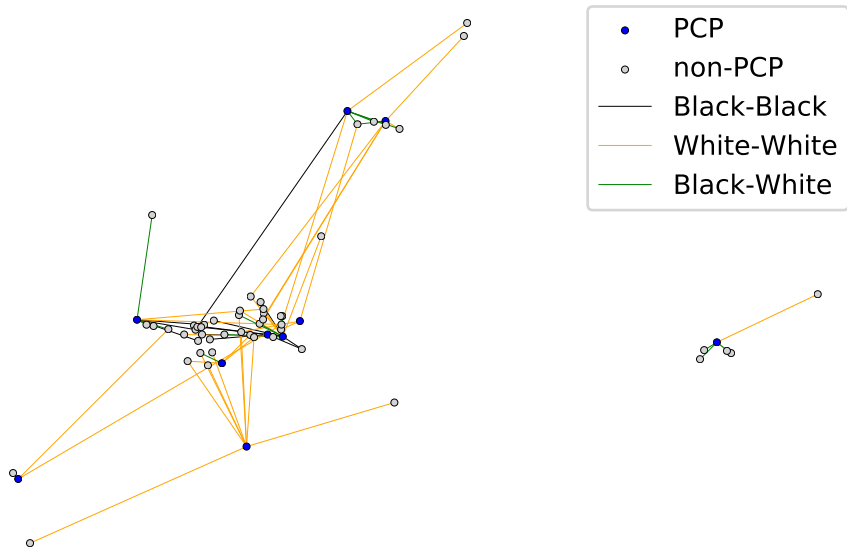

141

HRR: 8; Specialty: 4; Sample: 1

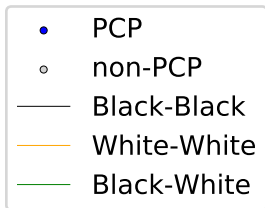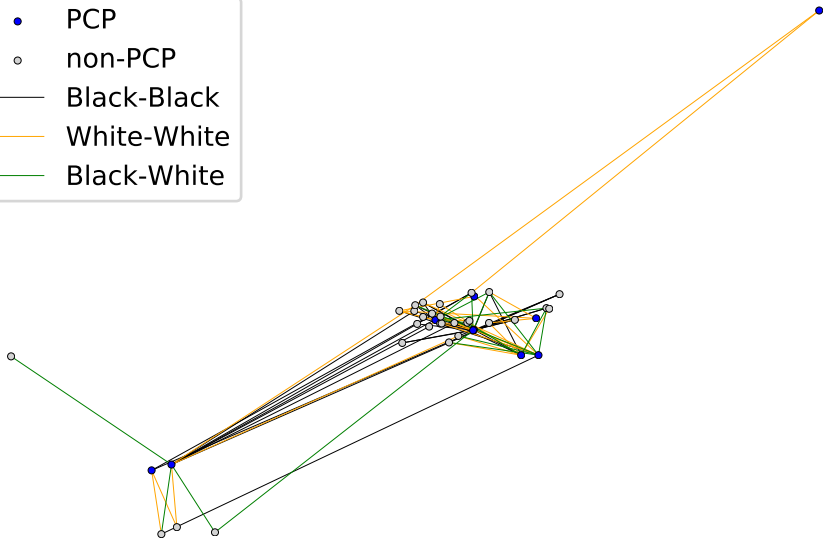

142

HRR: 8; Specialty: 4; Sample: 2

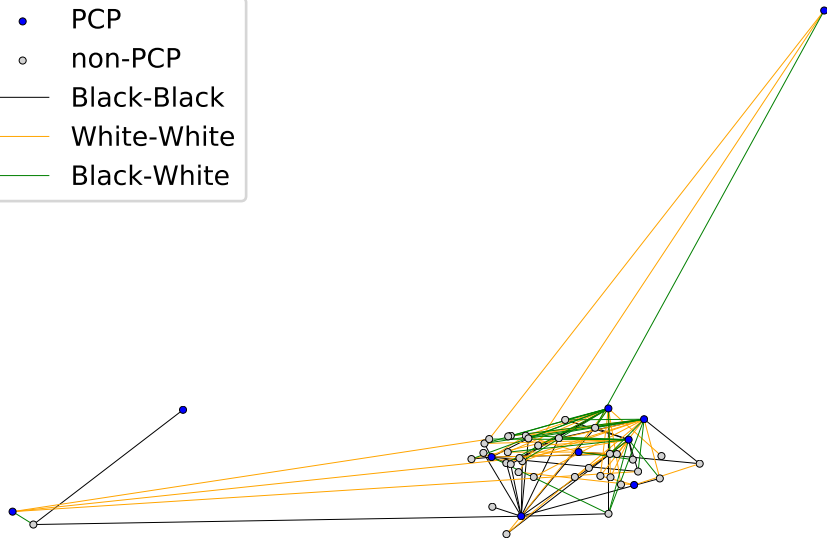

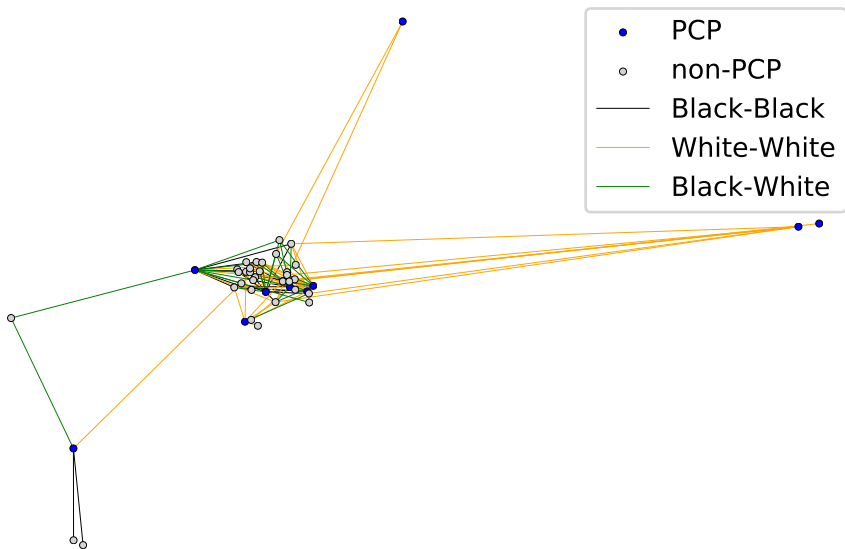

HRR: 8; Specialty: 5; Sample: 1

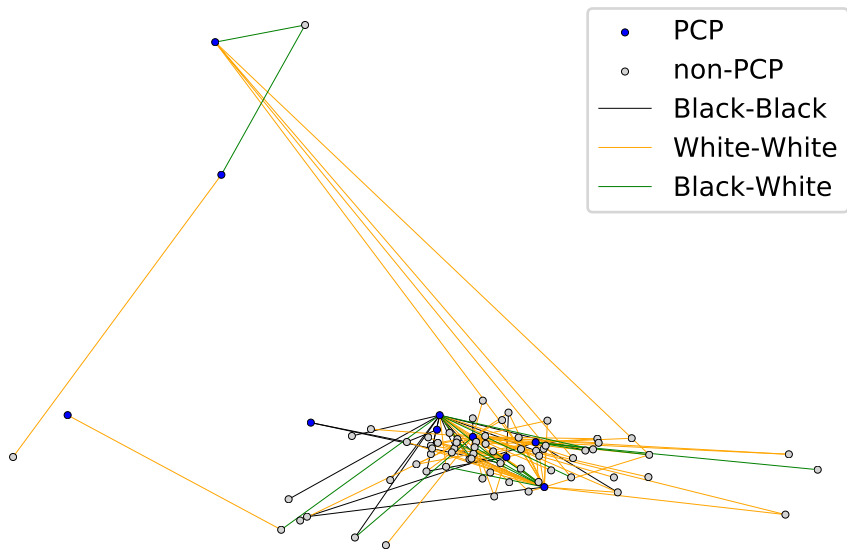



145

HRR: 8; Specialty: 5; Sample: 2

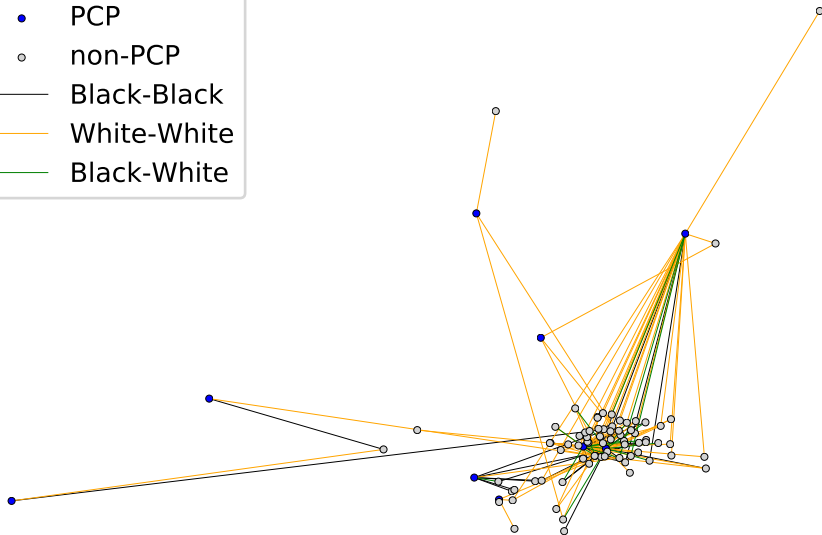

146

HRR: 8; Specialty: 5; Sample: 3

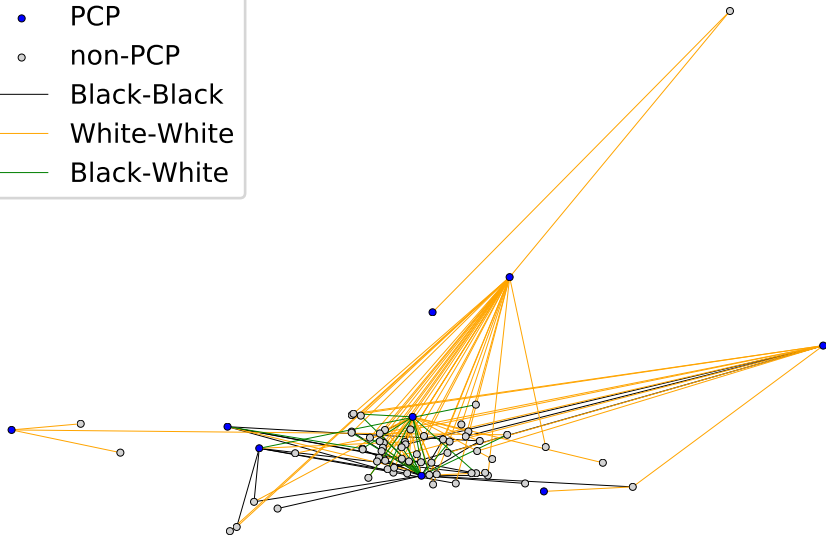

HRR: 8; Specialty: 6; Sample: 1

147

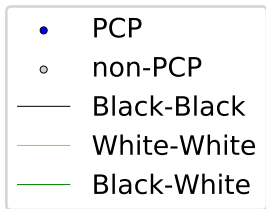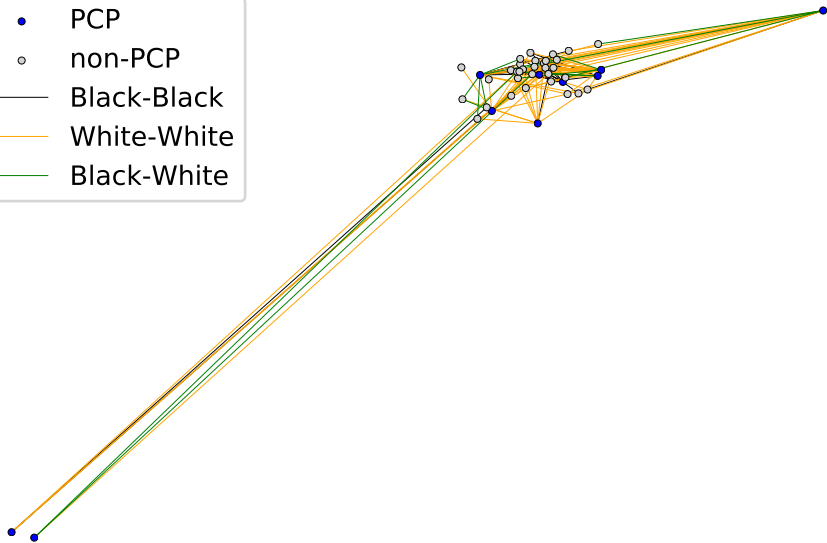

HRR: 8; Specialty: 6; Sample: 2

148

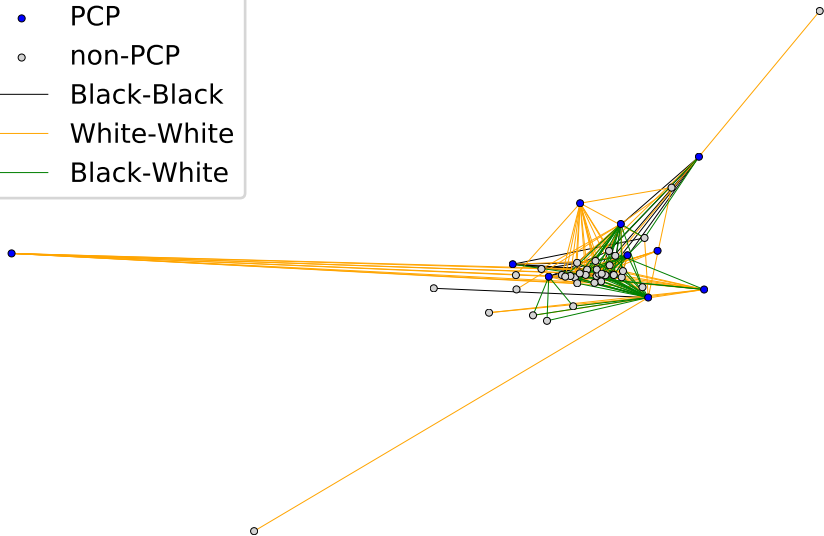

149

HRR: 8; Specialty: 6; Sample: 3

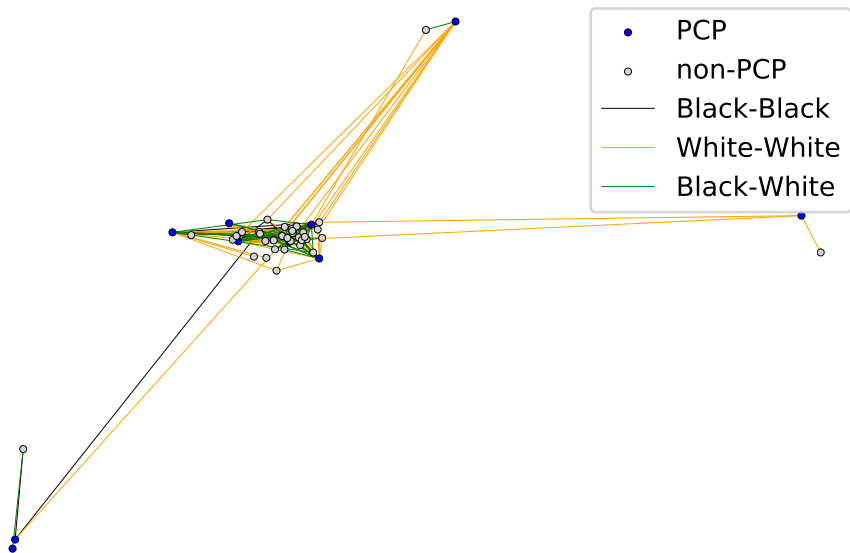

HRR: 9; Specialty: 1; Sample: 1

150

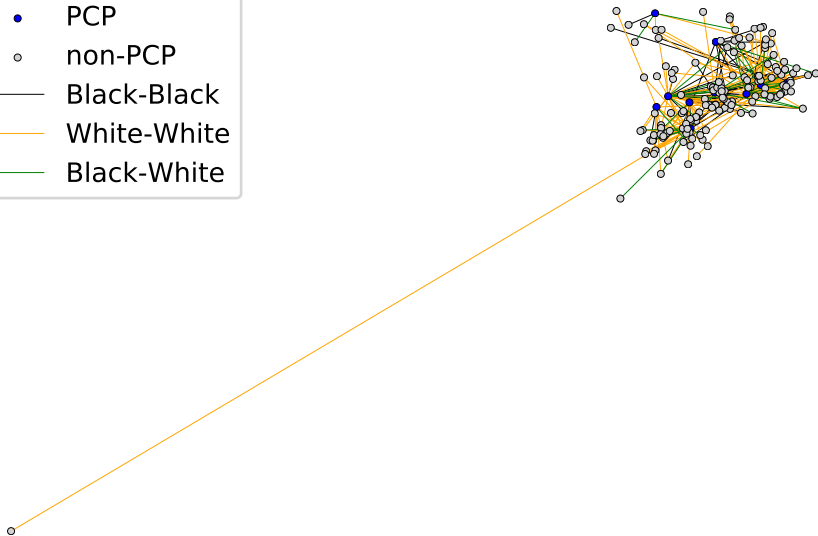

HRR: 9; Specialty: 1; Sample: 2

151

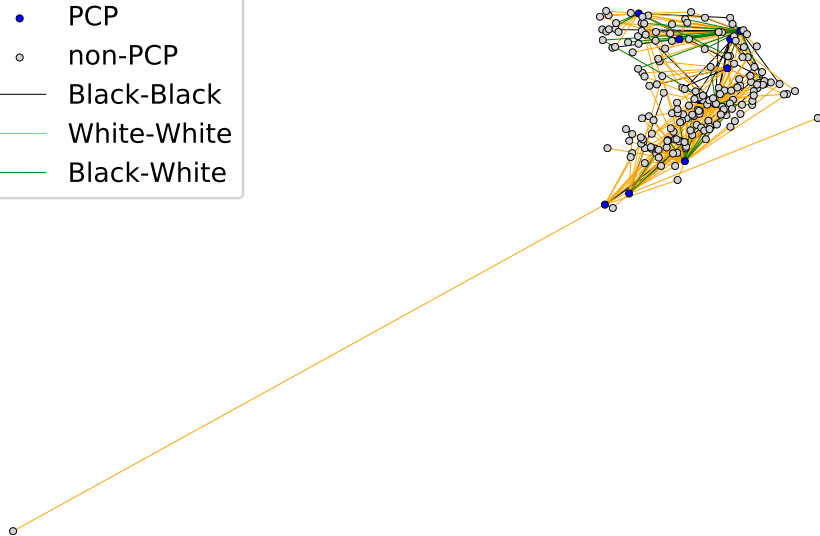

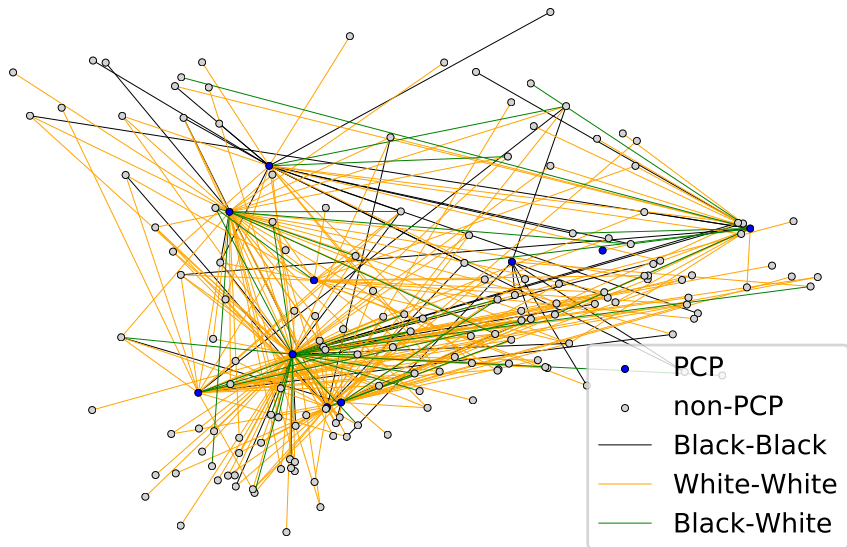



# HRR: 9; Specialty: 2; Sample: 1

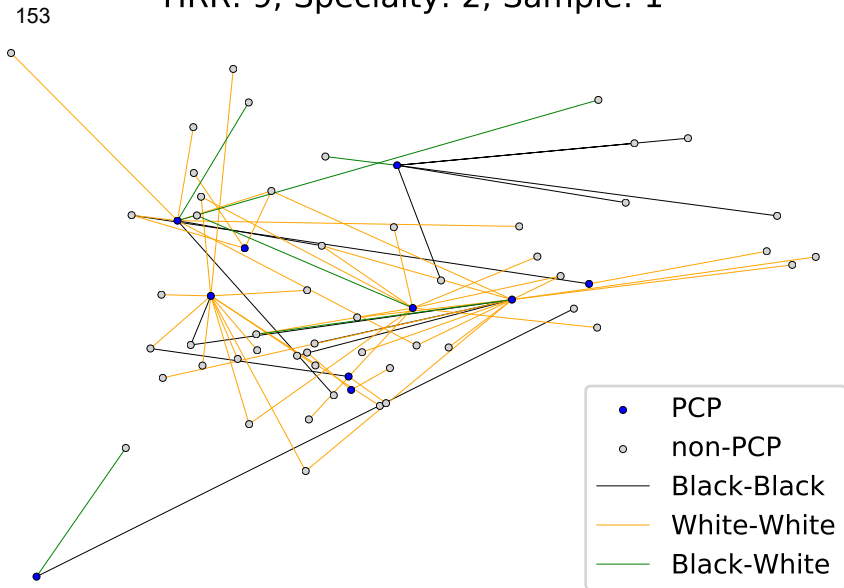

154

HRR: 9; Specialty: 2; Sample: 2

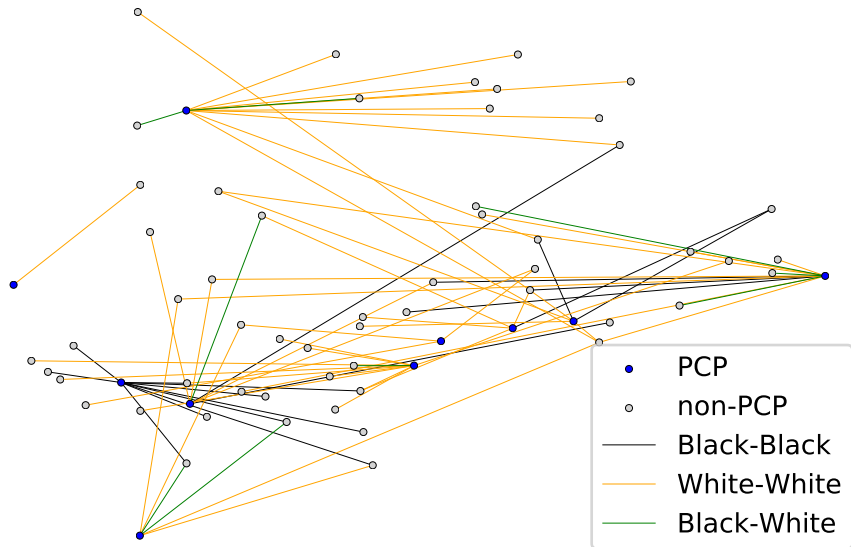

HRR: 9; Specialty: 2; Sample: 3

155

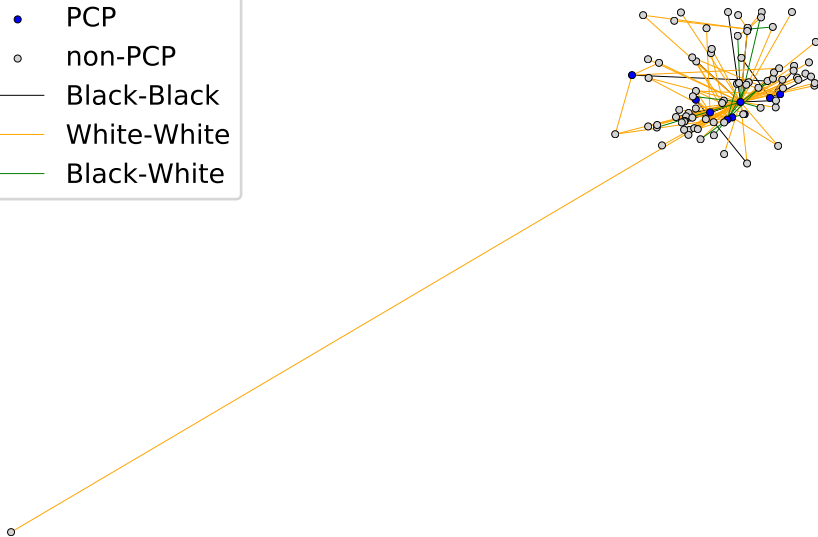

# HRR: 9; Specialty: 3; Sample: 1

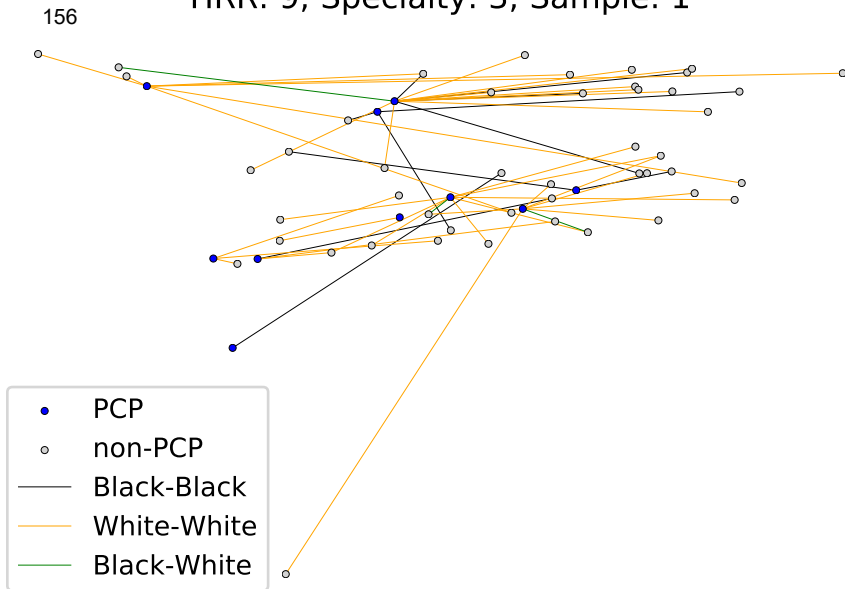

157

HRR: 9; Specialty: 3; Sample: 2

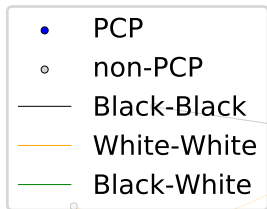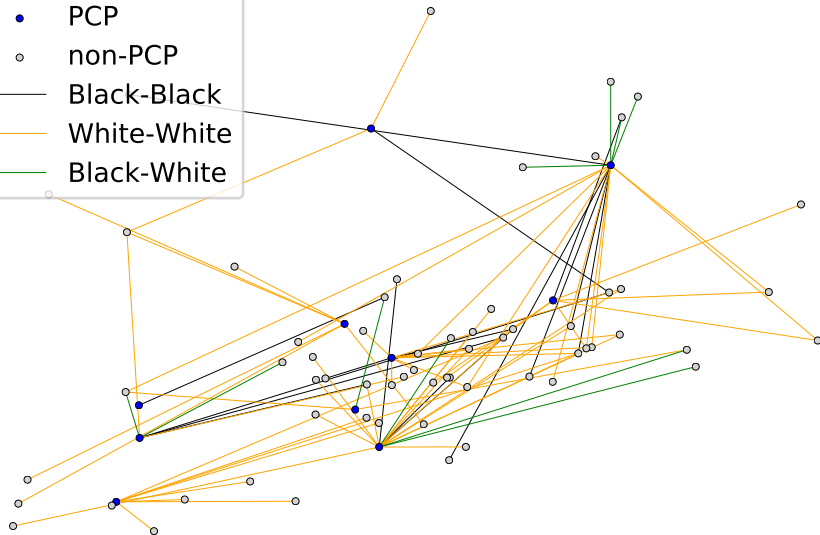

HRR: 9; Specialty: 3; Sample: 3

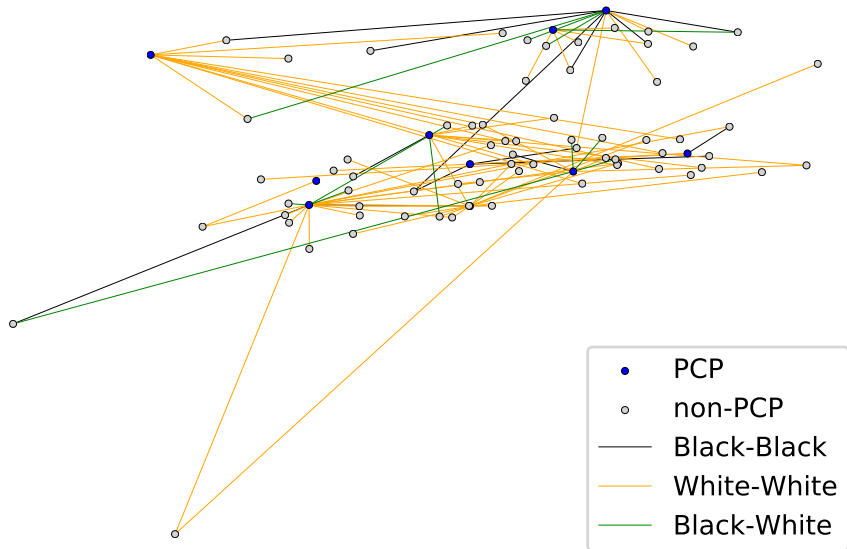

159

HRR: 9; Specialty: 4; Sample: 1

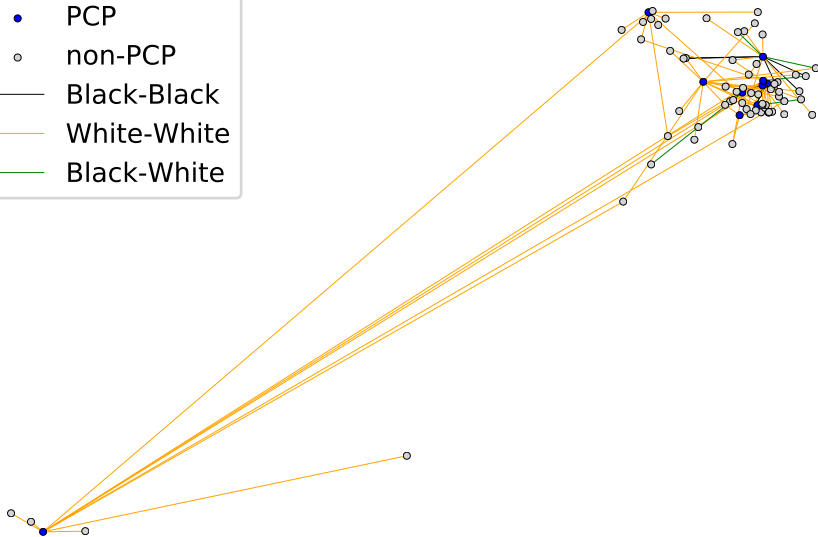

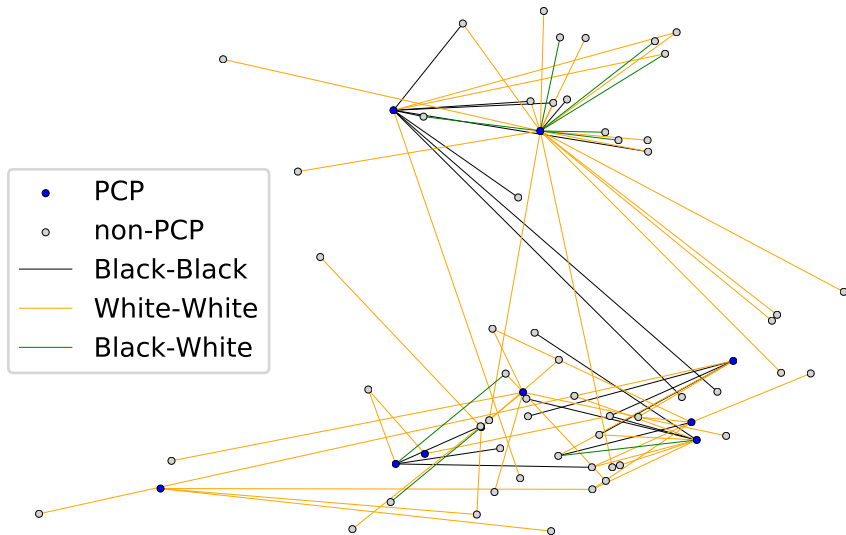



161

HRR: 9; Specialty: 4; Sample: 3

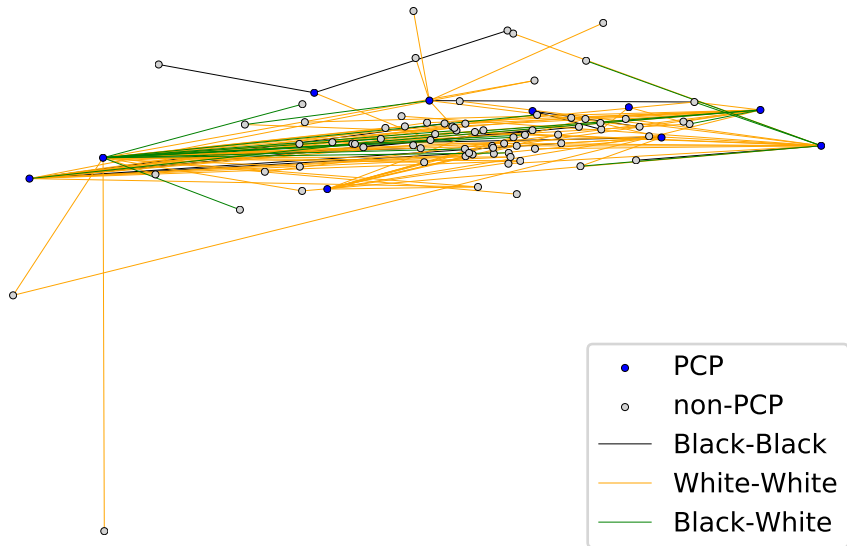

## HRR: 9; Specialty: 5; Sample: 1

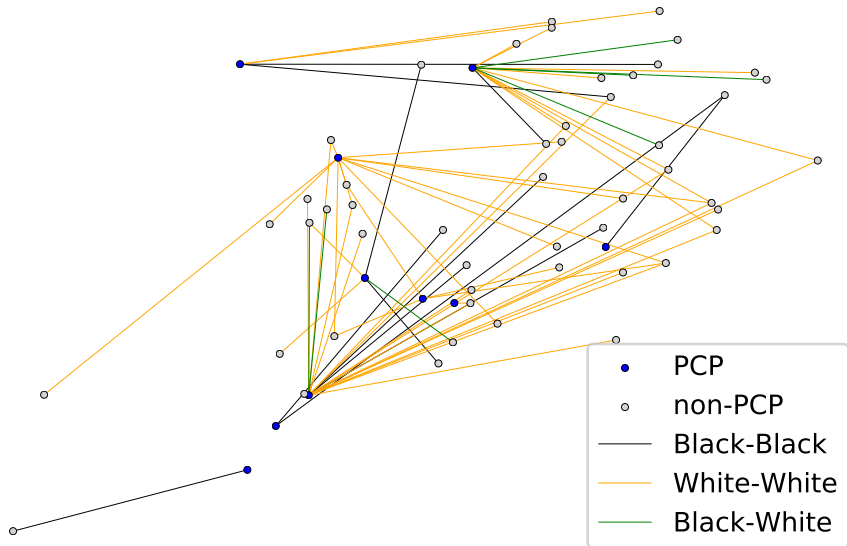

HRR: 9; Specialty: 5; Sample: 2

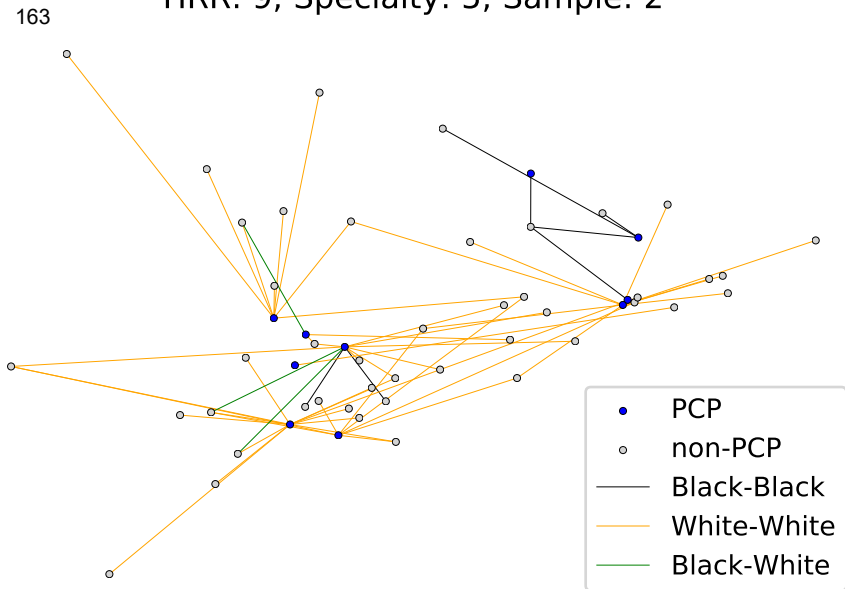

164

HRR: 9; Specialty: 5; Sample: 3

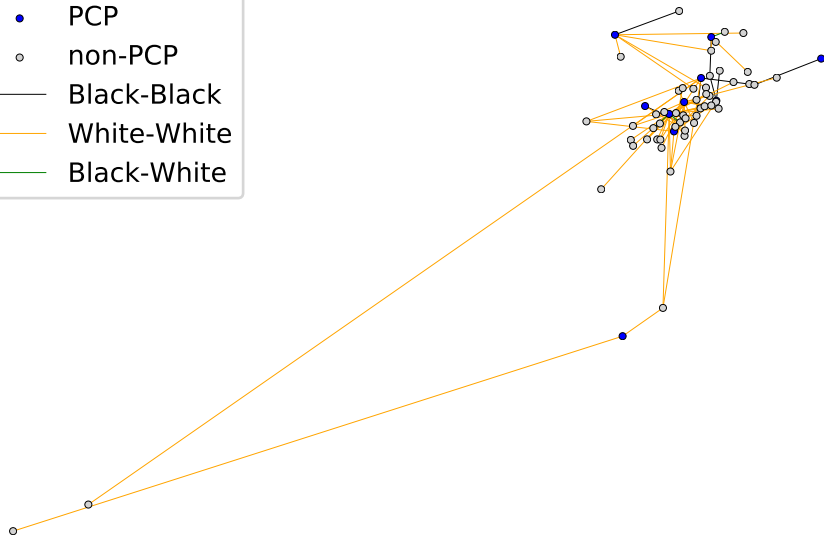

HRR: 9; Specialty: 6; Sample: 1

165

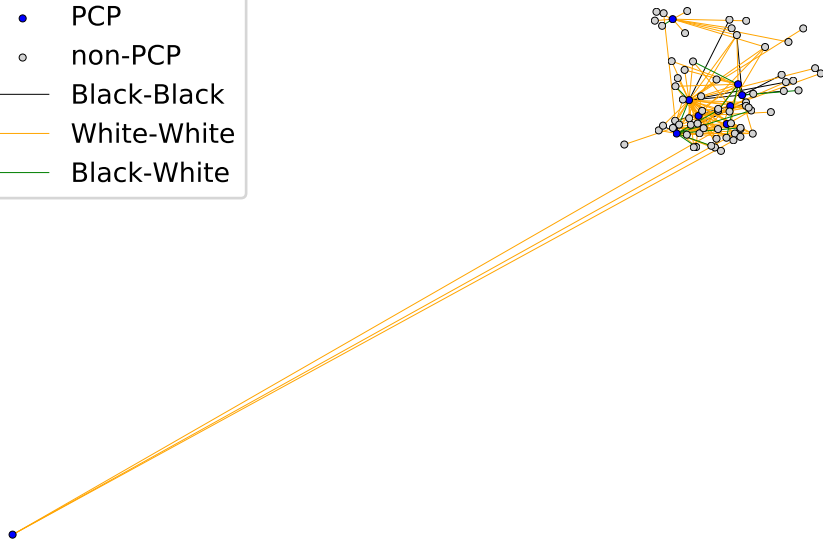

166

HRR: 9; Specialty: 6; Sample: 2

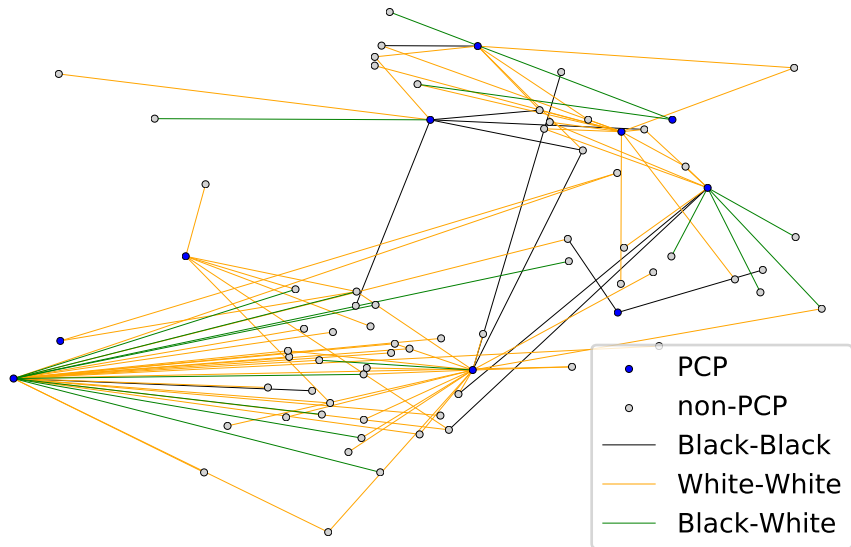

167

HRR: 9; Specialty: 6; Sample: 3

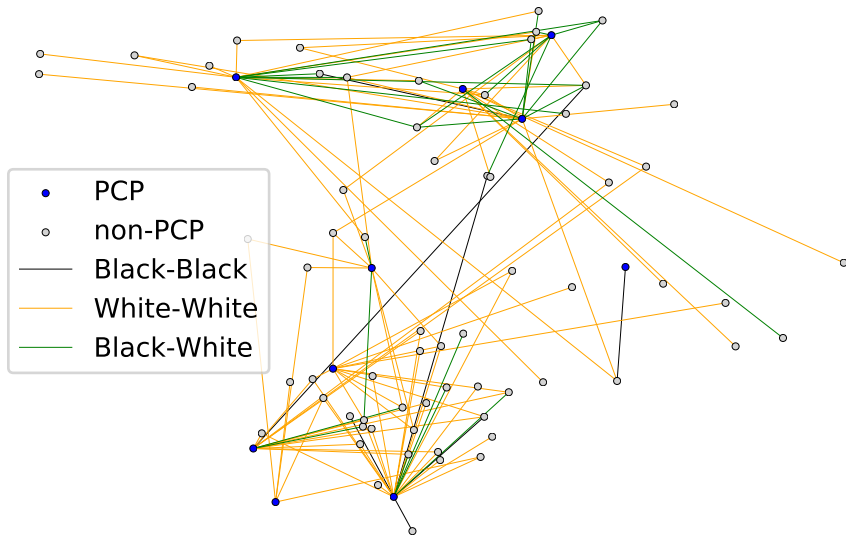

HRR: 10; Specialty: 1; Sample: 1

168

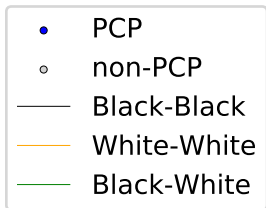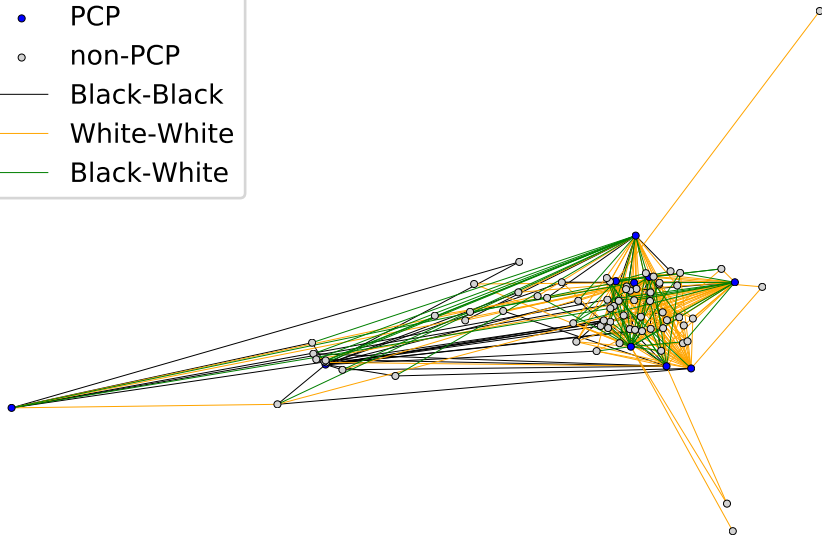



HRR: 10; Specialty: 1; Sample: 2

169

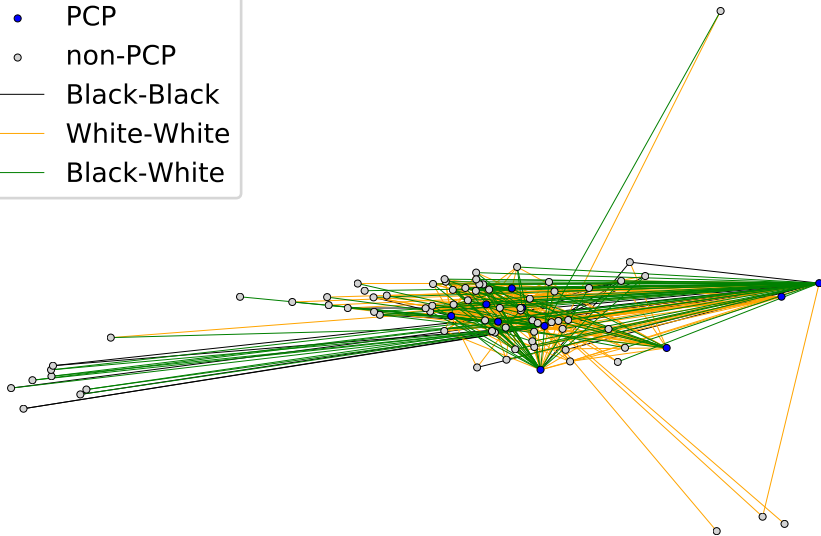

170

HRR: 10; Specialty: 1; Sample: 3

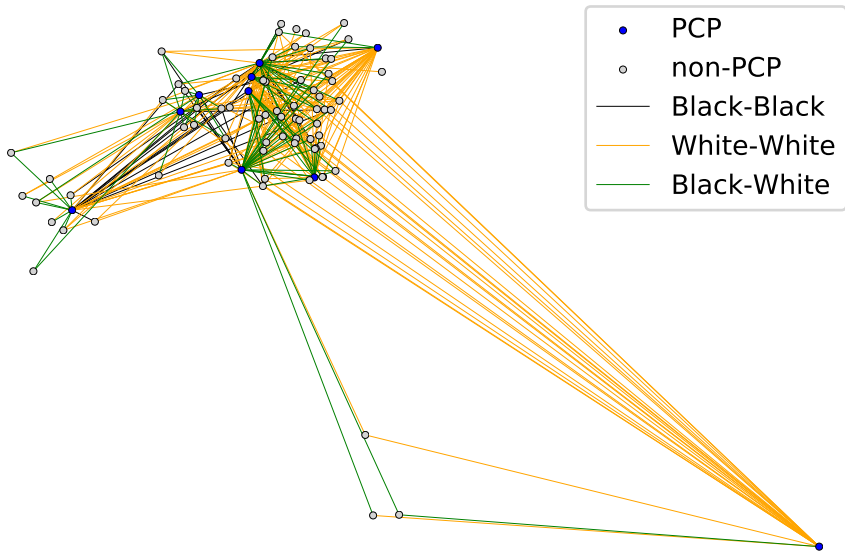

171

HRR: 10; Specialty: 2; Sample: 1

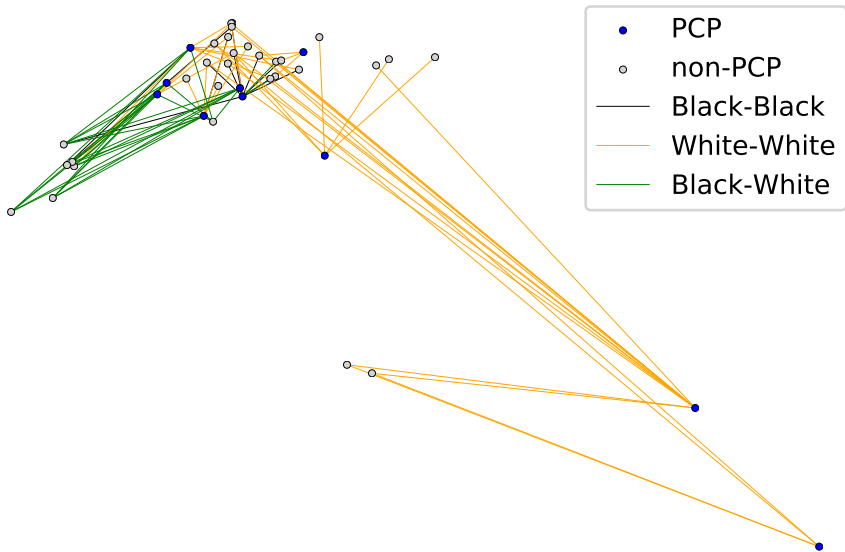

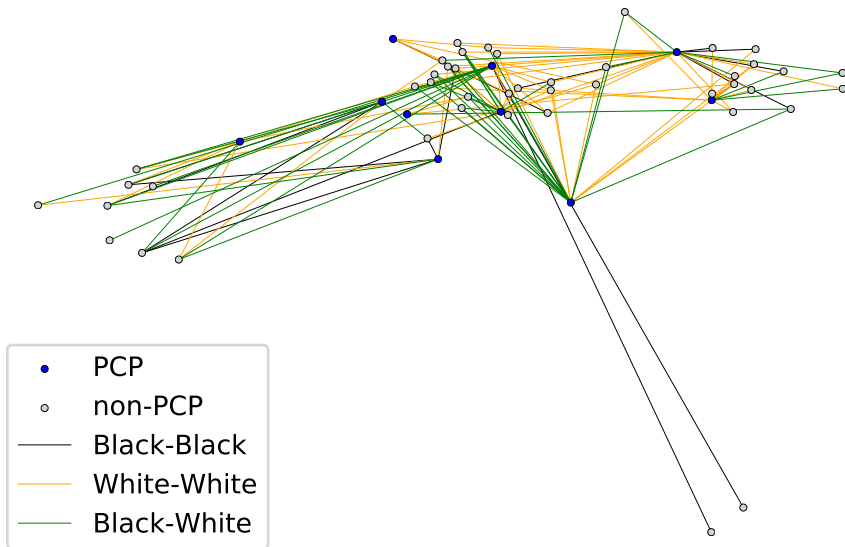

173

HRR: 10; Specialty: 2; Sample: 3

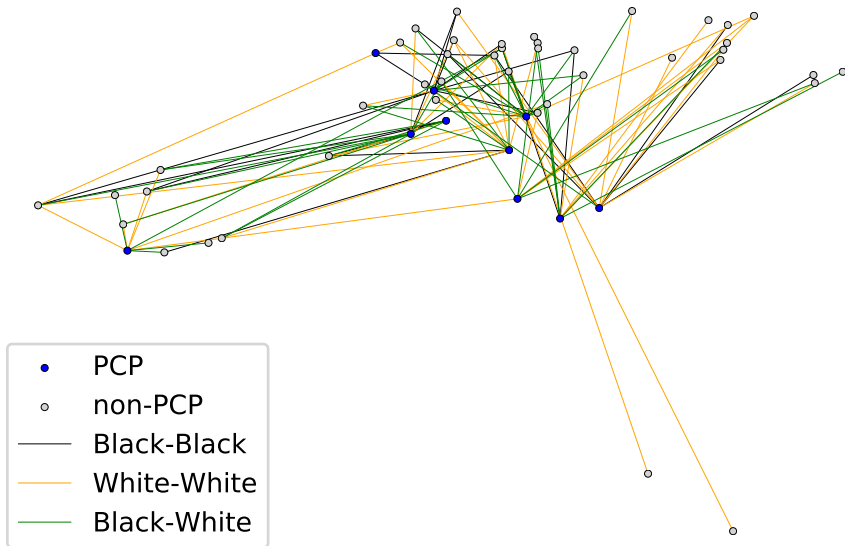

174

HRR: 10; Specialty: 3; Sample: 1

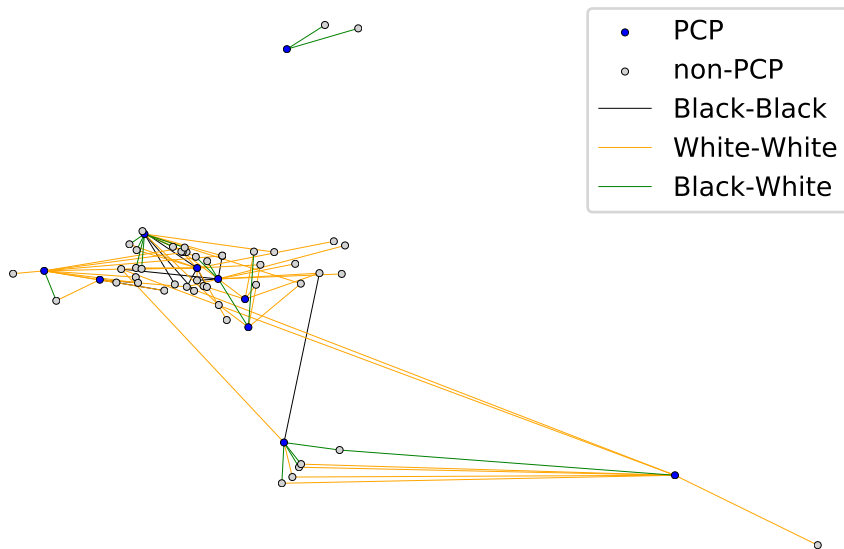

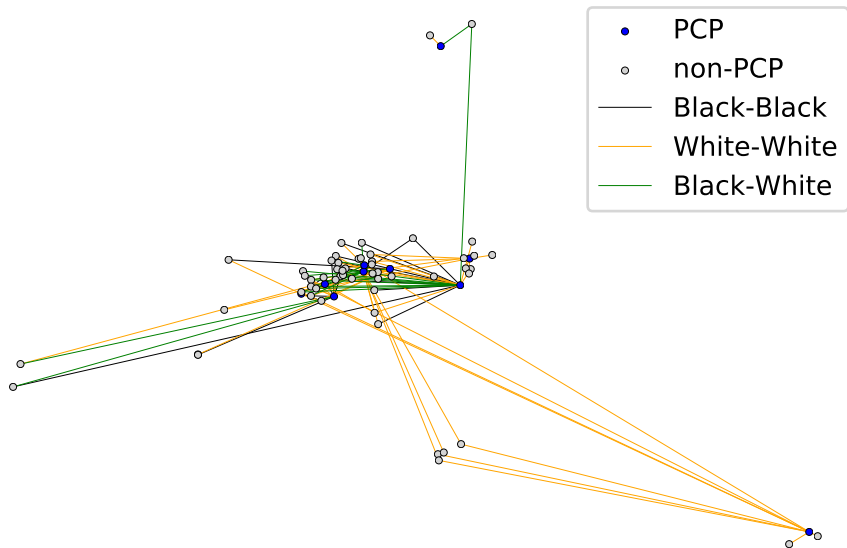

176

HRR: 10; Specialty: 3; Sample: 3

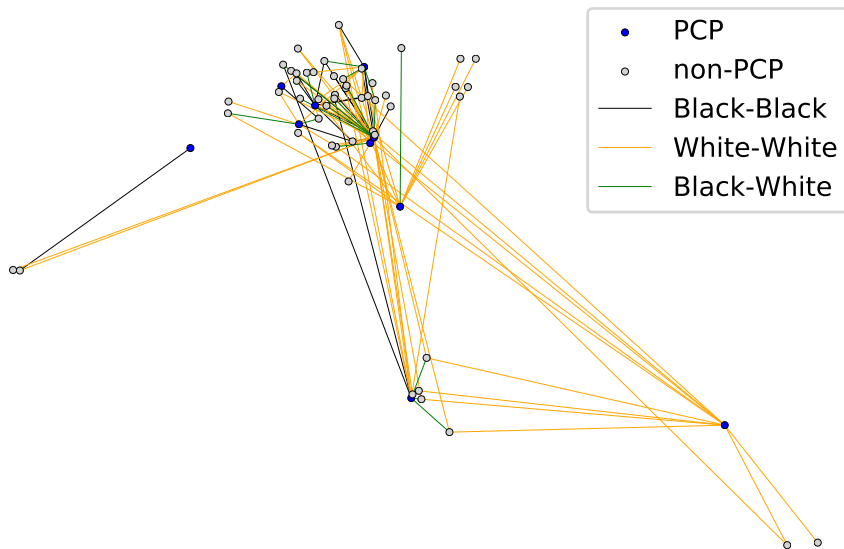



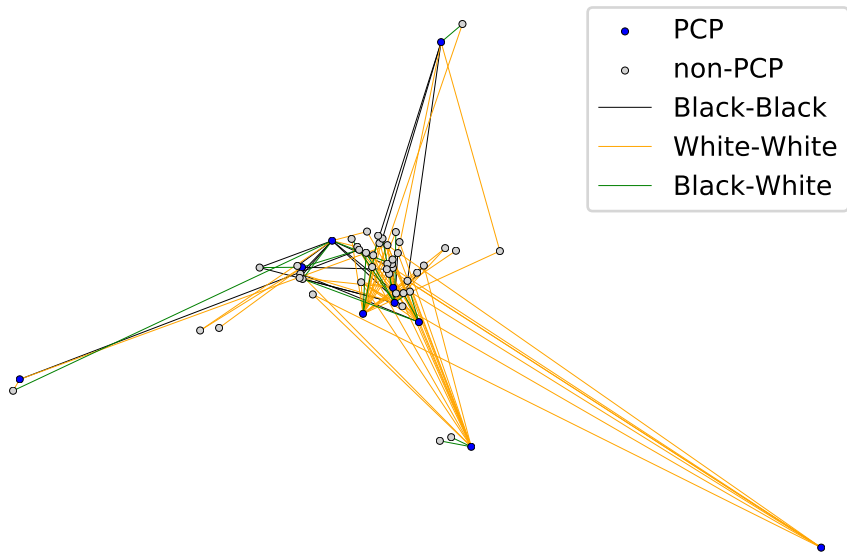

HRR: 10; Specialty: 4; Sample: 2

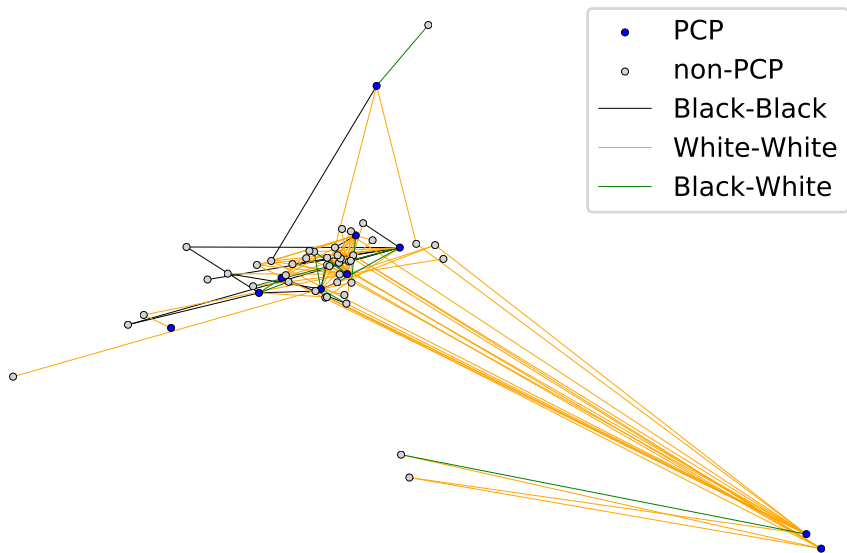

179

HRR: 10; Specialty: 4; Sample: 3

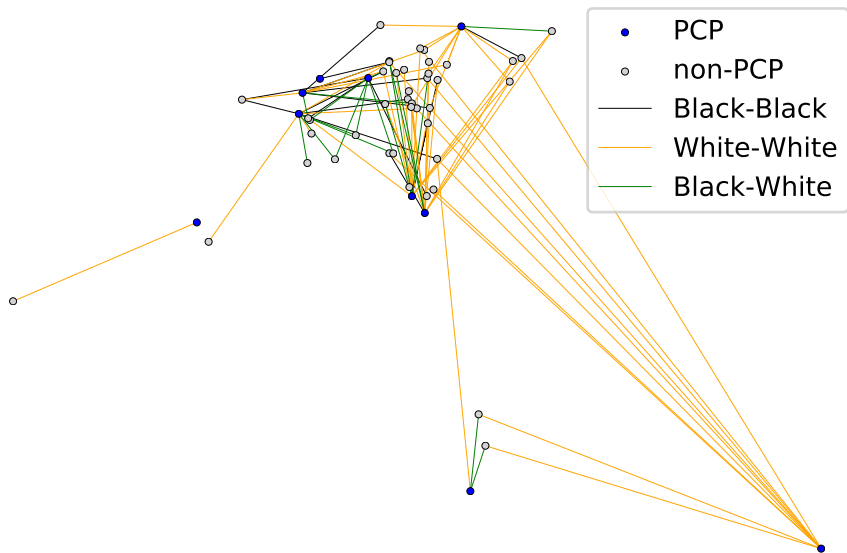

HRR: 10; Specialty: 5; Sample: 1

180

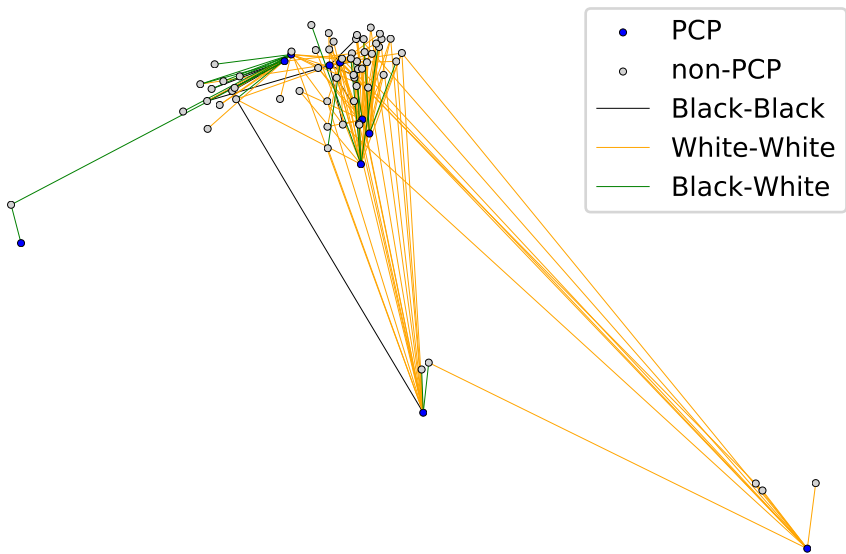

181

HRR: 10; Specialty: 5; Sample: 2

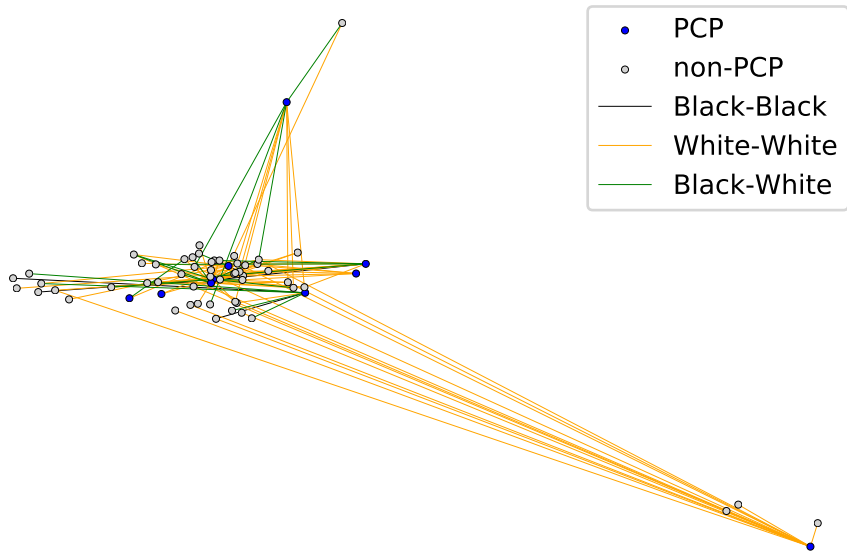

182

HRR: 10; Specialty: 5; Sample: 3

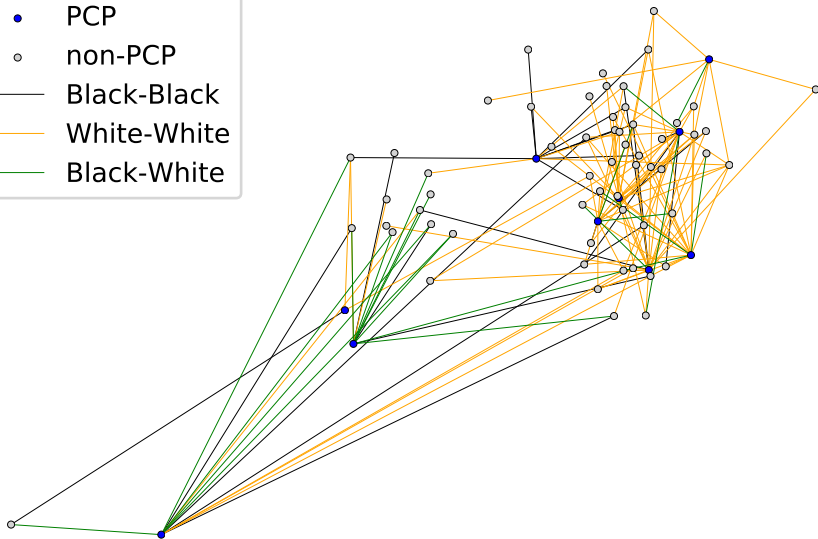

183

HRR: 10; Specialty: 6; Sample: 1

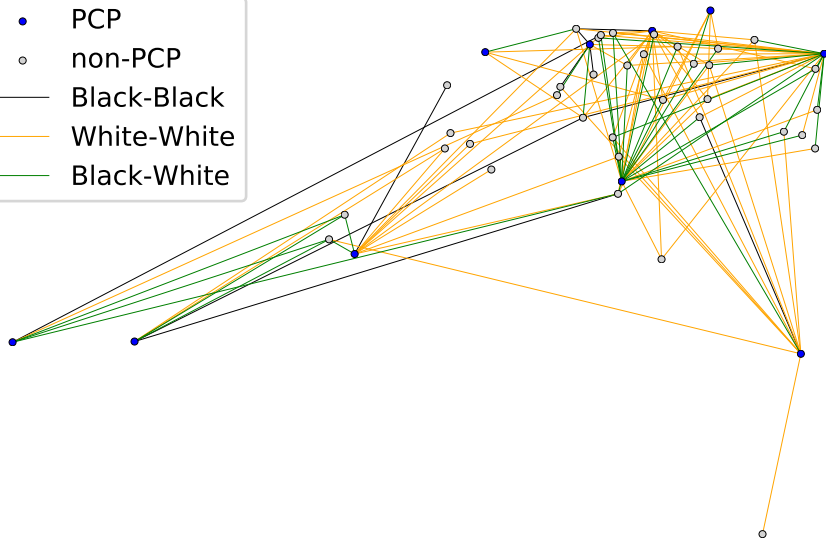

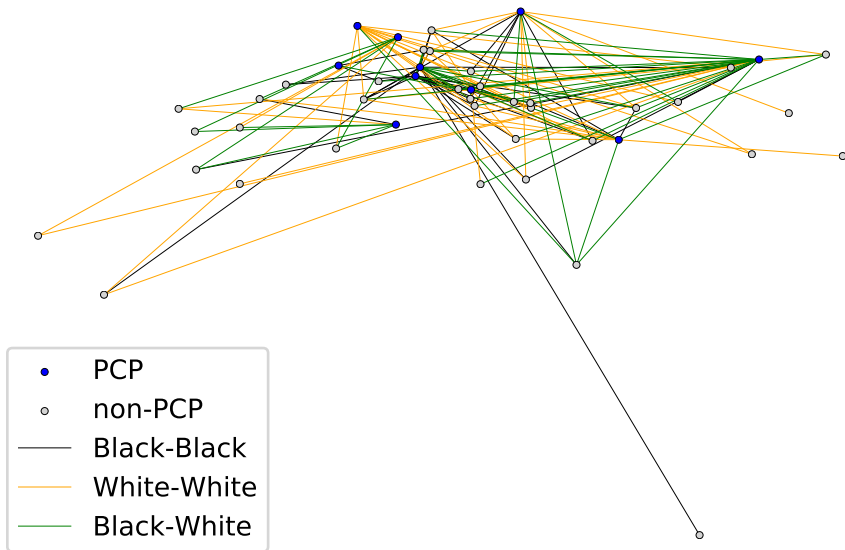



185

HRR: 10; Specialty: 6; Sample: 3

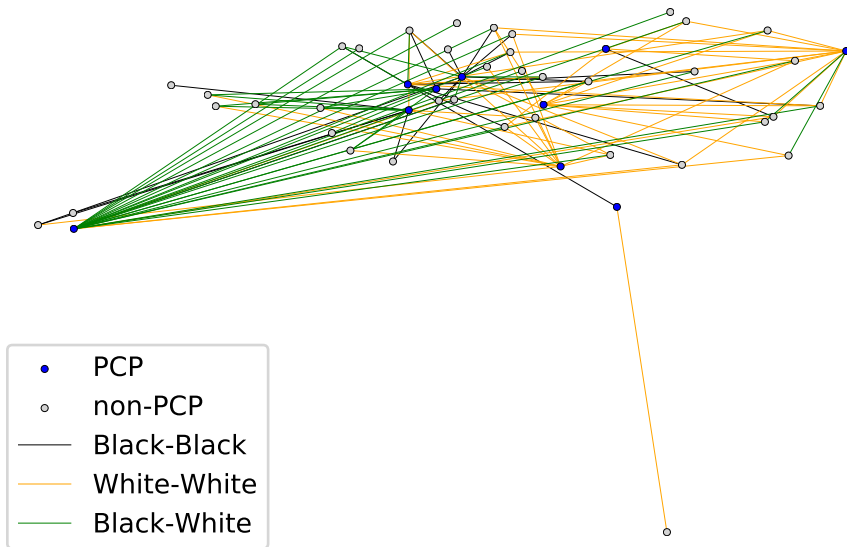

186

HRR: 11; Specialty: 1; Sample: 1

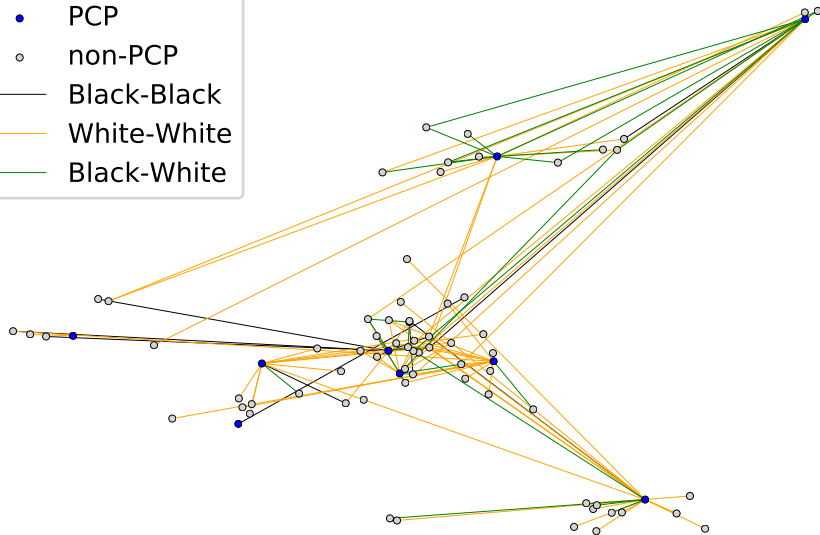

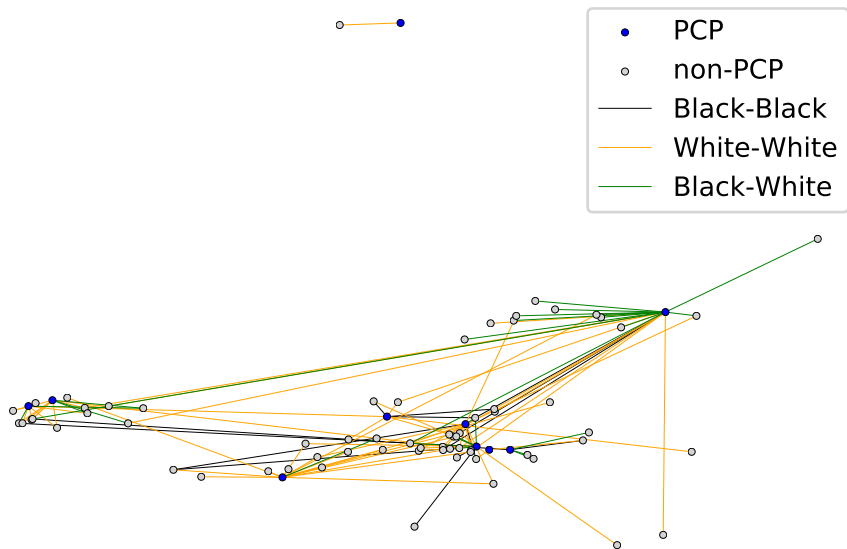

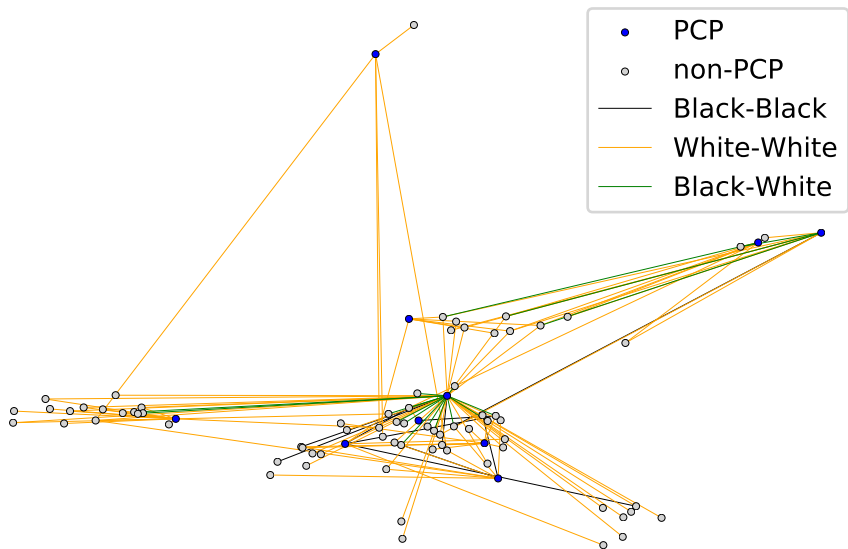

189

HRR: 11; Specialty: 2; Sample: 1

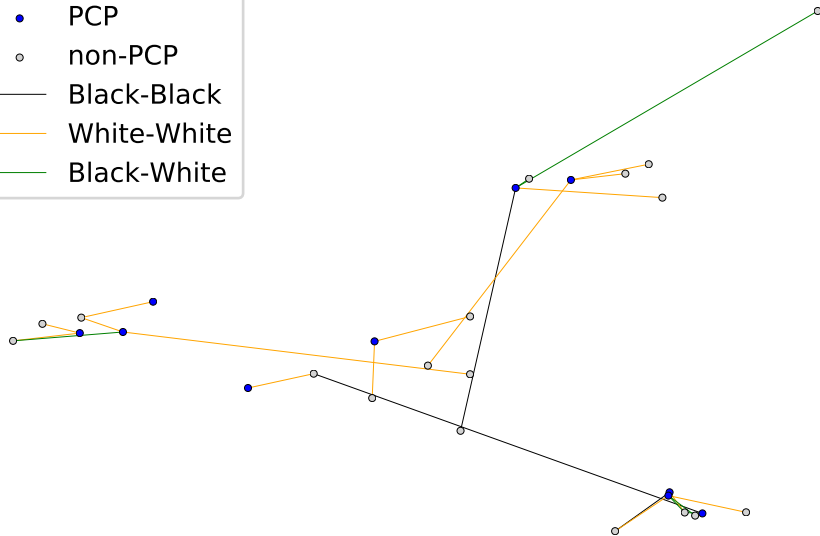

# HRR: 11; Specialty: 2; Sample: 2

190

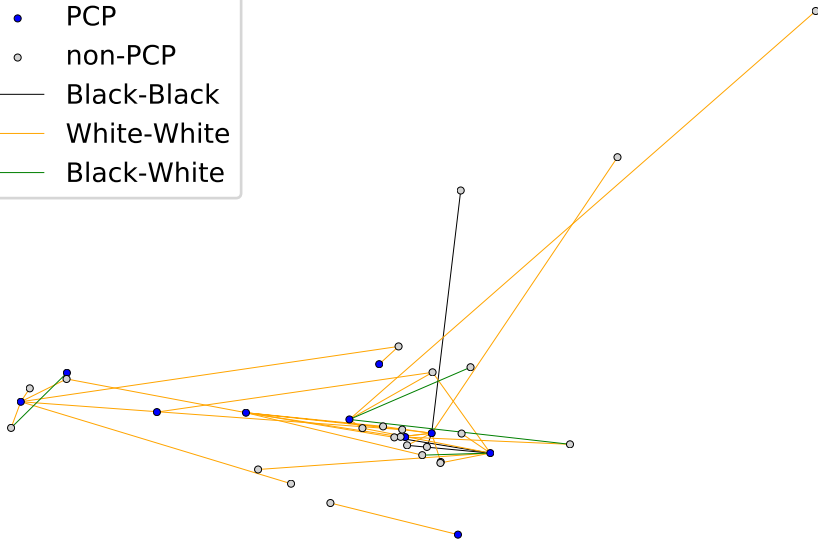

191

HRR: 11; Specialty: 2; Sample: 3

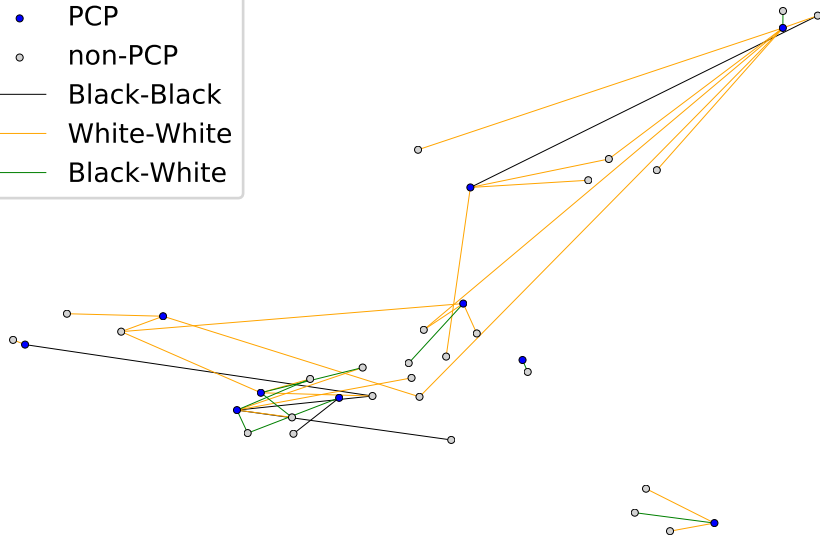





# HRR: 11; Specialty: 3; Sample: 2

193

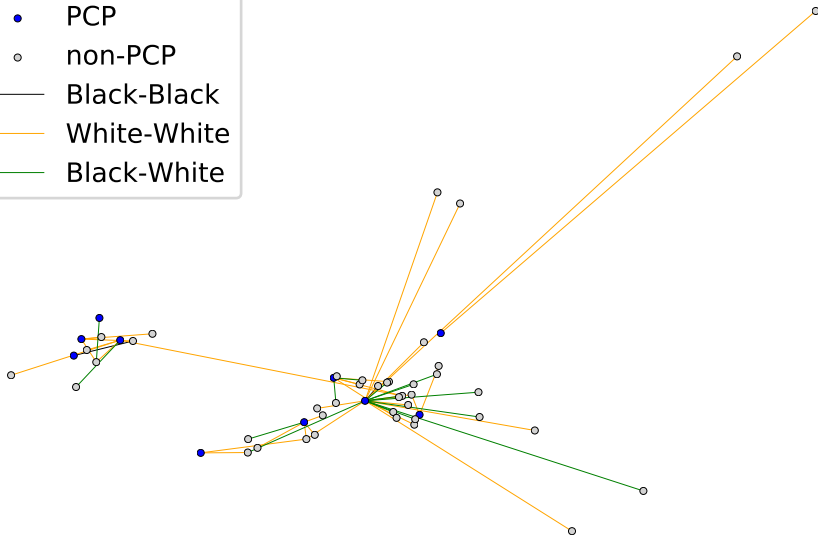

194

HRR: 11; Specialty: 3; Sample: 3

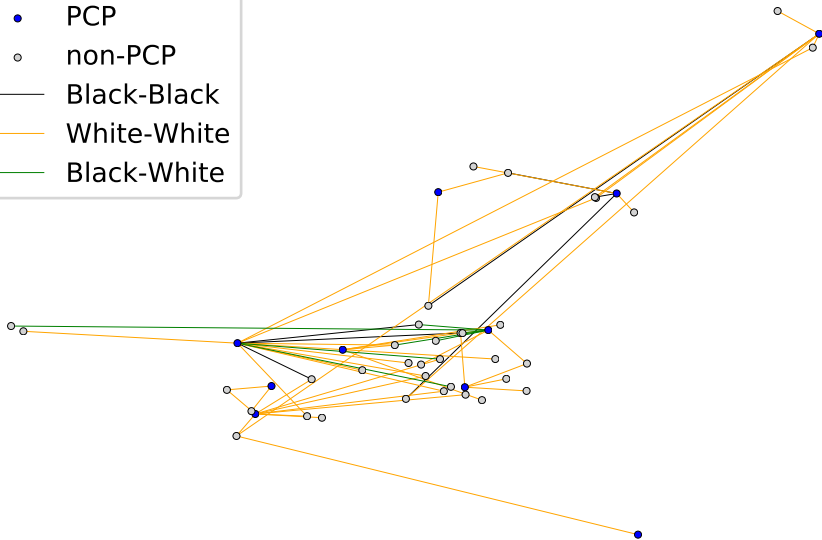

# HRR: 11; Specialty: 4; Sample: 1

195

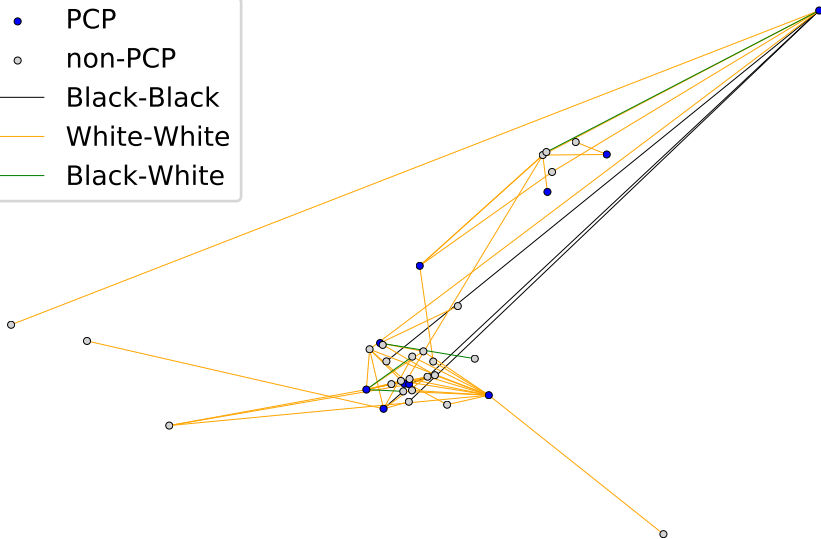

# HRR: 11; Specialty: 4; Sample: 2

196

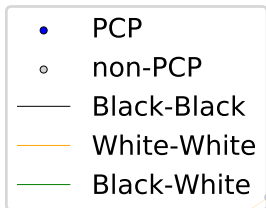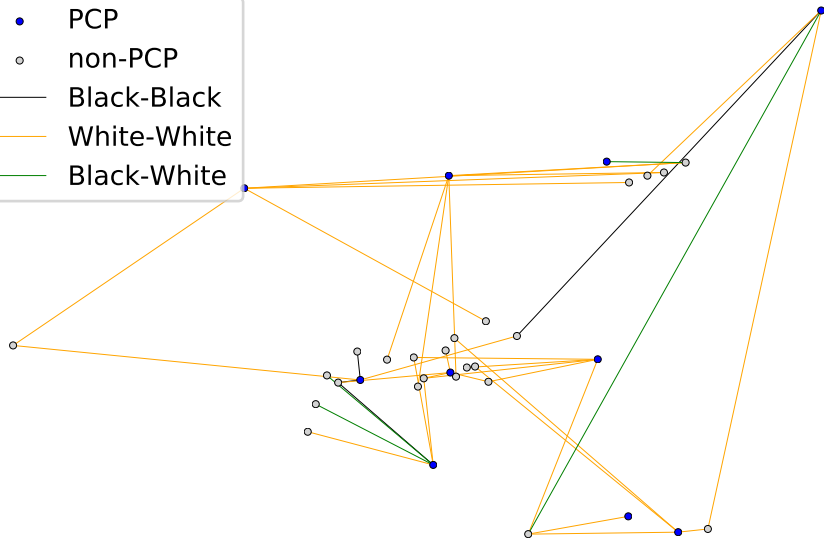

197

HRR: 11; Specialty: 4; Sample: 3

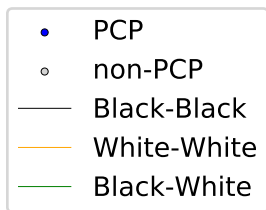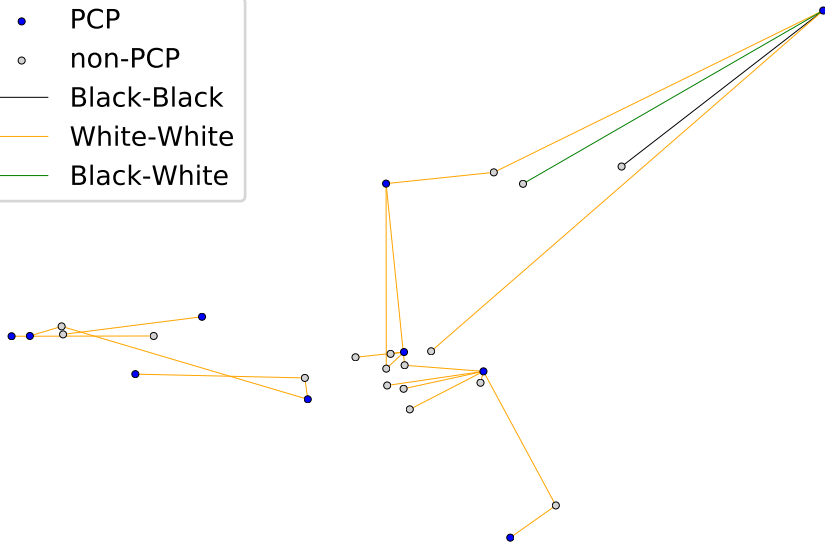

# HRR: 11; Specialty: 5; Sample: 1

198

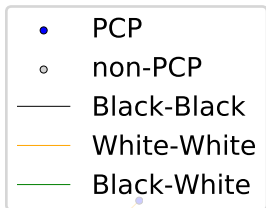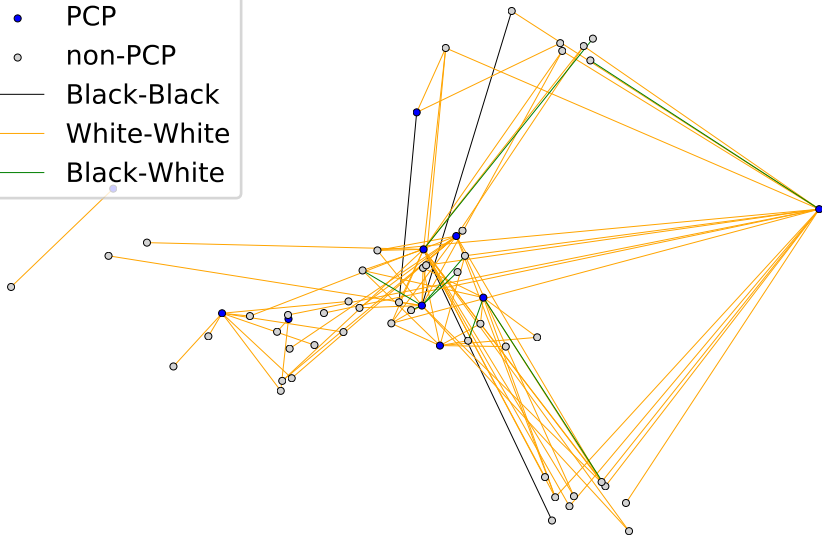

# HRR: 11; Specialty: 5; Sample: 2

199

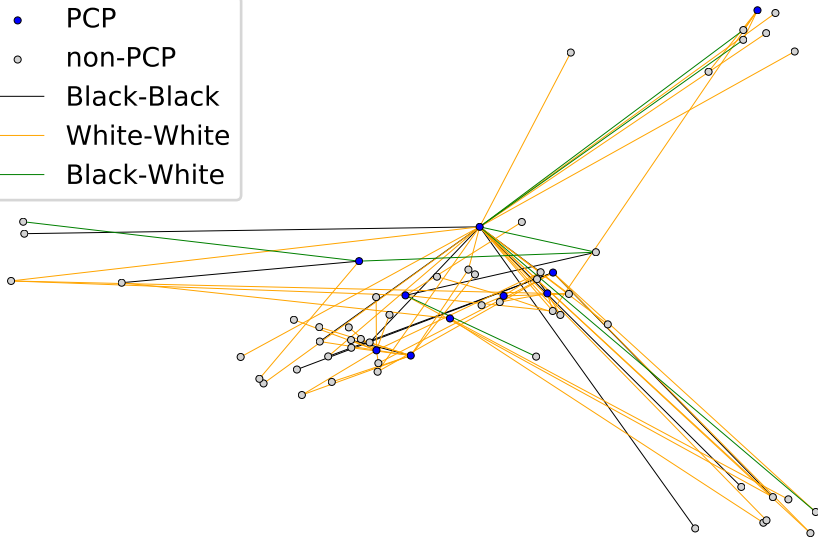

# HRR: 11; Specialty: 5; Sample: 3

200

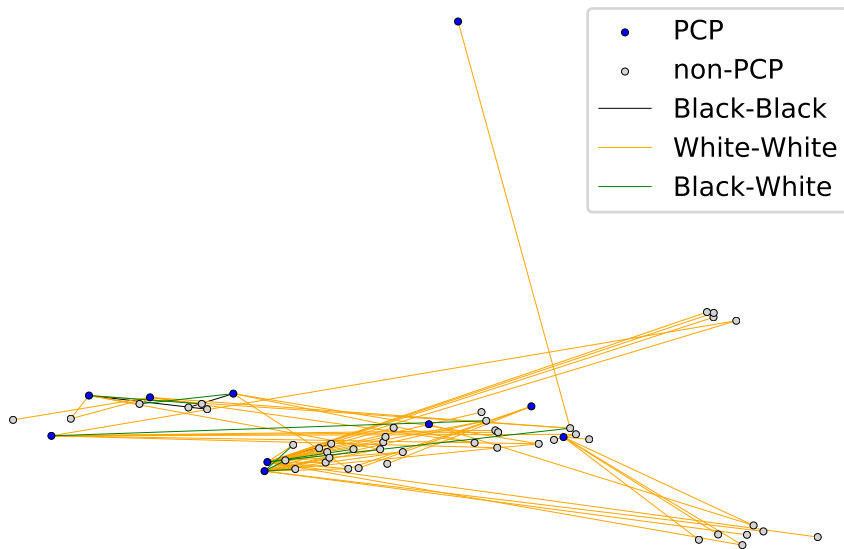



# HRR: 11; Specialty: 6; Sample: 1

201

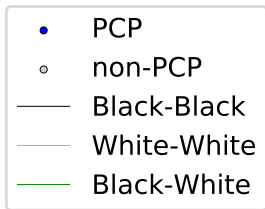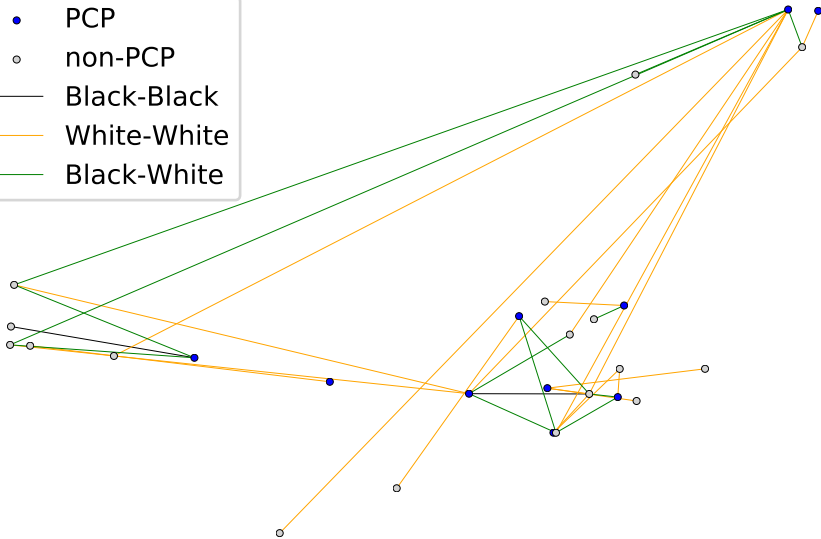

# HRR: 11; Specialty: 6; Sample: 2

202

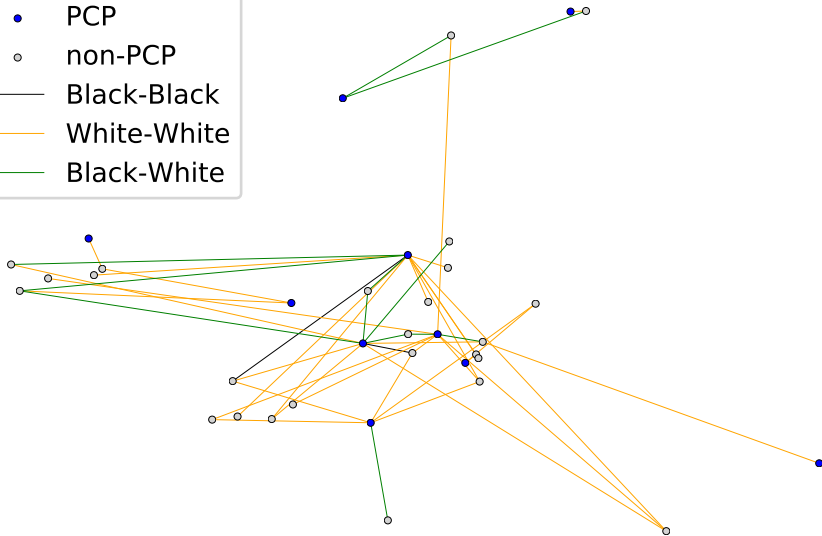

# HRR: 11; Specialty: 6; Sample: 3

203

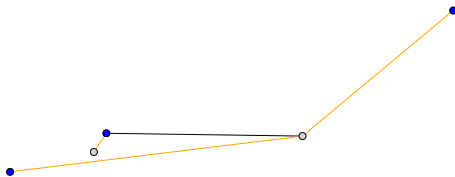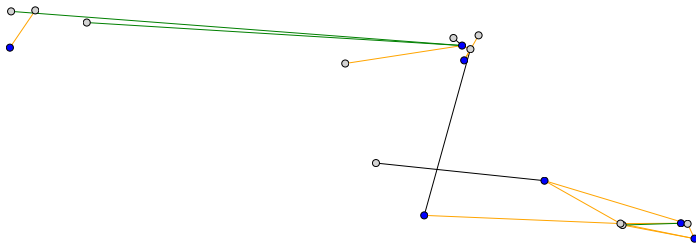

204

HRR: 12; Specialty: 1; Sample: 1

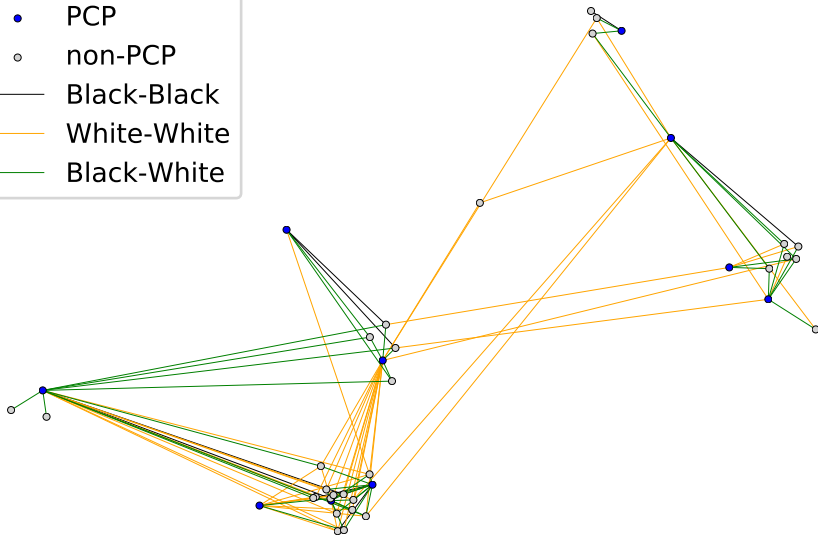

HRR: 12; Specialty: 1; Sample: 2

205

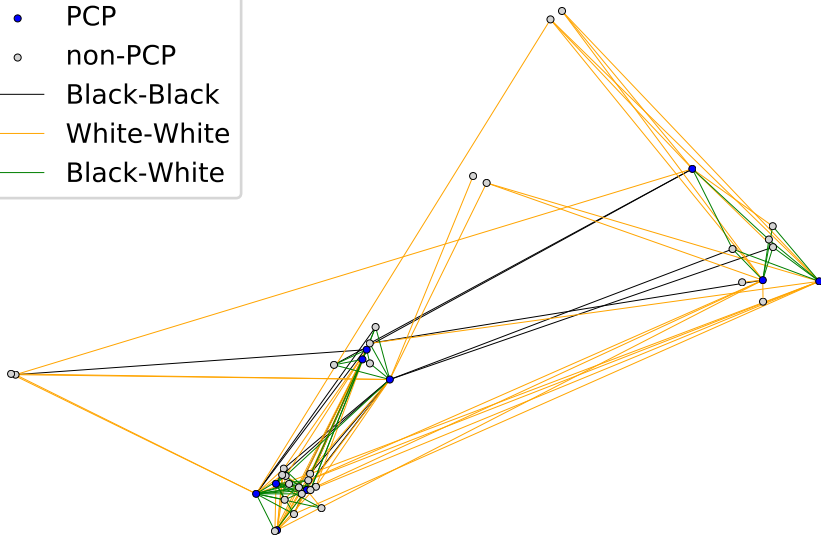

206

HRR: 12; Specialty: 1; Sample: 3

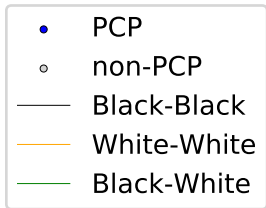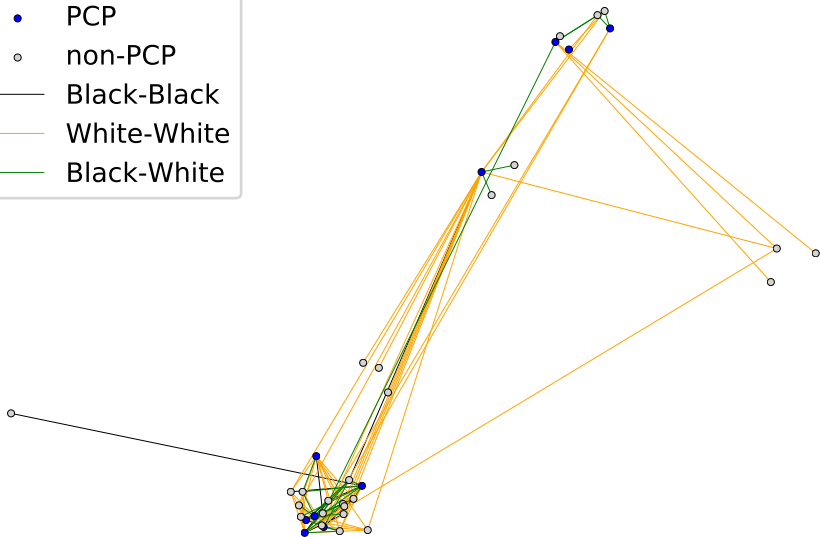

207

HRR: 12; Specialty: 2; Sample: 1

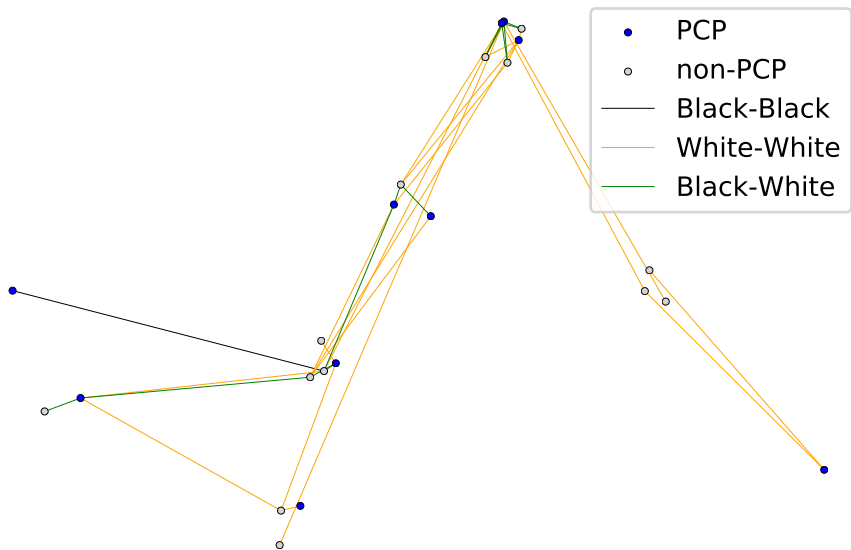

HRR: 12; Specialty: 2; Sample: 2

208

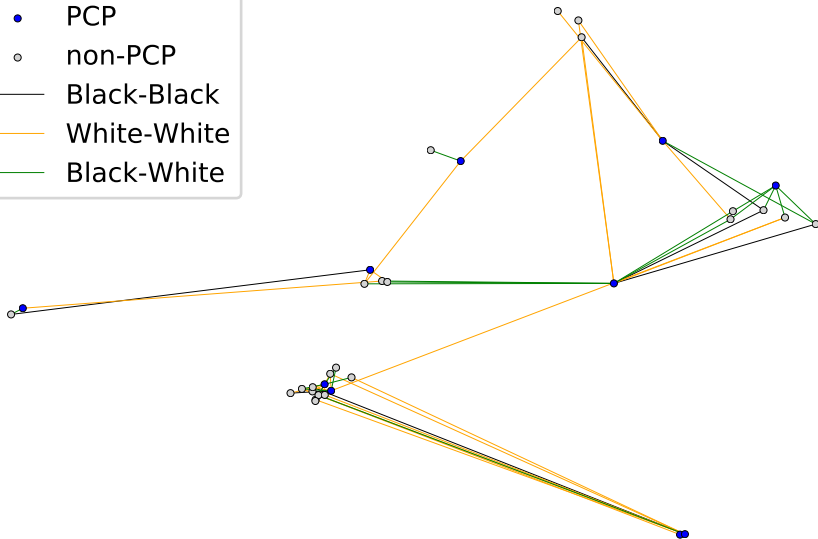



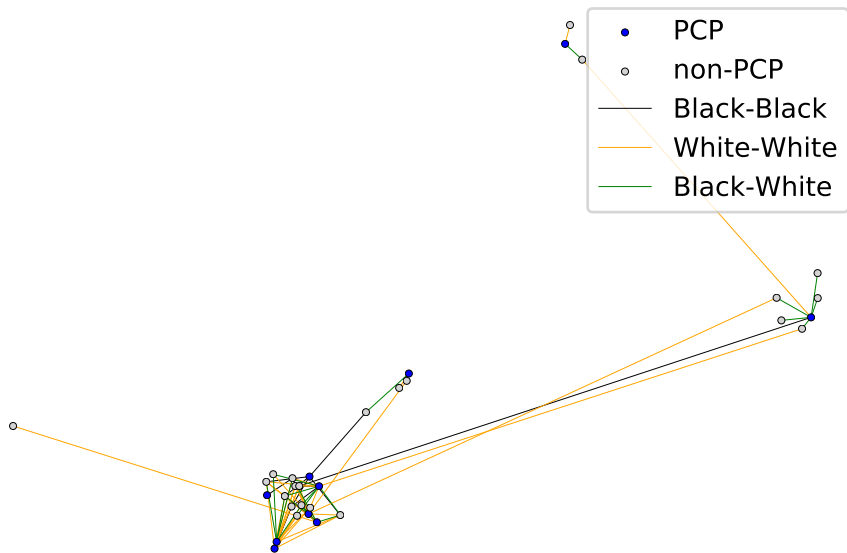

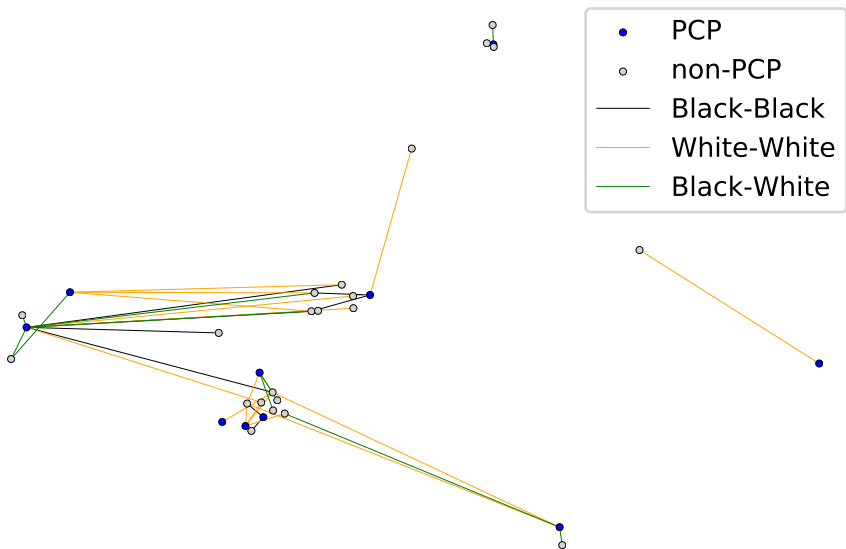

211

HRR: 12; Specialty: 3; Sample: 2

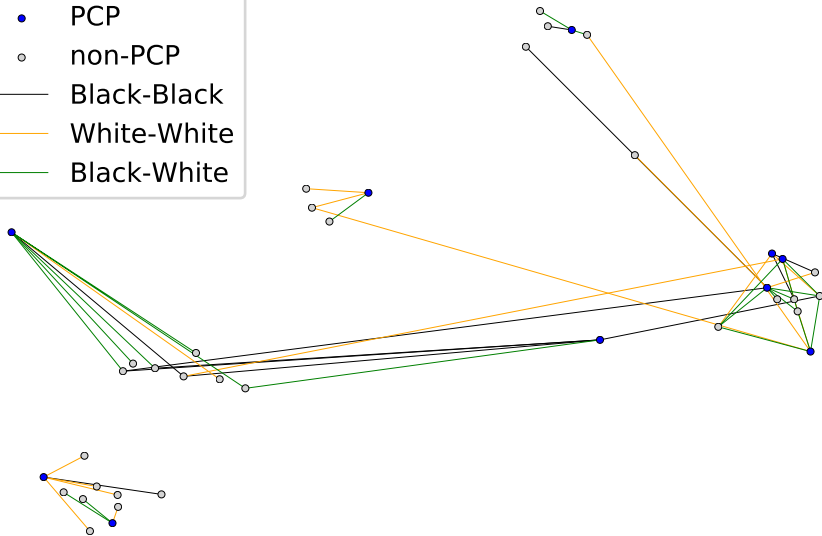

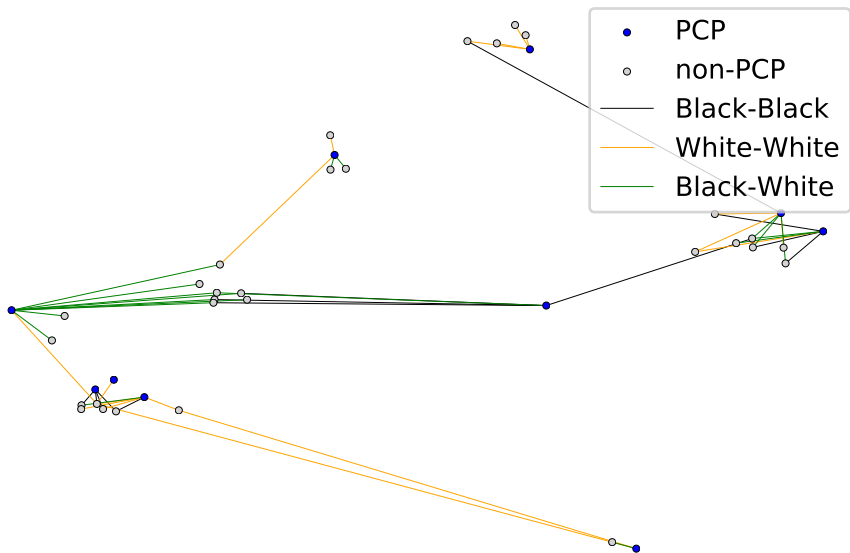

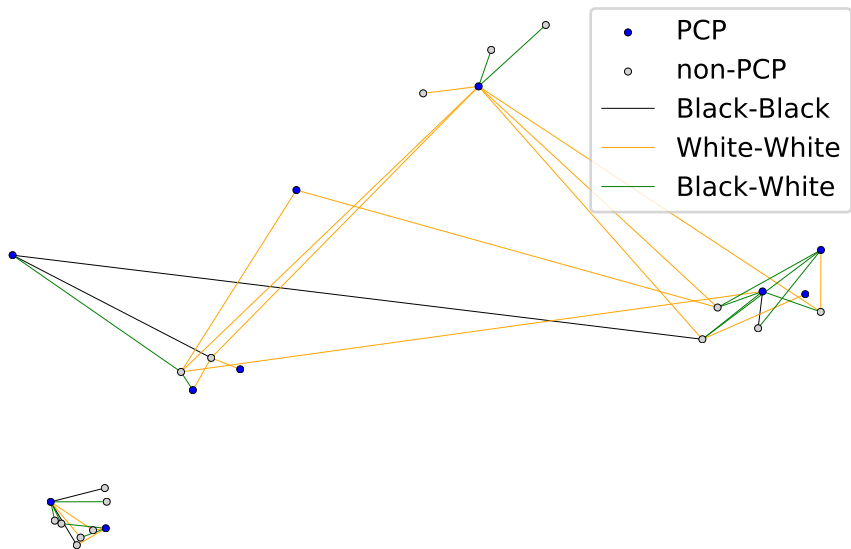



215

HRR: 12; Specialty: 4; Sample: 3

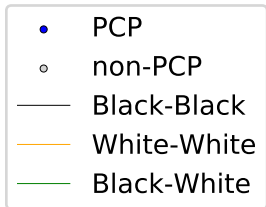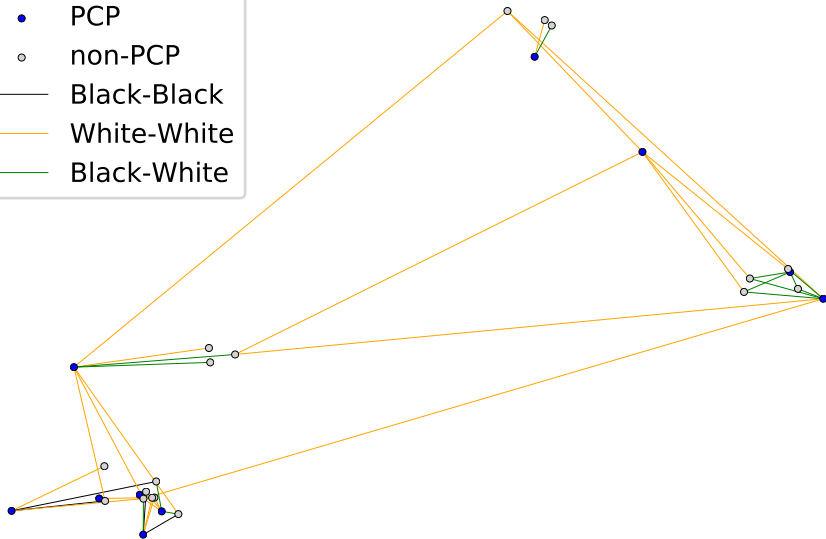

216

HRR: 12; Specialty: 5; Sample: 1

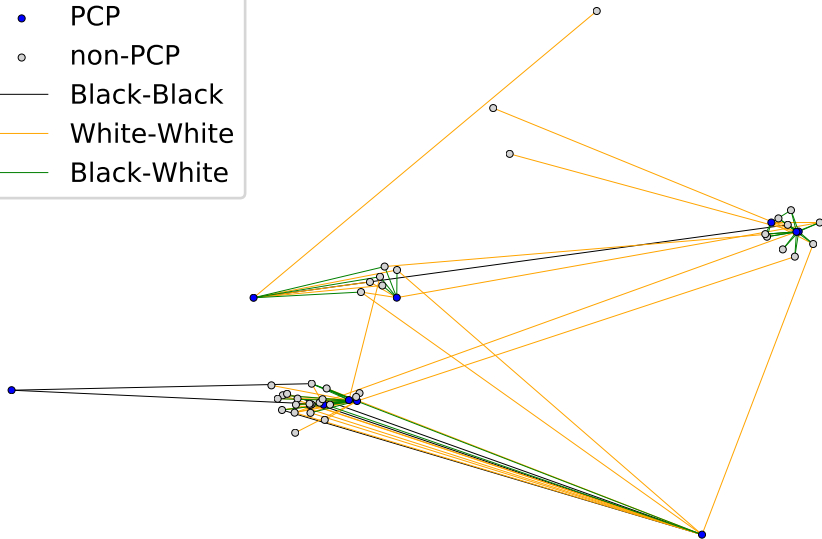



217

HRR: 12; Specialty: 5; Sample: 2

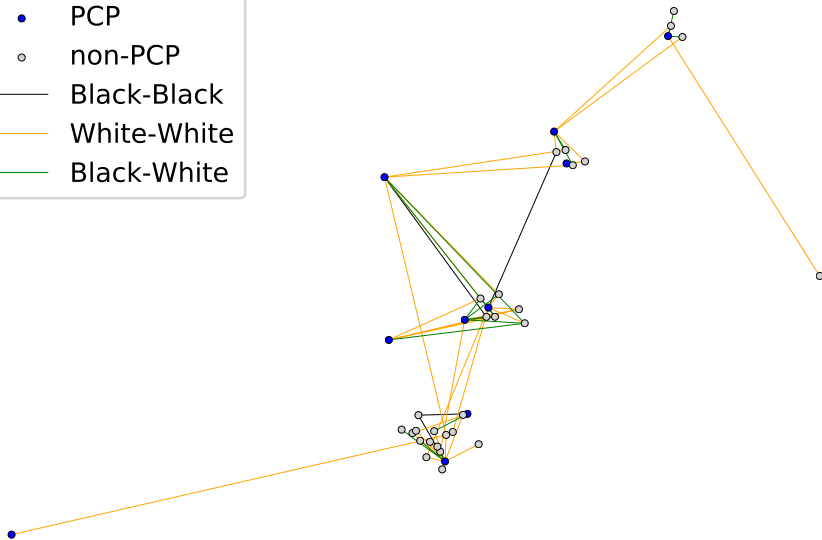

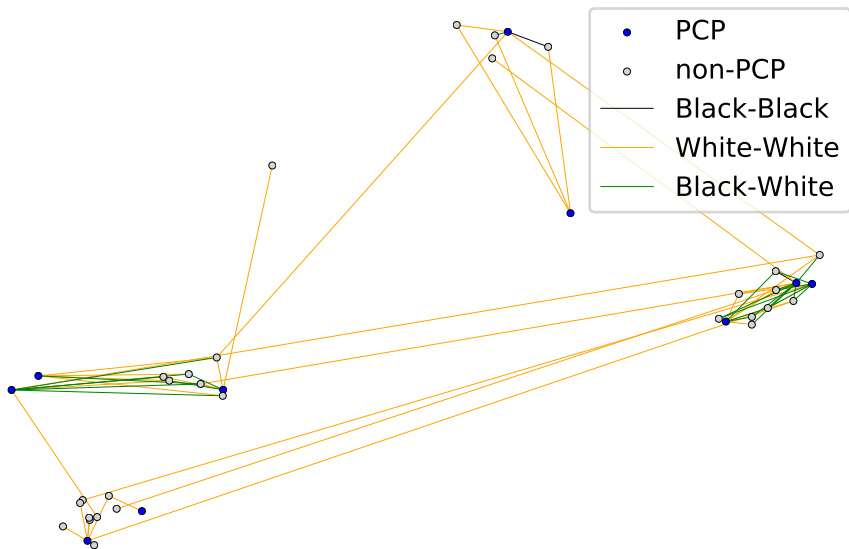

219

HRR: 12; Specialty: 6; Sample: 1

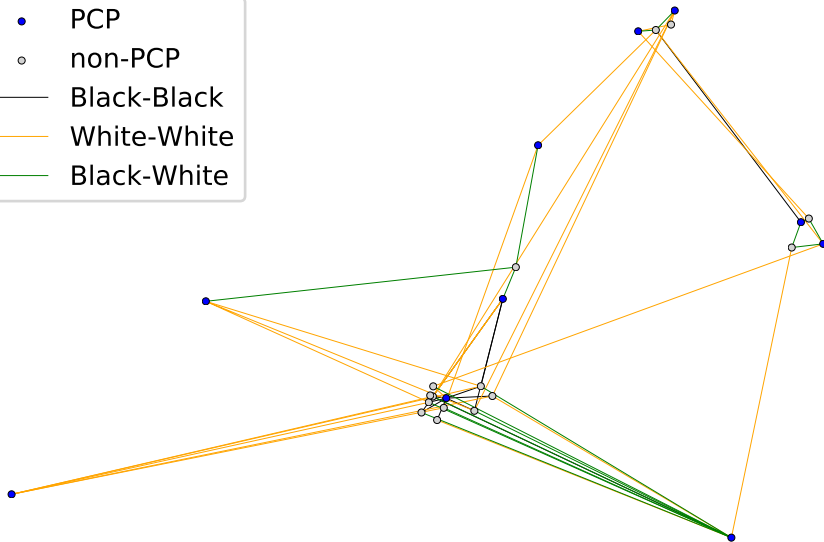

220

HRR: 12; Specialty: 6; Sample: 2

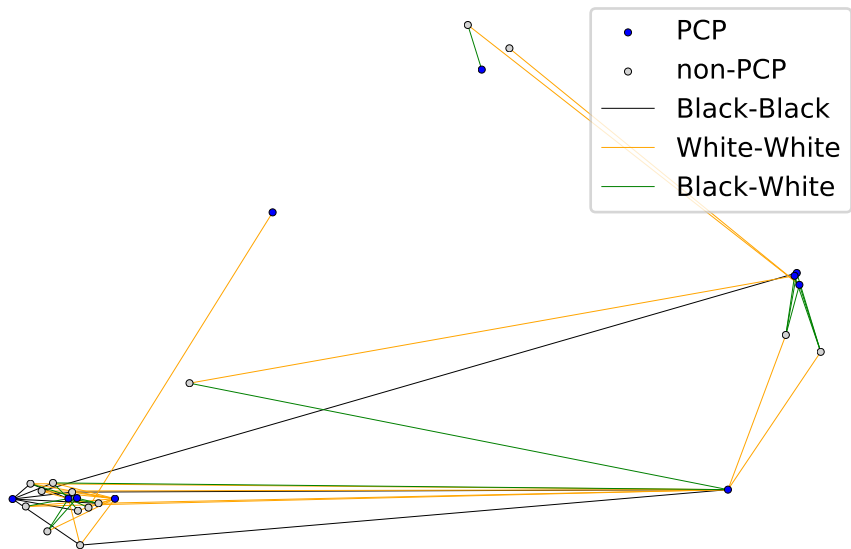

221

HRR: 12; Specialty: 6; Sample: 3

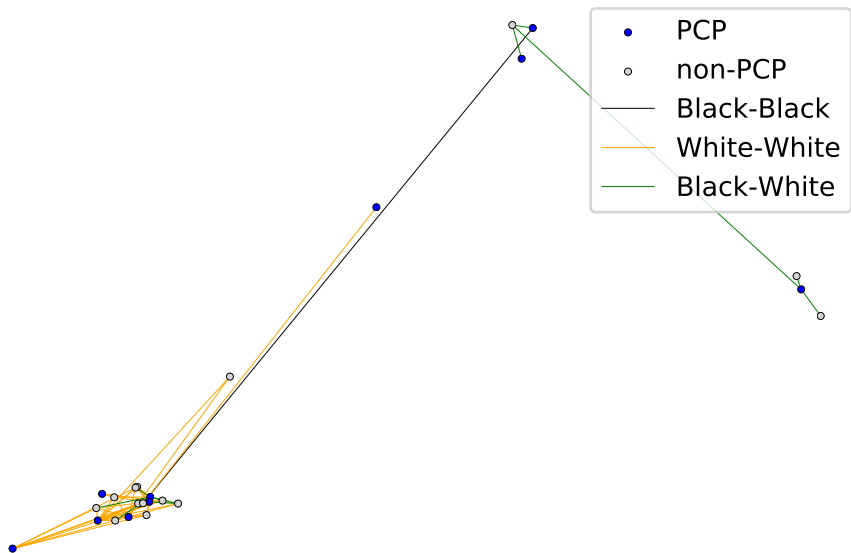

Supplement: jamanetwopen-e2029238-s001.pdf [file jamanetwopen-e2029238-s001.pdf]
